# Supplementary material for: Mechanistic studies: enantioselective palladium(ii)-catalyzed intramolecular aminoarylation of alkenes by dual N–H and aryl C–H bond cleavage
Source: Royal Society of Chemistry journal article supplement (doi:10.1039/c8qo00925b), 2018-01-01
Supplement: c8qo00925b1.pdf [file c8qo00925b1.pdf]

## Supporting Information

### Mechanistic Studies: Enantioselective Palladium(II)-Catalyzed Intramolecular Aminoarylation of Alkenes by Dual N-H and Aryl C-H Bond Cleavage

Yu Zhou, Zhenfeng Shang, Ruifang Li and Xiufang Xu\*

Department of Chemistry, Key Laboratory of Advanced Energy Materials Chemistry (Ministry of Education), College of Chemistry, Nankai University, Tianjin, 300071, P. R. China

#### Contents:

**Fig. S1** The Gibbs free energy changes for the formation of the possible catalysts **3**, **cat1**, **cat2** and **cat3** from the Pd(OAc)<sub>2</sub>.

**Fig. S2** The energy profile for N-H and O-H deprotonation in which PGA replacing acetate acts as the proton acceptor.

**Fig. S3** The energy profile for the intramolecular hydrogen transfer of **1a**.

**Fig. S4** The energy profiles for the formation of **A1-1**, **B1-1**, **A2-1** and **B2-1** from **A1**, **B1**, **A2** and **B2**, respectively.

**Fig. S5** The optimized structures of **A1** and **B1**.

**Table S1:** The M06/SDD-6-311+G(d,p)/SMD(THF)//B3LYP/SDD-6-31G(d) computed energies, enthalpies, free energies of all stationary points discussed in the text.

**The Cartesian Coordinates of the stationary points discussed in the text.**

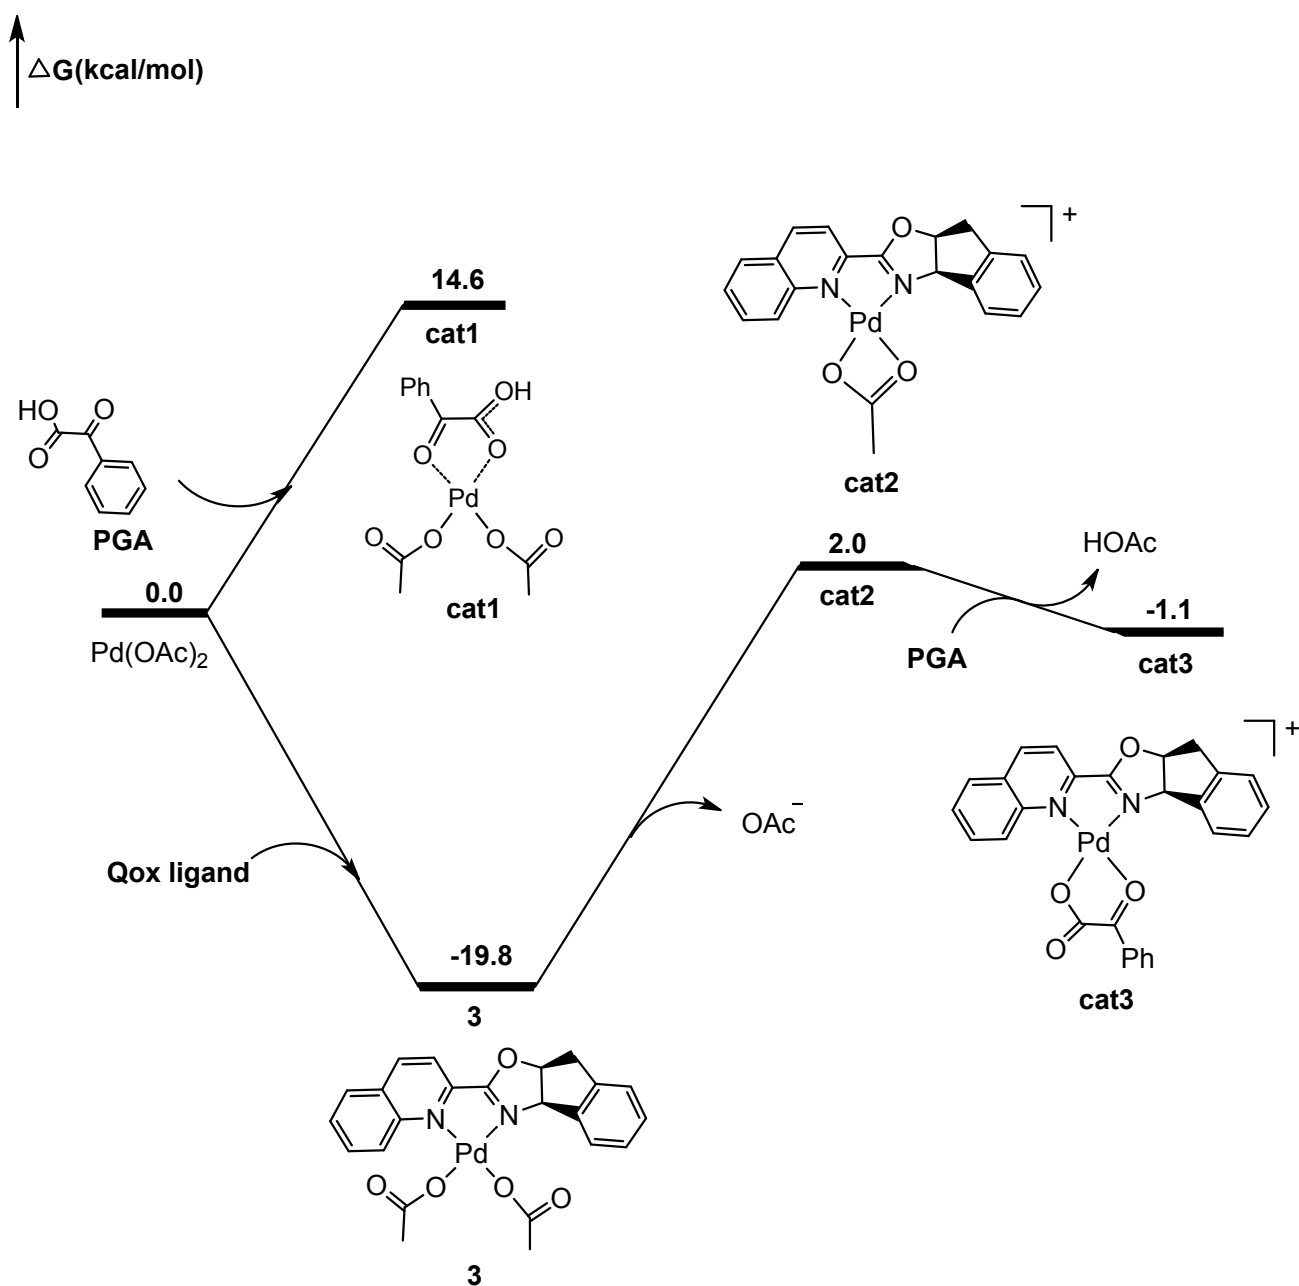

**Fig. S1** The Gibbs free energy changes for the formation of the possible catalysts **3**, **cat1**, **cat2** and **cat3** from the Pd(OAc)<sub>2</sub>.

In the experiment reported by Liu group<sup>1</sup>, the authors proposed the active catalyst was the cationic complex **cat3**, which may facilitate the reaction. In fact, as shown in Fig. S1, our calculation result suggests that the cationic complex **cat3** is difficult to be generated because the formation of **cat3** is endergonic by 18.7 kcal/mol relative to **3**. Thus, the active catalyst should be the thermodynamically most stable species **3**.

1. W. Zhang, P. H. Chen and G. S. Liu, *Angew. Chem., Int. Ed.* 2017, **56**, 5336.

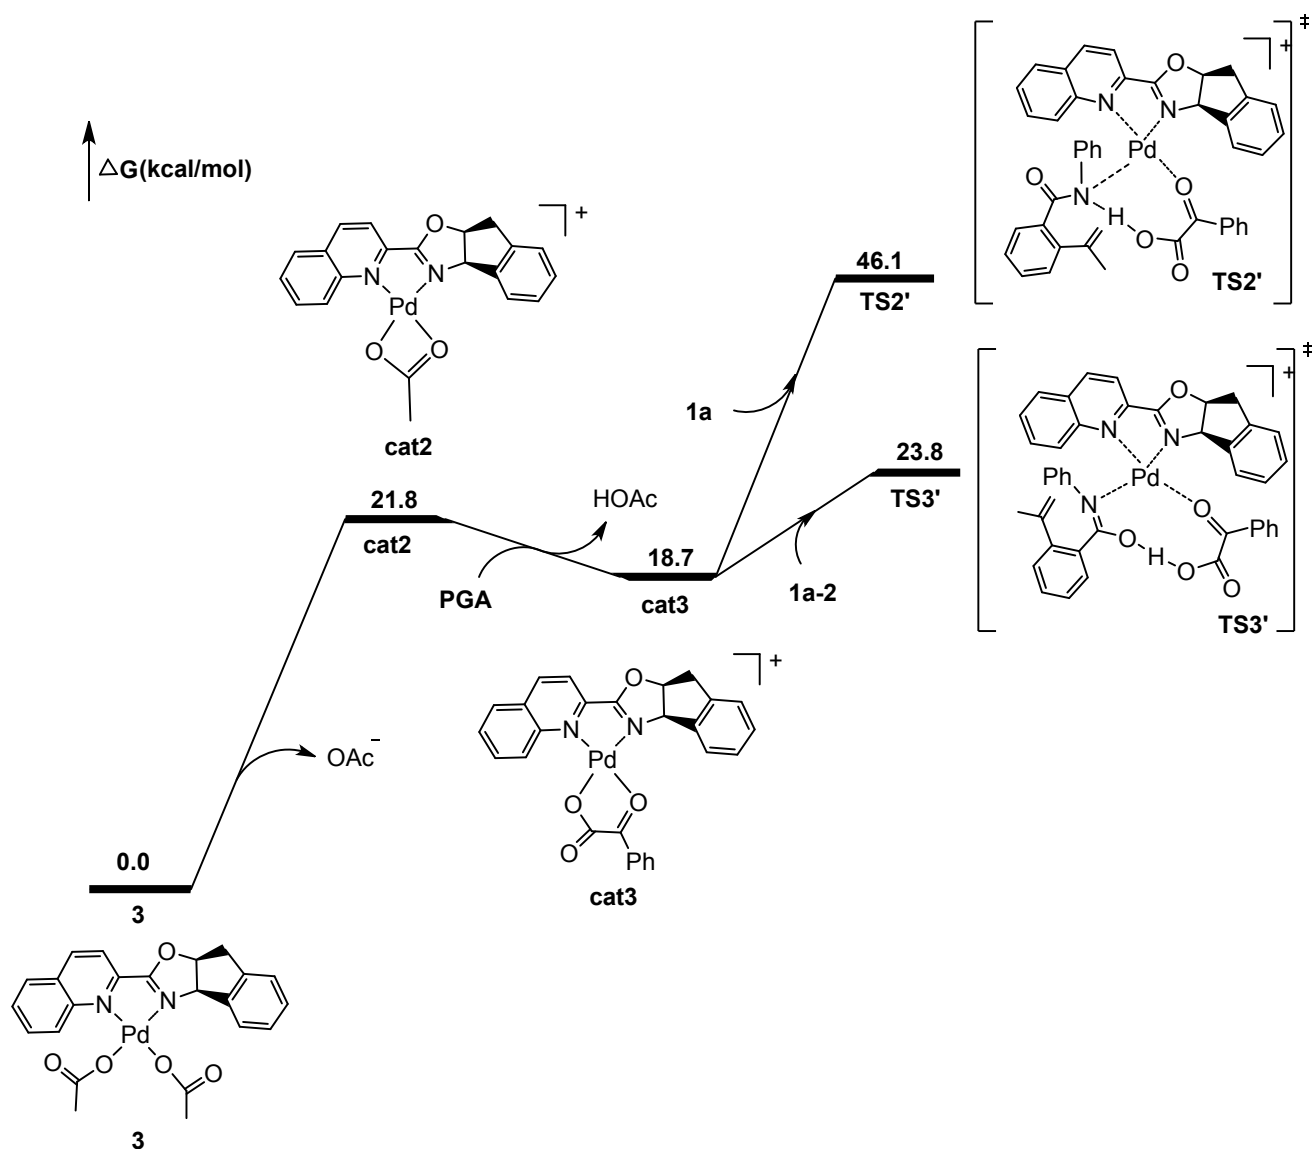

**Fig. S2** The energy profile for N-H and O-H deprotonation in which PGA replacing acetate acts as the proton acceptor.

As shown in Fig. 2, the PGA assisted N-H deprotonation via the transition state **TS2'** requires a very high activation energy of 46.1 kcal/mol, suggesting that the PGA assisted N-H deprotonation would not take place. In addition, O-H deprotonation of the tautomer **1a-2** catalyzed by  $[(L^*)Pd(PGA)]^+$  has been considered, and the calculated activation energy (**TS3'**,  $\Delta G = 23.8$  kcal/mol) is much higher than that of **TS1a** and **TS1b**.

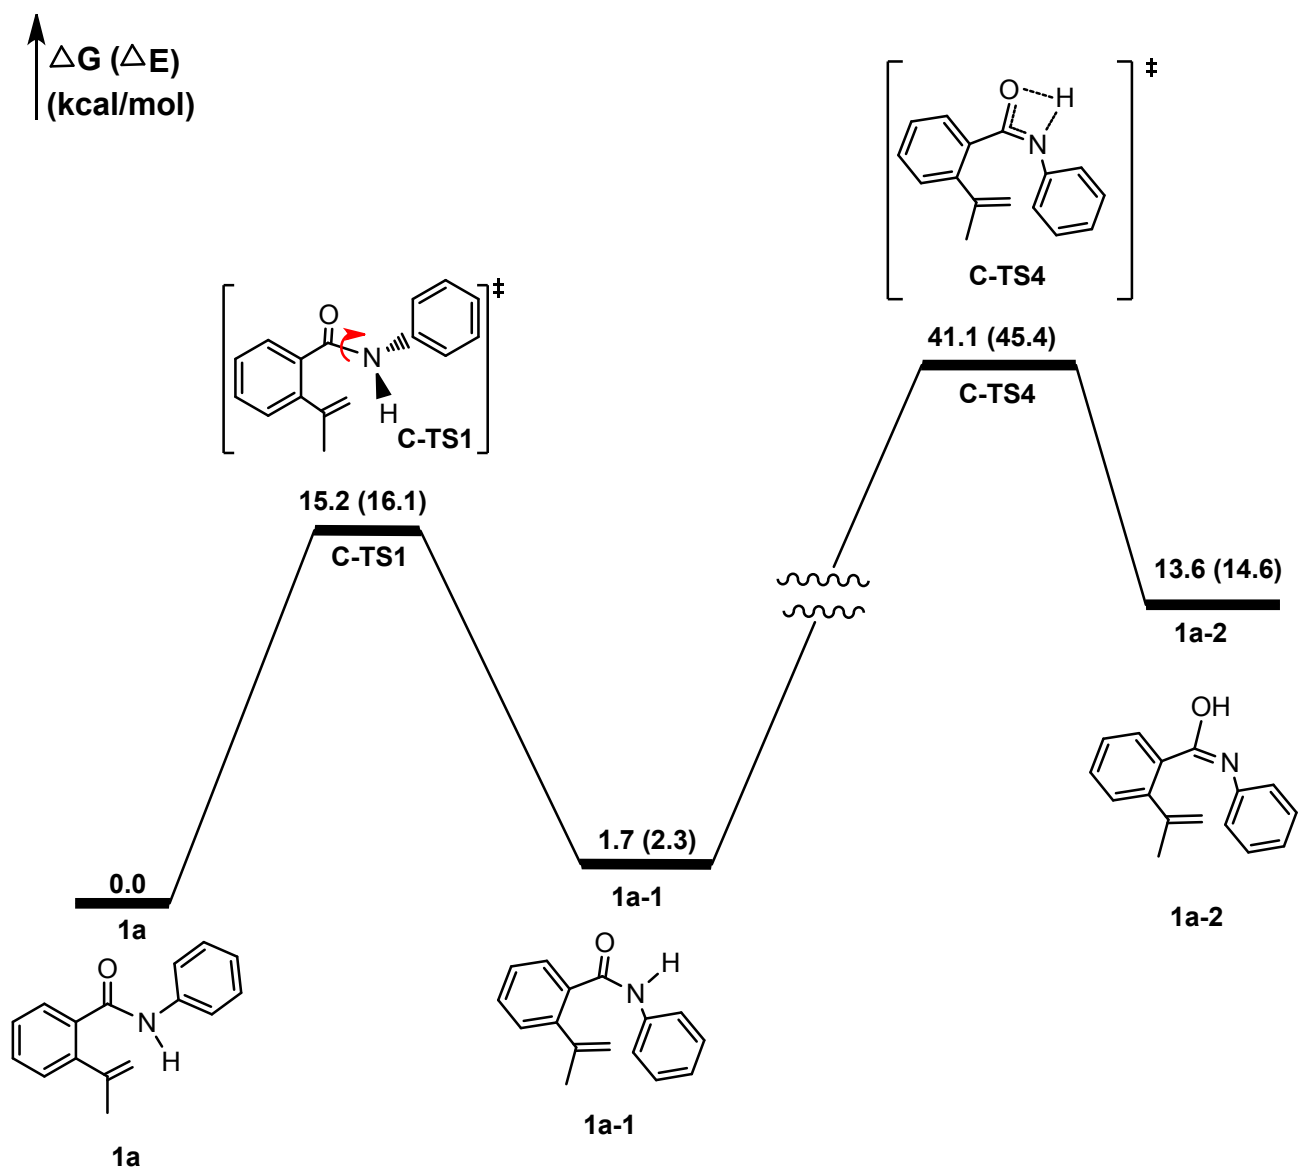

**Fig. S3** The energy profile for the intramolecular hydrogen transfer of **1a**. Free energies (Electronic energies in parentheses) are relative to substrate **1a**.

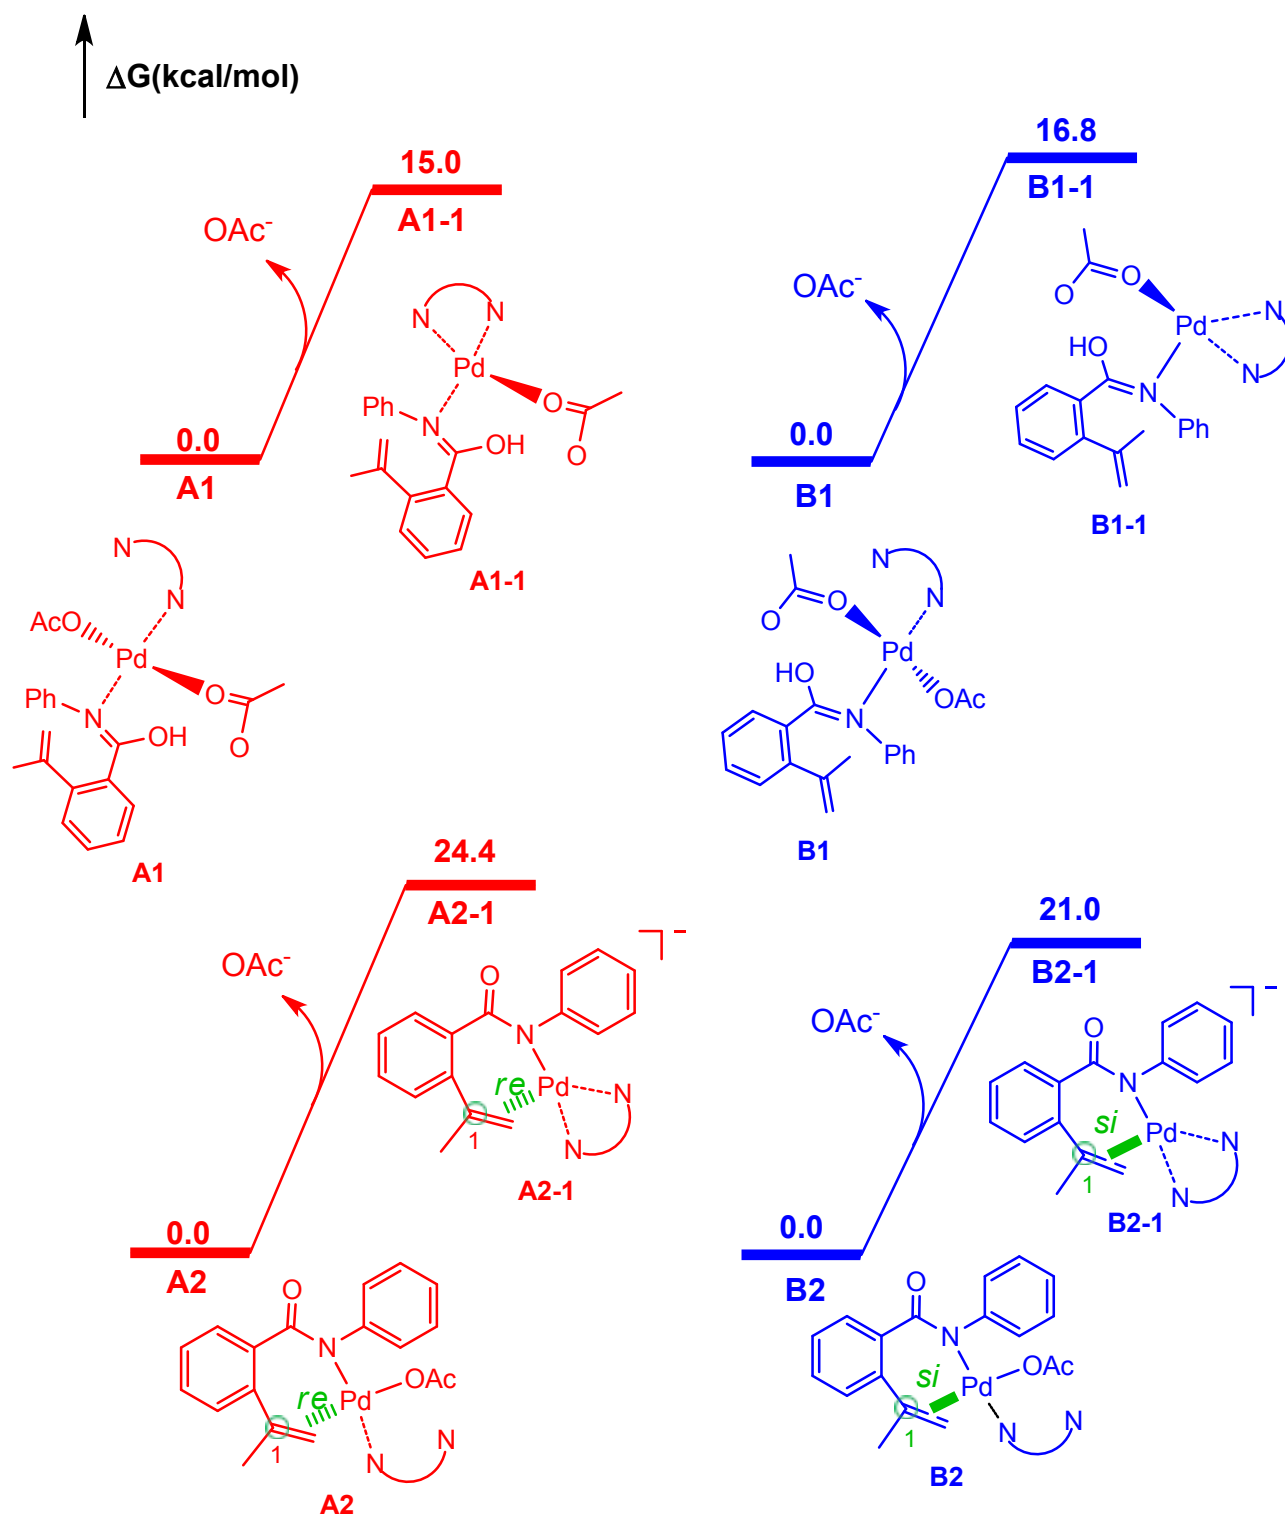

**Fig. S4** The energy profiles for the formation of **A1-1**, **B1-1**, **A2-1** and **B2-1** from **A1**, **B1**, **A2** and **B2**, respectively.

In **A1**, **B1**, **A2** and **B2** the Qox ligand acts as monodentate ligand. If the  $\text{OAc}^-$  ligand dissociates from the palladium center and simultaneously the Qox ligand becomes bidentate ligand, the **A1-1**, **B1-1**, **A2-1** and **B2-1** will be formed from the above four species, respectively. However, as shown in Fig. S4, the calculated Gibbs free energy changes for the above processes are 15.0, 16.8, 24.4 and 21.0 kcal/mol, respectively, which suggests that these processes are endothermic and difficult to take place. It may be because that the palladium center is positively charged, and the interaction between

the palladium center and the anion ligand  $\text{OAc}^-$  is stronger than that between the palladium center and the neutral ligand.

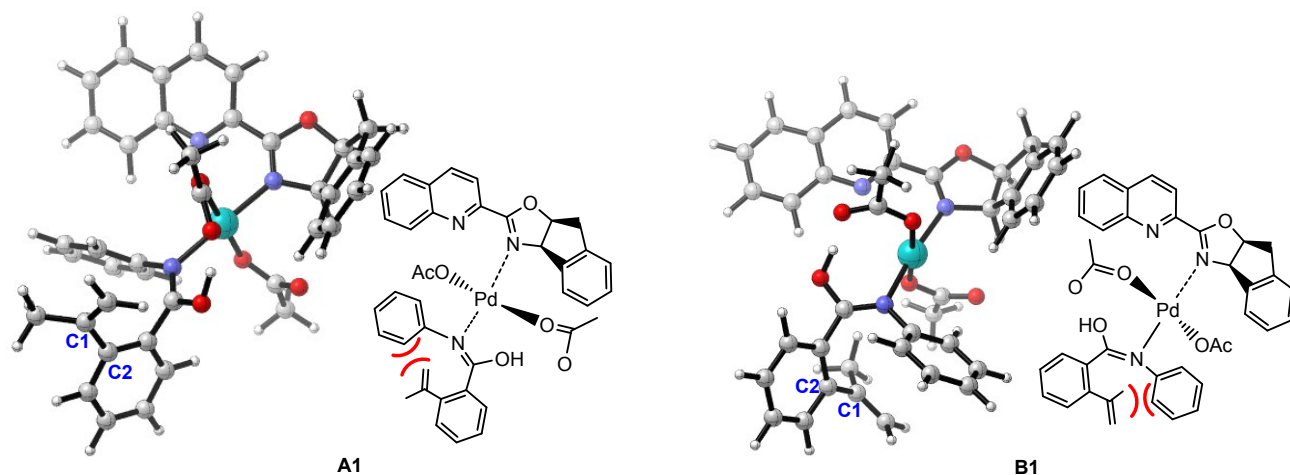

**Fig. S5** The optimized structures of **A1** and **B1**.

**A1** and **B1** are different in energy because they have different conformations. However, interconversion between the two structures is hardly to take place. This is because that the isopropenyl group on the substrate moiety adopts opposite orientation in **A1** relative to that in **B1** (Fig. S5), and steric repulsion between the isopropenyl group and the imidic acid moiety hinder the C1-C2 bond from rotating, and thus interconversion between **A1** and **B1** becomes difficult.

**Table S1: The M06/SDD-6-311+G(d,p)/SMD(THF)//B3LYP/SDD-6-31G(d) computed energies, enthalpies, free energies of all stationary points discussed in the text.**

| species      | E0           | ZPE      | E            | H            | G            |
|--------------|--------------|----------|--------------|--------------|--------------|
| <b>3</b>     | -1501.596389 | 0.392652 | -1501.175970 | -1501.175025 | -1501.264872 |
| <b>1a</b>    | -748.365582  | 0.270554 | -748.079362  | -748.078418  | -748.139138  |
| <b>1a-1</b>  | -748.361913  | 0.269824 | -748.076213  | -748.075268  | -748.136439  |
| <b>cat1</b>  | -1118.735179 | 0.229911 | -1118.483596 | -1118.482652 | -1118.560983 |
| <b>cat2</b>  | -1272.988716 | 0.341998 | -1272.624691 | -1272.623746 | -1272.70012  |
| <b>cat3</b>  | -1577.920731 | 0.405431 | -1577.488609 | -1577.487665 | -1577.575215 |
| <b>C1</b>    | -1496.737956 | 0.541596 | -1496.162866 | -1496.161922 | -1496.266972 |
| <b>C2</b>    | -1282.345555 | 0.396750 | -1281.922260 | -1281.921316 | -1282.010758 |
| <b>1a-2</b>  | -748.342265  | 0.269254 | -748.057158  | -748.056213  | -748.117473  |
| <b>C3</b>    | -1496.709948 | 0.539158 | -1496.137601 | -1496.136657 | -1496.240643 |
| <b>C4</b>    | -1282.330198 | 0.395189 | -1281.908578 | -1281.907633 | -1281.996856 |
| <b>A1</b>    | -2249.970280 | 0.662178 | -2249.262792 | -2249.261848 | -2249.393314 |
| <b>A2</b>    | -2020.919641 | 0.599418 | -2020.280888 | -2020.279944 | -2020.396409 |
| <b>A2-1</b>  | -1792.309005 | 0.548613 | -1791.726665 | -1791.725721 | -1791.827494 |
| <b>A3</b>    | -2020.931350 | 0.600008 | -2020.292645 | -2020.291701 | -2020.406887 |
| <b>A4</b>    | -2020.927720 | 0.600293 | -2020.288574 | -2020.287630 | -2020.403863 |
| <b>A5</b>    | -1791.890496 | 0.537732 | -1791.320415 | -1791.319471 | -1791.418048 |
| <b>A6</b>    | -1791.911966 | 0.537833 | -1791.341295 | -1791.340350 | -1791.442915 |
| <b>B1</b>    | -2249.967986 | 0.662268 | -2249.260460 | -2249.259515 | -2249.391348 |
| <b>B2</b>    | -2020.915027 | 0.599703 | -2020.276121 | -2020.275177 | -2020.390102 |
| <b>B2-1</b>  | -1792.306694 | 0.548613 | -1791.724944 | -1791.724000 | -1791.826512 |
| <b>B3</b>    | -2020.928440 | 0.600228 | -2020.289596 | -2020.288652 | -2020.403758 |
| <b>B4</b>    | -2020.930306 | 0.600294 | -2020.291174 | -2020.290230 | -2020.406515 |
| <b>B5</b>    | -1791.889317 | 0.537666 | -1791.319229 | -1791.318285 | -1791.417311 |
| <b>B6</b>    | -1791.911177 | 0.537820 | -1791.340488 | -1791.339544 | -1791.442651 |
| <b>C-TS1</b> | -748.339859  | 0.268383 | -748.056177  | -748.055232  | -748.114844  |
| <b>C-TS2</b> | -1496.706731 | 0.532883 | -1496.141196 | -1496.140252 | -1496.242065 |
| <b>C-TS3</b> | -1282.329290 | 0.391175 | -1281.912173 | -1281.911229 | -1281.998685 |
| <b>C-TS4</b> | -748.293200  | 0.264485 | -748.012989  | -748.012045  | -748.073564  |
| <b>HOAc</b>  | -229.039435  | 0.062040 | -228.972832  | -228.971888  | -229.004618  |
| <b>PGA</b>   | -533.964289  | 0.125286 | -533.829874  | -533.828930  | -533.874752  |
| <b>Qox</b>   | -916.762815  | 0.286109 | -916.461190  | -916.460245  | -916.521586  |
| <b>R-2a</b>  | -747.194569  | 0.250554 | -746.930738  | -746.929794  | -746.983506  |
| <b>S-2a</b>  | -747.194568  | 0.250554 | -746.930737  | -746.929793  | -746.983504  |
| <b>TS1'</b>  | -2249.933247 | 0.658346 | -2249.230132 | -2249.229188 | -2249.358792 |
| <b>TS2'</b>  | -2326.258620 | 0.670141 | -2325.544177 | -2325.543233 | -2325.670725 |
| <b>TS3'</b>  | -2326.297548 | 0.671555 | -2325.582338 | -2325.581394 | -2325.706271 |
| <b>TS1a</b>  | -2249.967784 | 0.658540 | -2249.264337 | -2249.263393 | -2249.394091 |
| <b>TS1b</b>  | -2249.965696 | 0.658438 | -2249.262393 | -2249.261448 | -2249.391534 |
| <b>TS2a</b>  | -2020.908627 | 0.598113 | -2020.271842 | -2020.270898 | -2020.385041 |
| <b>TS2b</b>  | -2020.905534 | 0.598295 | -2020.268627 | -2020.267683 | -2020.381496 |

|             |              |          |              |              |              |
|-------------|--------------|----------|--------------|--------------|--------------|
| <b>TS3a</b> | -2020.906642 | 0.595911 | -2020.272911 | -2020.271967 | -2020.383682 |
| <b>TS3b</b> | -2020.906888 | 0.595740 | -2020.273204 | -2020.272260 | -2020.385240 |
| <b>TS4a</b> | -1791.855194 | 0.535319 | -1791.287415 | -1791.286471 | -1791.387056 |
| <b>TS4b</b> | -1791.854670 | 0.535265 | -1791.286935 | -1791.285991 | -1791.386976 |

E0 is the electronic energy. ZPE is the Zero-point vibrational energy. U, H and G are the thermal energy, enthalpy and Gibbs free energy obtained by adding the thermal corrections from frequency calculations to E0. All energies are in Hartree.

### The Cartesian Coordinates of the stationary points discussed in the text.

#### 1a

| Atom | X         | Y         | Z         | 1a-1 | Atom      | X         | Y         | Z |
|------|-----------|-----------|-----------|------|-----------|-----------|-----------|---|
| C    | 3.590701  | 0.684195  | -0.248129 | C    | -2.207473 | -0.914780 | 1.435015  |   |
| C    | 2.216962  | 0.559929  | 0.014697  | C    | -1.437831 | 0.054163  | 0.772139  |   |
| C    | 1.644598  | -0.734811 | 0.006897  | C    | -1.431935 | 0.042038  | -0.639571 |   |
| C    | 2.465764  | -1.847676 | -0.226499 | C    | -2.219852 | -0.879828 | -1.340042 |   |
| C    | 3.825495  | -1.704075 | -0.483748 | C    | -2.971583 | -1.837197 | -0.661908 |   |
| C    | 4.389712  | -0.428794 | -0.503376 | C    | -2.955147 | -1.859525 | 0.732905  |   |
| H    | 4.032667  | 1.676276  | -0.229261 | H    | -2.228527 | -0.903277 | 2.520934  |   |
| H    | 2.003639  | -2.828780 | -0.205187 | H    | -2.226990 | -0.842314 | -2.425580 |   |
| H    | 4.438925  | -2.581213 | -0.669690 | H    | -3.569340 | -2.553756 | -1.218249 |   |
| H    | 5.449676  | -0.298042 | -0.704271 | H    | -3.538753 | -2.598023 | 1.276140  |   |
| C    | 0.182267  | -1.067464 | 0.206301  | C    | -0.651199 | 1.026570  | -1.467041 |   |
| O    | -0.154589 | -2.150650 | 0.675305  | O    | -1.215401 | 1.791336  | -2.242351 |   |
| N    | -0.709323 | -0.115744 | -0.229840 | N    | 0.723364  | 1.077191  | -1.338583 |   |
| H    | -0.306660 | 0.731686  | -0.612419 | H    | 1.109454  | 1.857223  | -1.859893 |   |
| C    | -2.119558 | -0.139296 | -0.193602 | C    | 1.665628  | 0.205697  | -0.741522 |   |
| C    | -2.786151 | 0.993472  | -0.690803 | C    | 2.874168  | 0.760020  | -0.294559 |   |
| C    | -2.868909 | -1.217630 | 0.303256  | C    | 1.466881  | -1.177827 | -0.637549 |   |
| C    | -4.176470 | 1.051255  | -0.691709 | C    | 3.861964  | -0.051842 | 0.257340  |   |
| H    | -2.207410 | 1.829928  | -1.077624 | H    | 3.029421  | 1.833257  | -0.374450 |   |
| C    | -4.262094 | -1.142463 | 0.294768  | C    | 2.453381  | -1.978793 | -0.062374 |   |
| H    | -2.356804 | -2.089766 | 0.683311  | H    | 0.554511  | -1.626612 | -1.011022 |   |
| C    | -4.925905 | -0.018397 | -0.197676 | C    | 3.653955  | -1.426397 | 0.386067  |   |
| H    | -4.673297 | 1.936086  | -1.080795 | H    | 4.792839  | 0.395083  | 0.595939  |   |
| H    | -4.833107 | -1.982727 | 0.681300  | H    | 2.284367  | -3.049542 | 0.015350  |   |
| H    | -6.011324 | 0.024420  | -0.198286 | H    | 4.420916  | -2.059633 | 0.822583  |   |
| C    | 1.464596  | 1.812168  | 0.355005  | C    | -0.718736 | 1.086446  | 1.581779  |   |
| C    | 1.323123  | 2.791864  | -0.550356 | C    | 0.188363  | 0.725388  | 2.497604  |   |
| H    | 1.706537  | 2.693876  | -1.562592 | H    | 0.478288  | -0.311811 | 2.638260  |   |
| H    | 0.829356  | 3.727726  | -0.299774 | H    | 0.686444  | 1.463053  | 3.121898  |   |
| C    | 0.967197  | 1.948092  | 1.776733  | C    | -1.132727 | 2.528336  | 1.383061  |   |
| H    | 0.298930  | 1.125169  | 2.052737  | H    | -1.060570 | 2.842115  | 0.336197  |   |
| H    | 1.812009  | 1.917703  | 2.476605  | H    | -2.182449 | 2.667882  | 1.673857  |   |
| H    | 0.430866  | 2.890848  | 1.921827  |      |           |           |           |   |



|          |           |           |           |             |           |           |           |
|----------|-----------|-----------|-----------|-------------|-----------|-----------|-----------|
| H        | -0.517105 | 3.200518  | 1.988856  | O           | -1.441489 | 1.733054  | -2.665104 |
|          |           |           |           | C           | -2.323311 | 3.804563  | -1.812370 |
| <b>3</b> |           |           |           | H           | -1.678193 | 4.571870  | -2.257489 |
| Atom     | X         | Y         | Z         | H           | -3.179772 | 3.660640  | -2.477252 |
| C        | -0.478112 | -1.826421 | -0.654730 | H           | -2.653191 | 4.159784  | -0.833252 |
| O        | -1.309989 | -2.847594 | -0.890372 | C           | 2.399950  | 4.136066  | 1.372969  |
| N        | -0.958748 | -0.635677 | -0.701365 | H           | 3.399015  | 4.071604  | 0.928956  |
| C        | 1.484686  | -3.339755 | -0.278798 | H           | 1.862403  | 4.933327  | 0.846738  |
| C        | 2.825019  | -3.468770 | -0.004664 | H           | 2.475185  | 4.390842  | 2.432269  |
| C        | 3.620258  | -2.311649 | 0.157328  |             |           |           |           |
| C        | 2.993399  | -1.021453 | 0.041987  | <b>cat1</b> |           |           |           |
| C        | 0.939317  | -2.043923 | -0.364594 | Atom        | X         | Y         | Z         |
| H        | 5.476875  | -3.362049 | 0.506457  | Pd          | -1.269824 | 0.059914  | 0.021532  |
| H        | 0.836244  | -4.195210 | -0.427230 | C           | -3.521474 | -1.504476 | -0.362147 |
| H        | 3.284488  | -4.449954 | 0.079710  | O           | -2.769312 | -2.156215 | -1.082765 |
| C        | 5.013881  | -2.383096 | 0.414892  | O           | -3.174971 | -0.419374 | 0.299419  |
| C        | 3.788668  | 0.146561  | 0.161934  | C           | -1.309808 | 2.840004  | 0.235075  |
| C        | 5.139828  | 0.032733  | 0.403167  | O           | -1.899793 | 1.883178  | -0.450907 |
| C        | 5.759726  | -1.234022 | 0.537518  | O           | -0.452012 | 2.672244  | 1.098022  |
| H        | 3.303174  | 1.110997  | 0.054036  | C           | -1.826199 | 4.219393  | -0.154370 |
| H        | 5.741761  | 0.932555  | 0.491173  | H           | -2.880038 | 4.309233  | 0.130215  |
| H        | 6.826580  | -1.294418 | 0.732066  | H           | -1.242739 | 4.987389  | 0.357229  |
| N        | 1.645701  | -0.914797 | -0.197527 | H           | -1.766821 | 4.359732  | -1.238192 |
| C        | -2.603029 | -2.243223 | -1.273996 | C           | -4.983190 | -1.869907 | -0.148525 |
| H        | -2.724052 | -2.456289 | -2.337996 | H           | -5.207549 | -1.941583 | 0.920487  |
| C        | -2.412759 | -0.733347 | -0.930823 | H           | -5.622682 | -1.084199 | -0.564921 |
| H        | -2.672887 | -0.047655 | -1.739788 | H           | -5.200557 | -2.819127 | -0.642142 |
| C        | -3.741531 | -2.781845 | -0.395449 | C           | 0.921547  | -1.779070 | 0.473804  |
| H        | -4.640605 | -2.931517 | -1.008142 | O           | -0.302208 | -1.814389 | 0.558215  |
| H        | -3.480210 | -3.758288 | 0.027765  | C           | 1.599773  | -0.488876 | 0.011040  |
| C        | -3.949609 | -1.700323 | 0.645249  | O           | 0.788813  | 0.419615  | -0.240218 |
| C        | -3.223338 | -0.543511 | 0.338467  | C           | 3.040753  | -0.263477 | -0.091767 |
| C        | -4.753584 | -1.740425 | 1.784440  | C           | 3.996695  | -1.298465 | -0.149466 |
| C        | -3.275581 | 0.584194  | 1.159451  | C           | 3.464750  | 1.082993  | -0.162264 |
| C        | -4.812872 | -0.614706 | 2.609826  | C           | 5.346455  | -0.985183 | -0.279191 |
| H        | -5.322954 | -2.633153 | 2.032062  | H           | 3.688930  | -2.334855 | -0.108535 |
| C        | -4.078666 | 0.536546  | 2.301506  | C           | 4.815271  | 1.381988  | -0.278350 |
| H        | -2.685773 | 1.465535  | 0.923661  | H           | 2.719915  | 1.869748  | -0.104789 |
| H        | -5.431740 | -0.636018 | 3.502983  | C           | 5.757849  | 0.348995  | -0.339648 |
| H        | -4.127056 | 1.399548  | 2.959444  | H           | 6.079614  | -1.784175 | -0.333565 |
| Pd       | 0.385391  | 0.855453  | -0.359056 | H           | 5.137106  | 2.418077  | -0.318844 |
| C        | 1.639205  | 2.825936  | 1.204751  | H           | 6.814210  | 0.585036  | -0.433100 |
| O        | 1.023322  | 2.304271  | 2.129047  | O           | 1.683191  | -2.819389 | 0.788695  |
| O        | 1.724098  | 2.340571  | -0.018103 | H           | 1.088325  | -3.550181 | 1.056880  |
| C        | -1.524606 | 2.507336  | -1.710917 |             |           |           |           |
| O        | -0.959394 | 2.350392  | -0.539248 | <b>cat2</b> |           |           |           |

| Atom | X         | Y         | Z         | cat3 | Atom | X         | Y         | Z         |
|------|-----------|-----------|-----------|------|------|-----------|-----------|-----------|
| C    | -0.457211 | -1.602084 | -0.740914 |      | C    | -1.889354 | 1.561471  | -0.865522 |
| O    | -1.272485 | -2.607699 | -1.003424 |      | O    | -2.243884 | 2.776932  | -1.252260 |
| N    | -0.925708 | -0.402109 | -0.845158 |      | N    | -0.627713 | 1.302942  | -0.771052 |
| C    | 1.525738  | -3.067257 | -0.216302 |      | C    | -4.253595 | 0.768688  | -0.626669 |
| C    | 2.847318  | -3.134059 | 0.172487  |      | C    | -5.113347 | -0.254152 | -0.290381 |
| C    | 3.568656  | -1.949250 | 0.434287  |      | C    | -4.596638 | -1.497961 | 0.126923  |
| C    | 2.898965  | -0.680849 | 0.286647  |      | C    | -3.164694 | -1.677400 | 0.188436  |
| C    | 0.935945  | -1.801035 | -0.338750 |      | C    | -2.874297 | 0.530343  | -0.542523 |
| H    | 5.428625  | -2.925455 | 0.945984  |      | H    | -6.521997 | -2.428166 | 0.437478  |
| H    | 0.936707  | -3.952312 | -0.426653 |      | H    | -4.605337 | 1.741527  | -0.949312 |
| H    | 3.342694  | -4.094720 | 0.280027  |      | H    | -6.189061 | -0.112188 | -0.341236 |
| C    | 4.930033  | -1.966803 | 0.836868  |      | C    | -5.447141 | -2.575562 | 0.488366  |
| C    | 3.612848  | 0.516612  | 0.546398  |      | C    | -2.646998 | -2.927520 | 0.611868  |
| C    | 4.932532  | 0.452155  | 0.935071  |      | C    | -3.510247 | -3.944954 | 0.954325  |
| C    | 5.598751  | -0.790973 | 1.082382  |      | C    | -4.916214 | -3.776331 | 0.894545  |
| H    | 3.116796  | 1.472138  | 0.437654  |      | H    | -1.576247 | -3.075773 | 0.656890  |
| H    | 5.473660  | 1.372383  | 1.132604  |      | H    | -3.101027 | -4.897544 | 1.276787  |
| H    | 6.639468  | -0.808959 | 1.389944  |      | H    | -5.569789 | -4.597846 | 1.170548  |
| N    | 1.585100  | -0.646708 | -0.101092 |      | N    | -2.330400 | -0.641131 | -0.157466 |
| C    | -2.569449 | -2.012921 | -1.416808 |      | C    | -0.993055 | 3.511636  | -1.555820 |
| H    | -2.692343 | -2.295423 | -2.462698 |      | H    | -1.006585 | 3.671867  | -2.634697 |
| C    | -2.369456 | -0.477323 | -1.174085 |      | C    | 0.130651  | 2.544382  | -1.051820 |
| H    | -2.561185 | 0.138154  | -2.057834 |      | H    | 0.895668  | 2.330272  | -1.803817 |
| C    | -3.704654 | -2.488189 | -0.496822 |      | C    | -0.905719 | 4.801940  | -0.727998 |
| H    | -4.581296 | -2.760520 | -1.097463 |      | H    | -0.529060 | 5.620116  | -1.354574 |
| H    | -3.405807 | -3.388909 | 0.050779  |      | H    | -1.898205 | 5.104618  | -0.376630 |
| C    | -3.989363 | -1.297538 | 0.395431  |      | C    | 0.061746  | 4.465679  | 0.387519  |
| C    | -3.273291 | -0.162583 | -0.001237 |      | C    | 0.669326  | 3.219901  | 0.193418  |
| C    | -4.875075 | -1.223814 | 1.470781  |      | C    | 0.408456  | 5.249297  | 1.488533  |
| C    | -3.432280 | 1.060798  | 0.652132  |      | C    | 1.633531  | 2.741156  | 1.081746  |
| C    | -5.029413 | -0.005975 | 2.137357  |      | C    | 1.364439  | 4.769671  | 2.386782  |
| H    | -5.441268 | -2.096390 | 1.785075  |      | H    | -0.054474 | 6.219538  | 1.647015  |
| C    | -4.316690 | 1.128670  | 1.730598  |      | C    | 1.975194  | 3.526024  | 2.184849  |
| H    | -2.882832 | 1.940982  | 0.329929  |      | H    | 2.108713  | 1.777736  | 0.921043  |
| H    | -5.715681 | 0.062806  | 2.976293  |      | H    | 1.639998  | 5.370235  | 3.248689  |
| H    | -4.456966 | 2.069475  | 2.254470  |      | H    | 2.720833  | 3.170911  | 2.890032  |
| O    | -0.619522 | 2.822568  | -0.648731 |      | C    | 4.644452  | -2.749421 | 0.074102  |
| Pd   | 0.392913  | 1.054160  | -0.396621 |      | C    | 6.029383  | -2.725621 | -0.051621 |
| C    | 0.427139  | 3.496202  | -0.326667 |      | C    | 6.678384  | -1.565516 | -0.482281 |
| O    | 1.464343  | 2.805245  | -0.028257 |      | C    | 5.943266  | -0.411446 | -0.792367 |
| C    | 0.437247  | 4.986925  | -0.331900 |      | C    | 4.563970  | -0.419947 | -0.669977 |
| H    | 1.123362  | 5.361804  | 0.431468  |      | C    | 3.892668  | -1.590529 | -0.234268 |
| H    | 0.789107  | 5.336339  | -1.310373 |      | H    | 4.132550  | -3.642961 | 0.405438  |
| H    | -0.571230 | 5.373825  | -0.169337 |      | H    | 6.604638  | -3.614705 | 0.186282  |

|    |           |           |           |
|----|-----------|-----------|-----------|
| H  | 7.760370  | -1.556146 | -0.579270 |
| H  | 6.454454  | 0.485080  | -1.128998 |
| H  | 3.985551  | 0.464972  | -0.910802 |
| C  | 2.449103  | -1.560101 | -0.120156 |
| O  | 1.820514  | -0.488576 | -0.363135 |
| C  | 1.564464  | -2.770035 | 0.286548  |
| O  | 2.020148  | -3.855735 | 0.580387  |
| O  | 0.283725  | -2.481359 | 0.276306  |
| Pd | -0.212492 | -0.602967 | -0.221978 |

### C1

| Atom | X         | Y         | Z         |
|------|-----------|-----------|-----------|
| C    | 5.319118  | -1.784695 | 1.046936  |
| C    | 4.082330  | -1.129087 | 0.943399  |
| C    | 3.257238  | -1.444297 | -0.157728 |
| C    | 3.652329  | -2.422374 | -1.078667 |
| C    | 4.887492  | -3.056499 | -0.960072 |
| C    | 5.727954  | -2.726603 | 0.103374  |
| H    | 5.954379  | -1.557031 | 1.898061  |
| H    | 2.983357  | -2.671437 | -1.897442 |
| H    | 5.186959  | -3.804803 | -1.688531 |
| H    | 6.693093  | -3.214510 | 0.210814  |
| C    | 1.912216  | -0.808415 | -0.375776 |
| O    | 0.896785  | -1.524623 | -0.351255 |
| N    | 1.803911  | 0.530898  | -0.587617 |
| H    | 0.829575  | 0.867259  | -0.562618 |
| C    | 2.775523  | 1.531737  | -0.831922 |
| C    | 2.447333  | 2.841839  | -0.450393 |
| C    | 3.988875  | 1.289752  | -1.490025 |
| C    | 3.332138  | 3.887578  | -0.700315 |
| H    | 1.493571  | 3.027015  | 0.035687  |
| C    | 4.874208  | 2.343142  | -1.719595 |
| H    | 4.236809  | 0.291967  | -1.830958 |
| C    | 4.556231  | 3.643941  | -1.326832 |
| H    | 3.063205  | 4.896651  | -0.399386 |
| H    | 5.813756  | 2.141959  | -2.227711 |
| H    | 5.248266  | 4.459420  | -1.517246 |
| C    | 3.670478  | -0.180449 | 2.024459  |
| C    | 4.416696  | 0.893529  | 2.309390  |
| H    | 5.300124  | 1.146436  | 1.730537  |
| H    | 4.149413  | 1.569457  | 3.117785  |
| C    | 2.438569  | -0.540982 | 2.825926  |
| H    | 2.595028  | -1.485463 | 3.364192  |
| H    | 2.206208  | 0.237711  | 3.558835  |
| H    | 1.558590  | -0.690636 | 2.191205  |
| C    | -5.319281 | 1.784443  | 1.046708  |

|   |           |           |           |
|---|-----------|-----------|-----------|
| C | -4.082474 | 1.128875  | 0.943168  |
| C | -3.257248 | 1.444354  | -0.157779 |
| C | -3.652228 | 2.422644  | -1.078534 |
| C | -4.887411 | 3.056735  | -0.959939 |
| C | -5.728004 | 2.726579  | 0.103322  |
| H | -5.954655 | 1.556557  | 1.897690  |
| H | -2.983164 | 2.671907  | -1.897174 |
| H | -5.186792 | 3.805210  | -1.688257 |
| H | -6.693160 | 3.214453  | 0.210757  |
| C | -1.912193 | 0.808514  | -0.375774 |
| O | -0.896750 | 1.524695  | -0.350821 |
| N | -1.803862 | -0.530720 | -0.588055 |
| H | -0.829527 | -0.867058 | -0.563024 |
| C | -2.775406 | -1.531517 | -0.832786 |
| C | -2.447155 | -2.841736 | -0.451704 |
| C | -3.988739 | -1.289377 | -1.490869 |
| C | -3.331880 | -3.887441 | -0.702042 |
| H | -1.493405 | -3.027024 | 0.034358  |
| C | -4.873990 | -2.342745 | -1.720861 |
| H | -4.236727 | -0.291491 | -1.831462 |
| C | -4.555954 | -3.643662 | -1.328542 |
| H | -3.062897 | -4.896602 | -0.401454 |
| H | -5.813522 | -2.141439 | -2.228958 |
| H | -5.247927 | -4.459117 | -1.519286 |
| C | -3.670753 | 0.179951  | 2.024032  |
| C | -4.416940 | -0.894169 | 2.308504  |
| H | -5.300245 | -1.146969 | 1.729415  |
| H | -4.149763 | -1.570306 | 3.116759  |
| C | -2.439036 | 0.540368  | 2.825845  |
| H | -1.558958 | 0.690322  | 2.191333  |
| H | -2.595702 | 1.484665  | 3.364374  |
| H | -2.206728 | -0.238527 | 3.558558  |

### C2

| Atom | X        | Y         | Z         |
|------|----------|-----------|-----------|
| C    | 4.981509 | -1.047979 | 1.172197  |
| C    | 3.613820 | -0.760061 | 1.043825  |
| C    | 2.920690 | -1.326665 | -0.047843 |
| C    | 3.578059 | -2.190866 | -0.932610 |
| C    | 4.938053 | -2.457107 | -0.789153 |
| C    | 5.643284 | -1.872658 | 0.263049  |
| H    | 5.519981 | -0.628524 | 2.016973  |
| H    | 3.012197 | -2.642193 | -1.742366 |
| H    | 5.439118 | -3.119661 | -1.489061 |
| H    | 6.703698 | -2.073488 | 0.389890  |
| C    | 1.460820 | -1.087221 | -0.299751 |

|           |           |           |           |   |           |           |           |
|-----------|-----------|-----------|-----------|---|-----------|-----------|-----------|
| O         | 0.684998  | -2.062865 | -0.285322 | C | -4.716297 | 2.988023  | -1.189084 |
| N         | 0.990519  | 0.164286  | -0.533444 | C | -5.690702 | 2.663551  | -0.245175 |
| H         | -0.035851 | 0.211113  | -0.550701 | H | -6.149789 | 1.512577  | 1.515823  |
| C         | 1.660167  | 1.387200  | -0.797721 | H | -2.705390 | 2.603669  | -1.860936 |
| C         | 1.008099  | 2.568262  | -0.416353 | H | -4.918026 | 3.726524  | -1.959873 |
| C         | 2.882591  | 1.461190  | -1.477280 | H | -6.663804 | 3.146593  | -0.273421 |
| C         | 1.583491  | 3.806590  | -0.690284 | C | -1.860885 | 0.725400  | -0.212349 |
| H         | 0.050427  | 2.505564  | 0.093001  | O | -0.865141 | 1.593063  | -0.078038 |
| C         | 3.458129  | 2.706319  | -1.730450 | N | -1.611371 | -0.532579 | -0.374458 |
| H         | 3.375511  | 0.557948  | -1.815887 | H | -0.040987 | -1.137864 | -0.210052 |
| C         | 2.817120  | 3.882845  | -1.339778 | C | -2.574936 | -1.518337 | -0.686630 |
| H         | 1.065986  | 4.713728  | -0.390374 | C | -2.456528 | -2.766196 | -0.053490 |
| H         | 4.408374  | 2.752282  | -2.255671 | C | -3.560888 | -1.349351 | -1.672020 |
| H         | 3.268062  | 4.848513  | -1.549611 | C | -3.328355 | -3.805554 | -0.368422 |
| C         | 2.945488  | 0.069057  | 2.094401  | H | -1.675519 | -2.905539 | 0.688347  |
| C         | 3.371439  | 1.310846  | 2.355493  | C | -4.428499 | -2.395743 | -1.984311 |
| H         | 4.163137  | 1.778061  | 1.777176  | H | -3.637405 | -0.405056 | -2.200214 |
| H         | 2.922312  | 1.908379  | 3.144788  | C | -4.322922 | -3.625627 | -1.332644 |
| C         | 1.846209  | -0.590912 | 2.898285  | H | -3.225708 | -4.762014 | 0.137700  |
| H         | 1.044180  | -0.984593 | 2.264623  | H | -5.185489 | -2.248410 | -2.750539 |
| H         | 2.243339  | -1.447187 | 3.459365  | H | -4.998849 | -4.438730 | -1.582754 |
| H         | 1.406303  | 0.112674  | 3.611677  | C | -3.900719 | 0.160053  | 1.971768  |
| C         | -2.493016 | -0.952959 | -0.730166 | C | -4.696766 | -0.893257 | 2.191440  |
| O         | -1.923875 | 0.117829  | -0.534853 | H | -5.506783 | -1.149085 | 1.514758  |
| C         | -4.002077 | -1.012645 | -1.033891 | H | -4.542974 | -1.550657 | 3.043406  |
| O         | -4.355470 | -1.624237 | -2.027308 | C | -2.767731 | 0.519882  | 2.908054  |
| C         | -4.951440 | -0.294624 | -0.142138 | H | -2.953090 | 1.493773  | 3.380157  |
| C         | -4.547037 | 0.396795  | 1.011171  | H | -2.660383 | -0.230080 | 3.697716  |
| C         | -6.317007 | -0.355216 | -0.469236 | H | -1.808572 | 0.605138  | 2.386307  |
| C         | -5.497622 | 1.016518  | 1.821096  | C | 5.407686  | -1.734232 | 0.754405  |
| H         | -3.495150 | 0.461858  | 1.263838  | C | 4.164591  | -1.085825 | 0.827574  |
| C         | -7.260874 | 0.266873  | 0.339688  | C | 3.199989  | -1.394234 | -0.155601 |
| H         | -6.609856 | -0.898648 | -1.361676 | C | 3.474273  | -2.359789 | -1.133708 |
| C         | -6.851897 | 0.953666  | 1.487787  | C | 4.716283  | -2.987940 | -1.189233 |
| H         | -5.180308 | 1.551525  | 2.711809  | C | 5.690693  | -2.663527 | -0.245309 |
| H         | -8.314948 | 0.217240  | 0.081091  | H | 6.149789  | -1.512661 | 1.515752  |
| H         | -7.589618 | 1.438762  | 2.121581  | H | 2.705375  | -2.603542 | -1.861049 |
| O         | -1.922207 | -2.133415 | -0.775184 | H | 4.918007  | -3.726398 | -1.960062 |
| H         | -0.926090 | -2.055323 | -0.607064 | H | 6.663791  | -3.146574 | -0.273585 |
|           |           |           |           | C | 1.860877  | -0.725374 | -0.212361 |
|           |           |           |           | O | 0.865135  | -1.593045 | -0.078088 |
|           |           |           |           | N | 1.611361  | 0.532606  | -0.374454 |
|           |           |           |           | H | 0.040983  | 1.137889  | -0.210023 |
|           |           |           |           | C | 2.574923  | 1.518364  | -0.686621 |
|           |           |           |           | C | 2.456495  | 2.766234  | -0.053505 |
|           |           |           |           | C | 3.560908  | 1.349359  | -1.671975 |
| <b>C3</b> |           |           |           |   |           |           |           |
| Atom      | X         | Y         | Z         |   |           |           |           |
| C         | -5.407687 | 1.734200  | 0.754488  |   |           |           |           |
| C         | -4.164588 | 1.085799  | 0.827616  |   |           |           |           |
| C         | -3.199994 | 1.394262  | -0.155550 |   |           |           |           |
| C         | -3.474283 | 2.359873  | -1.133602 |   |           |           |           |

|   |          |           |           |
|---|----------|-----------|-----------|
| C | 3.328331 | 3.805588  | -0.368428 |
| H | 1.675461 | 2.905591  | 0.688305  |
| C | 4.428528 | 2.395748  | -1.984257 |
| H | 3.637445 | 0.405051  | -2.200146 |
| C | 4.322928 | 3.625645  | -1.332616 |
| H | 3.225666 | 4.762058  | 0.137675  |
| H | 5.185545 | 2.248400  | -2.750456 |
| H | 4.998863 | 4.438744  | -1.582717 |
| C | 3.900739 | -0.160148 | 1.971783  |
| C | 4.696837 | 0.893106  | 2.191540  |
| H | 5.506880 | 1.148938  | 1.514892  |
| H | 4.543062 | 1.550460  | 3.043544  |
| C | 2.767710 | -0.519965 | 2.908024  |
| H | 1.808542 | -0.605054 | 2.386261  |
| H | 2.952963 | -1.493930 | 3.380020  |
| H | 2.660440 | 0.229925  | 3.697767  |

#### C4

| Atom | X         | Y         | Z         |
|------|-----------|-----------|-----------|
| C    | 5.007699  | -0.798114 | 1.141208  |
| C    | 3.618990  | -0.614852 | 1.049086  |
| C    | 2.936659  | -1.265766 | -0.001042 |
| C    | 3.630860  | -2.107698 | -0.880561 |
| C    | 5.009698  | -2.271713 | -0.771462 |
| C    | 5.701058  | -1.603232 | 0.238832  |
| H    | 5.538396  | -0.312726 | 1.954866  |
| H    | 3.079606  | -2.622693 | -1.661902 |
| H    | 5.536519  | -2.918946 | -1.466743 |
| H    | 6.776517  | -1.722892 | 0.338474  |
| C    | 1.467897  | -1.099838 | -0.233808 |
| O    | 0.819313  | -2.255889 | -0.128965 |
| N    | 0.831012  | -0.010258 | -0.514546 |
| H    | -0.782621 | 0.066320  | -0.662147 |
| C    | 1.447424  | 1.233144  | -0.803907 |
| C    | 0.866186  | 2.389295  | -0.261555 |
| C    | 2.526633  | 1.365176  | -1.690778 |
| C    | 1.377973  | 3.647911  | -0.568280 |
| H    | 0.014890  | 2.287503  | 0.405236  |
| C    | 3.032648  | 2.628671  | -1.994880 |
| H    | 2.957554  | 0.482344  | -2.150360 |
| C    | 2.467171  | 3.774566  | -1.433153 |
| H    | 0.919789  | 4.532610  | -0.134149 |
| H    | 3.868097  | 2.715265  | -2.684724 |
| H    | 2.862143  | 4.756702  | -1.677508 |
| C    | 2.926820  | 0.194781  | 2.098402  |
| C    | 3.284934  | 1.464655  | 2.323314  |

|   |           |           |           |
|---|-----------|-----------|-----------|
| H | 4.030848  | 1.965533  | 1.713231  |
| H | 2.821597  | 2.051799  | 3.112155  |
| C | 1.888373  | -0.509570 | 2.944302  |
| H | 1.082198  | -0.941412 | 2.341500  |
| H | 2.342538  | -1.342779 | 3.496452  |
| H | 1.441628  | 0.178976  | 3.668080  |
| C | -2.388581 | -1.007923 | -0.813979 |
| O | -1.813545 | 0.171920  | -0.771912 |
| C | -3.895845 | -0.952136 | -1.123150 |
| O | -4.268002 | -1.467145 | -2.163066 |
| C | -4.820410 | -0.312282 | -0.151509 |
| C | -4.372494 | 0.279469  | 1.039433  |
| C | -6.195006 | -0.334867 | -0.440845 |
| C | -5.289195 | 0.840043  | 1.927576  |
| H | -3.311812 | 0.316692  | 1.264421  |
| C | -7.105896 | 0.227396  | 0.446069  |
| H | -6.520365 | -0.801082 | -1.365218 |
| C | -6.653649 | 0.814828  | 1.632663  |
| H | -4.938905 | 1.298507  | 2.848005  |
| H | -8.168069 | 0.208457  | 0.218568  |
| H | -7.366117 | 1.252999  | 2.326568  |
| O | -1.821677 | -2.088085 | -0.680284 |
| H | -0.149899 | -2.157440 | -0.361026 |

#### 1a-2

| Atom | X         | Y         | Z         |
|------|-----------|-----------|-----------|
| C    | -2.191734 | -0.903805 | 1.487694  |
| C    | -1.389599 | 0.039123  | 0.825605  |
| C    | -1.420633 | 0.058042  | -0.585741 |
| C    | -2.268173 | -0.813869 | -1.283558 |
| C    | -3.054153 | -1.742505 | -0.605217 |
| C    | -3.006046 | -1.792754 | 0.787829  |
| H    | -2.183845 | -0.914564 | 2.573593  |
| H    | -2.293997 | -0.766305 | -2.368297 |
| H    | -3.699122 | -2.417664 | -1.160507 |
| H    | -3.614472 | -2.510273 | 1.331877  |
| C    | -0.550450 | 0.964714  | -1.394872 |
| O    | -1.293771 | 1.788191  | -2.182665 |
| N    | 0.719223  | 1.063299  | -1.459991 |
| C    | 1.636241  | 0.204768  | -0.827778 |
| C    | 2.772430  | 0.784761  | -0.240035 |
| C    | 1.527351  | -1.195943 | -0.851667 |
| C    | 3.751904  | -0.011849 | 0.347104  |
| H    | 2.865429  | 1.866671  | -0.250763 |
| C    | 2.518220  | -1.988169 | -0.272297 |
| H    | 0.674529  | -1.659526 | -1.336878 |

|           |           |           |           |   |           |           |           |
|-----------|-----------|-----------|-----------|---|-----------|-----------|-----------|
| C         | 3.630295  | -1.403826 | 0.336416  | H | -2.768792 | -1.891039 | 2.096393  |
| H         | 4.619227  | 0.455833  | 0.806293  | C | -5.556842 | -1.758218 | 0.331953  |
| H         | 2.420406  | -3.070564 | -0.303011 | H | -6.324624 | -2.311119 | 0.888070  |
| H         | 4.400110  | -2.025754 | 0.784980  | H | -6.086065 | -1.073938 | -0.342005 |
| C         | -0.598655 | 1.011585  | 1.640520  | C | -4.605747 | -2.694453 | -0.383513 |
| C         | 0.285463  | 0.576636  | 2.546356  | C | -3.300172 | -2.584313 | 0.108107  |
| H         | 0.507818  | -0.479443 | 2.667649  | C | -4.904741 | -3.627664 | -1.376586 |
| H         | 0.837885  | 1.269714  | 3.175632  | C | -2.282628 | -3.418685 | -0.353386 |
| C         | -0.906999 | 2.481974  | 1.460882  | C | -3.882533 | -4.446731 | -1.863995 |
| H         | -1.957000 | 2.689212  | 1.705904  | H | -5.917048 | -3.723807 | -1.762483 |
| H         | -0.274741 | 3.095156  | 2.110278  | C | -2.583570 | -4.347487 | -1.352130 |
| H         | -0.755163 | 2.813679  | 0.428197  | H | -1.287420 | -3.345575 | 0.070764  |
| H         | -0.644217 | 2.291901  | -2.711139 | H | -4.102062 | -5.175644 | -2.640001 |
| <b>A1</b> |           |           |           | H | -1.800493 | -4.996215 | -1.733497 |
| Atom      | X         | Y         | Z         | C | 6.186050  | -1.572380 | -0.364381 |
| Pd        | -0.372060 | -0.293048 | 0.400546  | C | 4.864907  | -1.372516 | -0.803512 |
| C         | -0.158726 | -1.592747 | 2.989705  | C | 3.836520  | -1.501782 | 0.156830  |
| O         | -0.598477 | -2.615646 | 2.460748  | C | 4.140836  | -1.834813 | 1.483694  |
| O         | 0.023899  | -0.442050 | 2.398694  | C | 5.457004  | -2.047792 | 1.885811  |
| C         | 0.228271  | -1.564409 | 4.467649  | C | 6.483963  | -1.915521 | 0.952142  |
| H         | 1.293602  | -1.330113 | 4.574402  | H | 6.998183  | -1.474625 | -1.078010 |
| H         | -0.328021 | -0.778292 | 4.989614  | H | 3.330243  | -1.927943 | 2.200805  |
| H         | 0.021855  | -2.532703 | 4.927683  | H | 5.675061  | -2.309904 | 2.917099  |
| C         | -3.239925 | 0.675770  | 0.619467  | H | 7.517610  | -2.076965 | 1.246169  |
| O         | -4.538740 | 0.430691  | 0.881984  | C | 2.372690  | -1.350642 | -0.144361 |
| N         | -2.423001 | -0.309457 | 0.757718  | O | 1.804733  | -2.444931 | -0.586099 |
| C         | -3.988810 | 2.864593  | -0.331301 | N | 1.689463  | -0.272499 | 0.120560  |
| C         | -3.697826 | 4.149425  | -0.720661 | C | 2.360113  | 0.960572  | 0.412420  |
| C         | -2.379897 | 4.647559  | -0.571059 | C | 2.425479  | 1.448968  | 1.723998  |
| C         | -1.400911 | 3.762780  | -0.008466 | C | 2.910869  | 1.705568  | -0.638068 |
| C         | -2.939714 | 2.065881  | 0.202119  | C | 3.073097  | 2.658791  | 1.978507  |
| H         | -2.737629 | 6.630047  | -1.367369 | H | 1.952250  | 0.882619  | 2.517653  |
| H         | -4.986701 | 2.453606  | -0.424643 | C | 3.557079  | 2.914462  | -0.373464 |
| H         | -4.469179 | 4.790723  | -1.140270 | H | 2.827873  | 1.328457  | -1.652080 |
| C         | -1.993401 | 5.962051  | -0.940387 | C | 3.647028  | 3.392323  | 0.935980  |
| C         | -0.069065 | 4.224378  | 0.171513  | H | 3.128978  | 3.028806  | 2.998948  |
| C         | 0.272072  | 5.505412  | -0.197905 | H | 3.986696  | 3.483115  | -1.194139 |
| C         | -0.694177 | 6.380455  | -0.757422 | H | 4.156270  | 4.329924  | 1.142770  |
| H         | 0.654482  | 3.541229  | 0.602051  | C | 4.626120  | -0.991529 | -2.229802 |
| H         | 1.292909  | 5.850586  | -0.061615 | C | 3.682962  | -1.571343 | -2.987119 |
| H         | -0.403391 | 7.387922  | -1.042266 | H | 3.038842  | -2.360253 | -2.618522 |
| N         | -1.701209 | 2.490314  | 0.364922  | H | 3.541012  | -1.266732 | -4.021252 |
| C         | -4.655836 | -0.961816 | 1.298563  | C | 5.532435  | 0.079596  | -2.802296 |
| H         | -5.037520 | -0.940378 | 2.321290  | H | 6.576816  | -0.252863 | -2.856928 |
| C         | -3.202957 | -1.510045 | 1.171054  | H | 5.519629  | 0.982021  | -2.178994 |
|           |           |           |           | H | 5.221075  | 0.349928  | -3.815955 |

|   |           |           |           |
|---|-----------|-----------|-----------|
| C | -0.607239 | -0.905828 | -2.455436 |
| O | -0.801486 | 0.016750  | -1.581886 |
| O | -0.014086 | -1.991403 | -2.269533 |
| C | -1.206007 | -0.628507 | -3.825089 |
| H | -1.332970 | 0.443182  | -3.992974 |
| H | -0.578575 | -1.068191 | -4.604198 |
| H | -2.190957 | -1.108118 | -3.875485 |
| H | 0.928687  | -2.239474 | -1.104865 |

## A2

| Atom | X         | Y         | Z         |
|------|-----------|-----------|-----------|
| C    | -3.354159 | -1.033477 | -2.598274 |
| C    | -2.242275 | -1.505372 | -1.886074 |
| C    | -2.400596 | -2.565562 | -0.973029 |
| C    | -3.670859 | -3.124277 | -0.793259 |
| C    | -4.775439 | -2.641345 | -1.492554 |
| C    | -4.616522 | -1.595585 | -2.403597 |
| H    | -3.222825 | -0.226089 | -3.313983 |
| H    | -3.762313 | -3.952372 | -0.098686 |
| H    | -5.754659 | -3.084913 | -1.333704 |
| H    | -5.467686 | -1.220591 | -2.966059 |
| C    | -1.256126 | -3.211898 | -0.222536 |
| O    | -1.369301 | -4.409289 | 0.068576  |
| C    | 1.036954  | -3.008715 | 0.550093  |
| C    | 2.267562  | -2.439230 | 0.172816  |
| C    | 1.054792  | -4.088606 | 1.454518  |
| C    | 3.472852  | -2.923719 | 0.675849  |
| H    | 2.267092  | -1.595467 | -0.511200 |
| C    | 2.267424  | -4.571771 | 1.946767  |
| H    | 0.122612  | -4.551539 | 1.743998  |
| C    | 3.482626  | -3.998541 | 1.566936  |
| H    | 4.406132  | -2.459932 | 0.364679  |
| H    | 2.256625  | -5.408900 | 2.641067  |
| H    | 4.420893  | -4.383752 | 1.957638  |
| C    | -0.903297 | -0.887989 | -2.141478 |
| C    | -0.714788 | 0.454827  | -1.939303 |
| H    | -1.544774 | 1.093732  | -1.657051 |
| H    | 0.201129  | 0.942251  | -2.259344 |
| C    | 0.101240  | -1.714689 | -2.910555 |
| H    | 0.218912  | -2.714289 | -2.490337 |
| H    | -0.269528 | -1.822299 | -3.939422 |
| H    | 1.078655  | -1.226083 | -2.946598 |
| Pd   | -0.223757 | -0.391940 | 0.144583  |
| C    | -0.781148 | -0.836526 | 2.912349  |
| O    | -1.961470 | -0.635906 | 2.612341  |
| O    | 0.241987  | -0.678743 | 2.112450  |

|   |           |           |           |
|---|-----------|-----------|-----------|
| C | -0.372243 | -1.314398 | 4.300731  |
| H | -0.024717 | -2.350951 | 4.229338  |
| H | 0.461515  | -0.719148 | 4.686202  |
| H | -1.223415 | -1.261187 | 4.982597  |
| N | -0.148140 | -2.446902 | 0.007475  |
| C | 0.762367  | 2.491674  | 0.718237  |
| O | 0.531951  | 3.656657  | 1.361590  |
| N | -0.221909 | 1.665161  | 0.642455  |
| C | 3.178821  | 3.087875  | 0.871850  |
| C | 4.474899  | 2.931099  | 0.445001  |
| C | 4.760827  | 2.041885  | -0.619341 |
| C | 3.656346  | 1.340007  | -1.205614 |
| C | 2.157389  | 2.331253  | 0.233478  |
| H | 6.902488  | 2.356763  | -0.672392 |
| H | 2.924448  | 3.762826  | 1.679496  |
| H | 5.284673  | 3.483434  | 0.915108  |
| C | 6.069412  | 1.823378  | -1.123314 |
| C | 3.903537  | 0.448473  | -2.284856 |
| C | 5.184325  | 0.256956  | -2.750238 |
| C | 6.276249  | 0.948372  | -2.165769 |
| H | 3.057864  | -0.072374 | -2.721145 |
| H | 5.365416  | -0.430402 | -3.571536 |
| H | 7.280059  | 0.782789  | -2.546258 |
| N | 2.377034  | 1.495291  | -0.765549 |
| C | -0.875719 | 3.683101  | 1.725370  |
| H | -0.917262 | 3.927403  | 2.787633  |
| C | -1.376508 | 2.252139  | 1.387759  |
| H | -1.562254 | 1.605778  | 2.247724  |
| C | -1.679343 | 4.676532  | 0.850314  |
| H | -2.060703 | 5.516766  | 1.441868  |
| H | -1.025431 | 5.103240  | 0.079017  |
| C | -2.792960 | 3.831228  | 0.265407  |
| C | -2.628927 | 2.475601  | 0.574256  |
| C | -3.904616 | 4.251945  | -0.464677 |
| C | -3.576156 | 1.525237  | 0.192319  |
| C | -4.844711 | 3.301279  | -0.873685 |
| H | -4.047439 | 5.302814  | -0.704910 |
| C | -4.685793 | 1.950188  | -0.543694 |
| H | -3.451804 | 0.484362  | 0.476468  |
| H | -5.716236 | 3.618382  | -1.440487 |
| H | -5.431491 | 1.224281  | -0.854052 |

## A2-1

| Atom | X        | Y         | Z        |
|------|----------|-----------|----------|
| C    | 1.724664 | -3.245297 | 2.583331 |
| C    | 1.368903 | -2.800666 | 1.300695 |

|    |           |           |           |           |           |           |           |
|----|-----------|-----------|-----------|-----------|-----------|-----------|-----------|
| C  | 2.380804  | -2.448106 | 0.390136  | H         | -3.195572 | -1.886751 | -0.144301 |
| C  | 3.723116  | -2.570272 | 0.774182  | H         | -5.459333 | -2.761263 | 0.304173  |
| C  | 4.068293  | -3.014399 | 2.048902  | H         | -7.179645 | -1.326983 | 1.388054  |
| C  | 3.064614  | -3.348034 | 2.958989  | N         | -2.326790 | 0.543845  | 0.468233  |
| H  | 0.944410  | -3.533290 | 3.282635  | C         | 0.722283  | 3.779170  | -0.669794 |
| H  | 4.483966  | -2.313304 | 0.044633  | H         | 0.448696  | 4.206967  | -1.636516 |
| H  | 5.113847  | -3.105063 | 2.327879  | C         | 1.266869  | 2.318028  | -0.724712 |
| H  | 3.318800  | -3.696033 | 3.955838  | H         | 1.620381  | 2.017667  | -1.714059 |
| C  | 2.130911  | -1.956299 | -1.005787 | C         | 1.713932  | 4.622339  | 0.137628  |
| O  | 3.006531  | -2.084229 | -1.860564 | H         | 2.307503  | 5.245756  | -0.543533 |
| C  | 0.616161  | -0.910798 | -2.585010 | H         | 1.188577  | 5.304234  | 0.815013  |
| C  | -0.653113 | -1.173462 | -3.143942 | C         | 2.574249  | 3.595000  | 0.840486  |
| C  | 1.526457  | -0.111691 | -3.312026 | C         | 2.349250  | 2.305531  | 0.341822  |
| C  | -1.021166 | -0.623198 | -4.372035 | C         | 3.528296  | 3.808432  | 1.835074  |
| H  | -1.329274 | -1.842263 | -2.618076 | C         | 3.079845  | 1.218513  | 0.820263  |
| C  | 1.158494  | 0.411884  | -4.546588 | C         | 4.252671  | 2.718852  | 2.324660  |
| H  | 2.523437  | 0.048476  | -2.921383 | H         | 3.709134  | 4.806818  | 2.224393  |
| C  | -0.116816 | 0.171760  | -5.076636 | C         | 4.031637  | 1.432754  | 1.819384  |
| H  | -2.000936 | -0.838778 | -4.788292 | H         | 2.916575  | 0.220484  | 0.430805  |
| H  | 1.873196  | 1.006612  | -5.108626 | H         | 4.996967  | 2.873020  | 3.100543  |
| H  | -0.390421 | 0.584553  | -6.043147 | H         | 4.603454  | 0.592936  | 2.202919  |
| C  | -0.085098 | -2.819768 | 0.952386  |           |           |           |           |
| C  | -0.946861 | -2.017568 | 1.656534  | <b>A3</b> |           |           |           |
| H  | -0.572296 | -1.380491 | 2.453950  | Atom      | X         | Y         | Z         |
| H  | -2.015388 | -2.198107 | 1.640513  | C         | -2.884015 | -1.514600 | -2.913799 |
| C  | -0.557254 | -3.939013 | 0.058549  | C         | -2.130201 | -1.860593 | -1.792953 |
| H  | -0.007388 | -3.948891 | -0.886330 | C         | -2.769688 | -2.315158 | -0.642253 |
| H  | -0.355633 | -4.894007 | 0.561066  | C         | -4.156777 | -2.446517 | -0.562650 |
| H  | -1.629767 | -3.878334 | -0.149541 | C         | -4.909559 | -2.105767 | -1.684785 |
| Pd | -0.534356 | -0.566018 | -0.126334 | C         | -4.274198 | -1.647402 | -2.849953 |
| N  | 0.886475  | -1.432384 | -1.300029 | H         | -2.409181 | -1.148207 | -3.819872 |
| C  | -0.809768 | 2.317971  | 0.094937  | H         | -4.616756 | -2.803811 | 0.353452  |
| O  | -0.544440 | 3.622893  | 0.073350  | H         | -5.991849 | -2.195909 | -1.661983 |
| N  | 0.071073  | 1.504703  | -0.380167 | H         | -4.874240 | -1.391115 | -3.719231 |
| C  | -3.068236 | 2.767306  | 1.089600  | C         | -1.777425 | -2.679324 | 0.383569  |
| C  | -4.301824 | 2.281032  | 1.458745  | O         | -1.945245 | -3.263017 | 1.428428  |
| C  | -4.609992 | 0.917714  | 1.246278  | C         | 0.618029  | -3.178179 | 0.232164  |
| C  | -3.591434 | 0.063116  | 0.700666  | C         | 1.760600  | -2.695466 | 0.872699  |
| C  | -2.112458 | 1.860967  | 0.592228  | C         | 0.502419  | -4.547144 | -0.042302 |
| H  | -6.655817 | 1.032358  | 1.937461  | C         | 2.796460  | -3.573138 | 1.204833  |
| H  | -2.811491 | 3.816615  | 1.171018  | H         | 1.820407  | -1.643697 | 1.133070  |
| H  | -5.056880 | 2.942048  | 1.874678  | C         | 1.536201  | -5.418764 | 0.295396  |
| C  | -5.899192 | 0.381903  | 1.508160  | H         | -0.400532 | -4.933414 | -0.504950 |
| C  | -3.934137 | -1.269279 | 0.353369  | C         | 2.690518  | -4.933239 | 0.914249  |
| C  | -5.204417 | -1.745755 | 0.591973  | H         | 3.678398  | -3.187740 | 1.709011  |
| C  | -6.189809 | -0.925439 | 1.196063  | H         | 1.434894  | -6.478767 | 0.079565  |



|    |           |           |           |           |           |           |           |
|----|-----------|-----------|-----------|-----------|-----------|-----------|-----------|
| H  | 3.493961  | -5.614296 | 1.181333  | C         | -3.396515 | 4.401967  | -1.243289 |
| C  | -0.627059 | -1.779097 | -1.612984 | C         | -3.196281 | 1.771516  | -0.240875 |
| C  | -0.140278 | -0.327260 | -1.543304 | C         | -4.270282 | 3.404378  | -1.683456 |
| H  | -0.816320 | 0.381503  | -2.027946 | H         | -3.490374 | 5.418405  | -1.618768 |
| H  | 0.882363  | -0.205627 | -1.914063 | C         | -4.176734 | 2.101138  | -1.179675 |
| C  | 0.128816  | -2.645702 | -2.622312 | H         | -3.128344 | 0.776478  | 0.187068  |
| H  | -0.215714 | -3.684494 | -2.628322 | H         | -5.040325 | 3.647706  | -2.411297 |
| H  | -0.034401 | -2.225751 | -3.621020 | H         | -4.875867 | 1.339783  | -1.514004 |
| H  | 1.204273  | -2.632943 | -2.423085 |           |           |           |           |
| Pd | -0.179925 | -0.198774 | 0.480283  | <b>A4</b> |           |           |           |
| C  | -1.291259 | -0.318881 | 3.186809  | Atom      | X         | Y         | Z         |
| O  | -2.318933 | 0.143275  | 2.659213  | C         | -1.401920 | -2.642432 | -2.884495 |
| O  | -0.148576 | -0.460714 | 2.596138  | C         | -1.940551 | -2.455912 | -1.612849 |
| C  | -1.318250 | -0.797422 | 4.636510  | C         | -3.259340 | -2.811762 | -1.358751 |
| H  | -1.386744 | -1.891808 | 4.641663  | C         | -4.087646 | -3.355302 | -2.338967 |
| H  | -0.395957 | -0.522594 | 5.157670  | C         | -3.553701 | -3.536970 | -3.614235 |
| H  | -2.186479 | -0.389155 | 5.159590  | C         | -2.222999 | -3.180121 | -3.880946 |
| N  | -0.468794 | -2.277438 | -0.128790 | H         | -0.372186 | -2.376199 | -3.107992 |
| C  | 0.987075  | 2.665599  | 0.544250  | H         | -5.112754 | -3.621818 | -2.099409 |
| O  | 0.769409  | 3.954880  | 0.892655  | H         | -4.167082 | -3.955437 | -4.407303 |
| N  | -0.008970 | 1.859432  | 0.660514  | H         | -1.822238 | -3.325289 | -4.880859 |
| C  | 3.221802  | 3.505805  | -0.186455 | C         | -3.595922 | -2.491601 | 0.043109  |
| C  | 4.494015  | 3.267535  | -0.644344 | O         | -4.677504 | -2.658565 | 0.588131  |
| C  | 4.926602  | 1.935714  | -0.856765 | C         | -2.399690 | -1.262775 | 1.842604  |
| C  | 3.989625  | 0.888428  | -0.571195 | C         | -1.163969 | -0.961702 | 2.480034  |
| C  | 2.365224  | 2.394834  | 0.062250  | C         | -3.590040 | -0.837129 | 2.466548  |
| H  | 6.927044  | 2.399943  | -1.543878 | C         | -1.154803 | -0.298039 | 3.724878  |
| H  | 2.861256  | 4.511623  | -0.013586 | H         | -0.238372 | -1.467451 | 2.199485  |
| H  | 5.174301  | 4.091358  | -0.846359 | C         | -3.544475 | -0.155913 | 3.679435  |
| C  | 6.221661  | 1.600513  | -1.330233 | H         | -4.540832 | -1.062095 | 2.007792  |
| C  | 4.385779  | -0.462801 | -0.771127 | C         | -2.333703 | 0.120079  | 4.324088  |
| C  | 5.649172  | -0.754407 | -1.233134 | H         | -0.194151 | -0.146479 | 4.199291  |
| C  | 6.574888  | 0.282624  | -1.514883 | H         | -4.482036 | 0.159715  | 4.131086  |
| H  | 3.668554  | -1.244754 | -0.545985 | H         | -2.317858 | 0.636534  | 5.279005  |
| H  | 5.944751  | -1.789001 | -1.383569 | C         | -1.278745 | -1.925191 | -0.345667 |
| H  | 7.567566  | 0.031191  | -1.877716 | C         | -0.787524 | -0.478681 | -0.539035 |
| N  | 2.731562  | 1.138112  | -0.115399 | H         | -1.630641 | 0.143379  | -0.864640 |
| C  | -0.618285 | 4.078137  | 1.312562  | H         | -0.038772 | -0.476042 | -1.341002 |
| H  | -0.595772 | 4.448447  | 2.339082  | C         | -0.158823 | -2.923594 | 0.033439  |
| C  | -1.178558 | 2.633767  | 1.169295  | H         | -0.584049 | -3.912168 | 0.236107  |
| H  | -1.511255 | 2.155604  | 2.093086  | H         | 0.533723  | -3.017583 | -0.809460 |
| C  | -1.412558 | 4.997261  | 0.356362  | H         | 0.431037  | -2.608992 | 0.894521  |
| H  | -1.911179 | 5.800818  | 0.912711  | Pd        | 0.095454  | 0.445272  | 1.060773  |
| H  | -0.730763 | 5.480450  | -0.354061 | C         | 2.030715  | 0.707005  | 3.187429  |
| C  | -2.413652 | 4.074772  | -0.307858 | O         | 2.018329  | -0.537383 | 3.128520  |
| C  | -2.307145 | 2.764748  | 0.170240  | O         | 1.203563  | 1.487963  | 2.573543  |

|           |           |           |           |    |           |           |           |
|-----------|-----------|-----------|-----------|----|-----------|-----------|-----------|
| C         | 3.085456  | 1.425393  | 4.027235  | C  | 5.017571  | 0.341799  | 0.006441  |
| H         | 3.851581  | 1.842921  | 3.362104  | C  | 6.273083  | 0.930174  | -0.128472 |
| H         | 2.641731  | 2.260033  | 4.578897  | C  | 6.398181  | 2.281712  | 0.194234  |
| H         | 3.564823  | 0.728963  | 4.719259  | C  | 5.284675  | 3.009538  | 0.640781  |
| N         | -2.432192 | -1.945019 | 0.613973  | H  | 3.178004  | 2.983427  | 1.119471  |
| C         | 1.852165  | 1.853316  | -1.048108 | H  | 7.115560  | 0.339181  | -0.475594 |
| O         | 2.149549  | 2.991323  | -1.712652 | H  | 7.361017  | 2.777057  | 0.101641  |
| N         | 0.843454  | 1.888031  | -0.252254 | H  | 5.398955  | 4.061853  | 0.888836  |
| C         | 3.491072  | 0.599202  | -2.495246 | C  | 4.624459  | -1.058326 | -0.278612 |
| C         | 4.329458  | -0.480098 | -2.652287 | O  | 5.365768  | -1.940136 | -0.697774 |
| C         | 4.467382  | -1.427160 | -1.605434 | C  | 2.429829  | -2.252650 | -0.318435 |
| C         | 3.703778  | -1.205300 | -0.411302 | C  | 1.039045  | -2.087629 | -0.544280 |
| C         | 2.759896  | 0.707439  | -1.281532 | C  | 3.027521  | -3.522038 | -0.451731 |
| H         | 5.898382  | -2.734022 | -2.576908 | C  | 0.342730  | -3.214655 | -1.024679 |
| H         | 3.377716  | 1.351428  | -3.267622 | C  | 2.289079  | -4.615618 | -0.895242 |
| H         | 4.898058  | -0.610814 | -3.569939 | H  | 4.082381  | -3.629227 | -0.244994 |
| C         | 5.321118  | -2.558668 | -1.672219 | C  | 0.941207  | -4.462622 | -1.210167 |
| C         | 3.833895  | -2.094932 | 0.690993  | H  | -0.712797 | -3.114262 | -1.265181 |
| C         | 4.676831  | -3.178972 | 0.589661  | H  | 2.778913  | -5.580216 | -1.003241 |
| C         | 5.417870  | -3.415791 | -0.597847 | H  | 0.356604  | -5.298928 | -1.587055 |
| H         | 3.269299  | -1.865404 | 1.592052  | C  | 2.694130  | 0.141890  | 0.494327  |
| H         | 4.783948  | -3.861431 | 1.428149  | C  | 1.595773  | 0.624594  | -0.457686 |
| H         | 6.074562  | -4.279769 | -0.653482 | H  | 1.984362  | 0.647324  | -1.482943 |
| N         | 2.856336  | -0.151909 | -0.284838 | H  | 1.303976  | 1.646063  | -0.178411 |
| C         | 1.179973  | 4.000090  | -1.304098 | C  | 2.213885  | 0.003728  | 1.954168  |
| H         | 1.759704  | 4.834600  | -0.907036 | H  | 3.046007  | -0.285107 | 2.605254  |
| C         | 0.309314  | 3.269562  | -0.235173 | H  | 1.811171  | 0.958597  | 2.311853  |
| H         | 0.436181  | 3.649400  | 0.783832  | H  | 1.421850  | -0.746204 | 2.023479  |
| C         | 0.250032  | 4.415171  | -2.466996 | Pd | -0.124649 | -0.443747 | -0.364340 |
| H         | 0.331252  | 5.488900  | -2.674776 | N  | 3.262082  | -1.146754 | 0.014019  |
| H         | 0.544038  | 3.892152  | -3.385327 | C  | -2.711958 | 0.863961  | -0.941443 |
| C         | -1.137595 | 4.030338  | -1.995611 | O  | -3.526806 | 1.724676  | -1.586956 |
| C         | -1.108333 | 3.404660  | -0.744764 | N  | -1.500075 | 1.230366  | -0.709354 |
| C         | -2.355163 | 4.248478  | -2.641863 | C  | -4.636737 | -0.699084 | -0.557064 |
| C         | -2.285976 | 2.998656  | -0.116222 | C  | -5.095914 | -1.879026 | -0.022662 |
| C         | -3.536216 | 3.833177  | -2.021841 | C  | -4.189036 | -2.763187 | 0.610194  |
| H         | -2.388616 | 4.737397  | -3.612548 | C  | -2.797530 | -2.404888 | 0.624783  |
| C         | -3.503295 | 3.214506  | -0.766322 | C  | -3.250379 | -0.425628 | -0.491747 |
| H         | -2.253240 | 2.513960  | 0.855966  | H  | -5.654463 | -4.233510 | 1.219561  |
| H         | -4.489893 | 3.997982  | -2.516111 | H  | -5.301107 | 0.022173  | -1.018153 |
| H         | -4.430042 | 2.902507  | -0.293037 | H  | -6.152314 | -2.132445 | -0.059368 |
|           |           |           |           | C  | -4.601161 | -3.965708 | 1.240276  |
|           |           |           |           | C  | -1.874801 | -3.246378 | 1.301858  |
|           |           |           |           | C  | -2.314401 | -4.397385 | 1.916765  |
|           |           |           |           | C  | -3.681956 | -4.767189 | 1.878904  |
|           |           |           |           | H  | -0.831721 | -2.955518 | 1.319453  |
| <b>A5</b> |           |           |           |    |           |           |           |
| Atom      | X         | Y         | Z         |    |           |           |           |
| C         | 4.030265  | 2.404507  | 0.771918  |    |           |           |           |
| C         | 3.908143  | 1.055515  | 0.443283  |    |           |           |           |

|   |           |           |           |    |           |           |           |
|---|-----------|-----------|-----------|----|-----------|-----------|-----------|
| H | -1.602740 | -5.031979 | 2.436634  | C  | 1.878733  | -2.227546 | 0.610415  |
| H | -4.003902 | -5.683756 | 2.364875  | H  | 2.608348  | -2.901157 | 1.082146  |
| N | -2.348755 | -1.260133 | 0.028083  | H  | 1.082389  | -2.836564 | 0.176945  |
| C | -2.695026 | 2.862369  | -1.984951 | C  | 1.586428  | -0.916552 | -1.562547 |
| H | -2.585267 | 2.799506  | -3.070374 | H  | 2.039790  | -0.166473 | -2.218262 |
| C | -1.378826 | 2.622807  | -1.183016 | H  | 1.313325  | -1.787746 | -2.169327 |
| H | -0.470566 | 2.720987  | -1.785121 | H  | 0.673367  | -0.503392 | -1.118144 |
| C | -3.306002 | 4.186618  | -1.502558 | Pd | -0.681094 | -0.536619 | 1.289062  |
| H | -3.159311 | 4.964957  | -2.263199 | N  | 3.007558  | -0.149303 | 0.338203  |
| H | -4.386964 | 4.086778  | -1.353996 | C  | -3.056861 | 1.103056  | 0.032968  |
| C | -2.545177 | 4.502325  | -0.231819 | O  | -4.391215 | 1.198626  | -0.204830 |
| C | -1.454861 | 3.641949  | -0.057705 | N  | -2.636486 | 0.035243  | 0.618303  |
| C | -2.801975 | 5.509767  | 0.698604  | C  | -2.907013 | 3.452935  | -0.826544 |
| C | -0.614321 | 3.770002  | 1.048205  | C  | -2.137383 | 4.528558  | -1.198837 |
| C | -1.959448 | 5.643196  | 1.804697  | C  | -0.724204 | 4.435081  | -1.148669 |
| H | -3.647521 | 6.181000  | 0.569317  | C  | -0.162869 | 3.189467  | -0.709766 |
| C | -0.873192 | 4.778027  | 1.979508  | C  | -2.250968 | 2.264399  | -0.399794 |
| H | 0.218554  | 3.088051  | 1.190746  | H  | -0.282925 | 6.440348  | -1.838320 |
| H | -2.151347 | 6.422522  | 2.537206  | H  | -3.989232 | 3.493030  | -0.848365 |
| H | -0.229168 | 4.888550  | 2.847492  | H  | -2.601421 | 5.455029  | -1.528796 |

#### A6

| Atom | X        | Y         | Z         | Atom | X         | Y         | Z         |
|------|----------|-----------|-----------|------|-----------|-----------|-----------|
| C    | 4.165705 | -2.878615 | -1.891025 | C    | 1.250787  | 3.051349  | -0.640618 |
| C    | 3.886782 | -1.794830 | -1.062479 | C    | 2.065939  | 4.104337  | -0.988872 |
| C    | 4.896675 | -0.883291 | -0.736385 | C    | 1.511047  | 5.334826  | -1.425737 |
| C    | 6.200786 | -1.031768 | -1.203382 | H    | 1.655842  | 2.104743  | -0.301129 |
| C    | 6.483702 | -2.126093 | -2.022075 | H    | 3.144713  | 3.993715  | -0.924577 |
| C    | 5.474874 | -3.039866 | -2.359121 | H    | 2.171979  | 6.153452  | -1.697079 |
| H    | 3.393462 | -3.592688 | -2.165644 | N    | -0.936583 | 2.130799  | -0.352308 |
| H    | 6.964169 | -0.311281 | -0.924589 | C    | -5.026060 | 0.033384  | 0.388697  |
| H    | 7.490830 | -2.274839 | -2.401706 | H    | -5.626211 | 0.395370  | 1.227743  |
| H    | 5.713988 | -3.888973 | -2.994072 | C    | -3.810333 | -0.850124 | 0.798582  |
| C    | 4.364636 | 0.146776  | 0.196250  | H    | -3.837829 | -1.181045 | 1.840469  |
| O    | 4.967755 | 1.045886  | 0.762522  | C    | -5.849148 | -0.745875 | -0.653984 |
| C    | 2.252039 | -0.046346 | 1.524757  | H    | -6.806718 | -1.064029 | -0.220903 |
| C    | 1.393554 | -1.191681 | 1.629716  | H    | -6.084974 | -0.108699 | -1.513911 |
| C    | 2.375501 | 0.893618  | 2.529224  | C    | -4.977951 | -1.934261 | -1.005075 |
| C    | 0.646763 | -1.372135 | 2.827562  | C    | -3.849929 | -2.007762 | -0.180967 |
| C    | 1.612470 | 0.704826  | 3.705187  | C    | -5.195900 | -2.905045 | -1.984007 |
| H    | 3.068592 | 1.719703  | 2.428000  | C    | -2.927224 | -3.044963 | -0.317485 |
| C    | 0.770721 | -0.385373 | 3.855241  | C    | -4.274083 | -3.945062 | -2.125579 |
| H    | 0.213888 | -2.339226 | 3.073730  | H    | -6.069303 | -2.855163 | -2.629923 |
| H    | 1.699258 | 1.430729  | 4.509266  | C    | -3.147226 | -4.015541 | -1.297382 |
| H    | 0.215538 | -0.521471 | 4.779413  | H    | -2.046720 | -3.073791 | 0.319827  |
| C    | 2.575248 | -1.336498 | -0.457346 | H    | -4.433450 | -4.705789 | -2.885309 |
|      |          |           |           | H    | -2.438844 | -4.830690 | -1.419358 |

**B1**

| Atom | X         | Y         | Z         |
|------|-----------|-----------|-----------|
| Pd   | -0.206164 | -0.324578 | 0.150004  |
| C    | 0.058826  | -0.673542 | 3.044943  |
| O    | -0.279630 | -1.856955 | 2.921322  |
| O    | 0.234208  | 0.177700  | 2.076240  |
| C    | 0.348297  | -0.094872 | 4.428323  |
| H    | 1.356834  | -0.395524 | 4.735804  |
| H    | 0.294438  | 0.996062  | 4.431747  |
| H    | -0.355452 | -0.513001 | 5.153416  |
| C    | -3.150919 | 0.374090  | 0.718464  |
| O    | -4.350628 | -0.065368 | 1.150737  |
| N    | -2.213110 | -0.504102 | 0.637718  |
| C    | -4.305809 | 2.555420  | 0.310164  |
| C    | -4.236313 | 3.899567  | 0.035476  |
| C    | -2.973306 | 4.520427  | -0.125932 |
| C    | -1.809353 | 3.690845  | 0.001156  |
| C    | -3.090391 | 1.822184  | 0.408159  |
| H    | -3.696595 | 6.528988  | -0.492740 |
| H    | -5.254236 | 2.051769  | 0.450586  |
| H    | -5.141630 | 4.495237  | -0.053615 |
| C    | -2.811991 | 5.904205  | -0.395190 |
| C    | -0.520868 | 4.276590  | -0.135663 |
| C    | -0.400969 | 5.622850  | -0.394461 |
| C    | -1.551481 | 6.442313  | -0.526767 |
| H    | 0.346865  | 3.634299  | -0.034088 |
| H    | 0.584842  | 6.066614  | -0.501023 |
| H    | -1.432736 | 7.502566  | -0.732664 |
| N    | -1.893630 | 2.358459  | 0.257642  |
| C    | -4.206520 | -1.469253 | 1.523197  |
| H    | -4.338564 | -1.510399 | 2.606737  |
| C    | -2.770724 | -1.824317 | 1.042455  |
| H    | -2.116200 | -2.220344 | 1.822661  |
| C    | -5.204034 | -2.354761 | 0.753966  |
| H    | -5.695173 | -3.058230 | 1.438583  |
| H    | -5.995948 | -1.741836 | 0.307587  |
| C    | -4.351833 | -3.078678 | -0.267057 |
| C    | -2.990764 | -2.799272 | -0.098836 |
| C    | -4.772063 | -3.972045 | -1.253356 |
| C    | -2.030492 | -3.420657 | -0.897938 |
| C    | -3.814147 | -4.585725 | -2.063484 |
| H    | -5.828308 | -4.193724 | -1.387434 |
| C    | -2.452585 | -4.314967 | -1.883497 |
| H    | -0.976177 | -3.201775 | -0.765667 |
| H    | -4.128498 | -5.283948 | -2.834955 |
| H    | -1.716420 | -4.803407 | -2.516046 |

|   |           |           |           |
|---|-----------|-----------|-----------|
| C | 6.223093  | 0.735810  | 0.194831  |
| C | 4.847505  | 0.577125  | 0.433616  |
| C | 3.956230  | 0.924430  | -0.606849 |
| C | 4.450890  | 1.465359  | -1.805380 |
| C | 5.818727  | 1.606380  | -2.019678 |
| C | 6.709782  | 1.225853  | -1.015620 |
| H | 6.912860  | 0.489996  | 0.996501  |
| H | 3.743854  | 1.756497  | -2.576066 |
| H | 6.183164  | 2.012977  | -2.958757 |
| H | 7.781276  | 1.331968  | -1.163137 |
| C | 2.472525  | 0.752459  | -0.542945 |
| O | 1.810950  | 1.854822  | -0.836221 |
| N | 1.831987  | -0.356749 | -0.282890 |
| C | 2.445100  | -1.647358 | -0.334981 |
| C | 3.275006  | -2.006210 | -1.408134 |
| C | 2.131295  | -2.603387 | 0.642825  |
| C | 3.819323  | -3.288536 | -1.476395 |
| H | 3.485542  | -1.286627 | -2.191759 |
| C | 2.677412  | -3.883911 | 0.561599  |
| H | 1.450816  | -2.353001 | 1.450596  |
| C | 3.528274  | -4.232443 | -0.490108 |
| H | 4.461193  | -3.550628 | -2.313435 |
| H | 2.429290  | -4.613030 | 1.328286  |
| H | 3.947513  | -5.233257 | -0.548866 |
| C | 4.418065  | 0.147746  | 1.798683  |
| C | 4.893856  | -0.985793 | 2.330975  |
| H | 5.523341  | -1.665733 | 1.764112  |
| H | 4.639845  | -1.282955 | 3.345266  |
| C | 3.523472  | 1.090615  | 2.573113  |
| H | 2.504473  | 1.119403  | 2.172078  |
| H | 3.921136  | 2.113277  | 2.548060  |
| H | 3.453008  | 0.775750  | 3.619176  |
| H | 0.926261  | 1.632484  | -1.327143 |
| C | -0.564310 | 0.235505  | -2.679263 |
| O | -0.681648 | -0.701846 | -1.806512 |
| O | -0.040665 | 1.356395  | -2.494627 |
| C | -1.160843 | -0.092075 | -4.039255 |
| H | -0.937632 | -1.125748 | -4.316550 |
| H | -2.251403 | 0.005088  | -3.982702 |
| H | -0.783259 | 0.597720  | -4.796482 |

**B2**

| Atom | X         | Y         | Z        |
|------|-----------|-----------|----------|
| Pd   | -0.461785 | -0.261882 | 0.183344 |
| C    | -0.693782 | 0.203176  | 3.133984 |
| O    | -1.614460 | 1.015311  | 2.997787 |

|   |           |           |           |             |           |           |           |
|---|-----------|-----------|-----------|-------------|-----------|-----------|-----------|
| O | -0.070842 | -0.433459 | 2.183889  | C           | 2.834154  | -2.830062 | -3.031076 |
| C | -0.189192 | -0.188957 | 4.520426  | H           | 1.611442  | -1.239918 | -3.817393 |
| H | -0.579927 | -1.181921 | 4.770435  | H           | 2.090796  | -4.614039 | -0.224127 |
| H | 0.902566  | -0.252017 | 4.536206  | H           | 3.826001  | -4.462137 | -2.023984 |
| H | -0.541385 | 0.530184  | 5.263129  | H           | 3.570829  | -2.756255 | -3.826493 |
| C | 0.807091  | 2.587572  | 0.475247  | C           | -0.136013 | -3.255709 | 0.071559  |
| O | 0.575073  | 3.901335  | 0.683786  | O           | -0.173189 | -4.374505 | 0.596298  |
| N | -0.225926 | 1.835694  | 0.310598  | N           | -1.032045 | -2.248786 | 0.297843  |
| C | 3.201042  | 3.159611  | 0.913978  | C           | -2.331490 | -2.521096 | 0.787344  |
| C | 4.520056  | 2.779121  | 0.968615  | C           | -2.951524 | -3.777785 | 0.590227  |
| C | 4.884742  | 1.454274  | 0.626303  | C           | -3.099833 | -1.505369 | 1.390768  |
| C | 3.833694  | 0.564292  | 0.222891  | C           | -4.270670 | -3.990778 | 0.980007  |
| C | 2.236032  | 2.197594  | 0.505463  | H           | -2.384013 | -4.590897 | 0.158697  |
| H | 7.013406  | 1.652650  | 0.973378  | C           | -4.421940 | -1.733621 | 1.777288  |
| H | 2.887234  | 4.162023  | 1.176588  | H           | -2.661287 | -0.534308 | 1.588632  |
| H | 5.288005  | 3.484031  | 1.277586  | C           | -5.023354 | -2.974632 | 1.574761  |
| C | 6.219755  | 0.975450  | 0.667446  | H           | -4.712994 | -4.970872 | 0.816174  |
| C | 4.153106  | -0.777387 | -0.118221 | H           | -4.975326 | -0.926352 | 2.251332  |
| C | 5.458080  | -1.210291 | -0.063333 | H           | -6.050990 | -3.151549 | 1.880523  |
| C | 6.498942  | -0.329729 | 0.328690  | C           | -0.427402 | -1.153162 | -2.092339 |
| H | 3.344718  | -1.439125 | -0.405694 | C           | -0.257425 | 0.209219  | -2.042260 |
| H | 5.695095  | -2.238621 | -0.320303 | H           | 0.738104  | 0.637123  | -1.980458 |
| H | 7.522291  | -0.692796 | 0.364914  | H           | -1.070829 | 0.874248  | -2.314949 |
| N | 2.533225  | 0.957349  | 0.161568  | C           | -1.727416 | -1.755510 | -2.573107 |
| C | -0.856955 | 4.115683  | 0.565860  | H           | -1.984638 | -2.671648 | -2.040010 |
| H | -1.162571 | 4.668522  | 1.454831  | H           | -1.606535 | -2.008354 | -3.635899 |
| C | -1.447112 | 2.682004  | 0.490114  | H           | -2.554305 | -1.046192 | -2.479799 |
| H | -1.909968 | 2.327240  | 1.414298  |             |           |           |           |
| C | -1.228663 | 4.842791  | -0.749821 | <b>B2-1</b> |           |           |           |
| H | -1.609941 | 5.852850  | -0.561490 | Atom        | X         | Y         | Z         |
| H | -0.335729 | 4.953147  | -1.378658 | Pd          | -0.891819 | -0.355789 | -0.327145 |
| C | -2.271009 | 3.941464  | -1.380375 | C           | 0.613942  | 2.518430  | 0.108816  |
| C | -2.399129 | 2.734402  | -0.681824 | O           | 1.320826  | 3.666546  | 0.260726  |
| C | -3.078758 | 4.201151  | -2.488203 | N           | 1.216829  | 1.469892  | -0.304470 |
| C | -3.355781 | 1.788386  | -1.055604 | C           | -1.319264 | 3.912184  | 0.818794  |
| C | -4.018746 | 3.244821  | -2.882070 | C           | -2.663490 | 4.079041  | 1.045714  |
| H | -2.989583 | 5.137875  | -3.033113 | C           | -3.548864 | 2.997298  | 0.842201  |
| C | -4.162381 | 2.049857  | -2.166835 | C           | -2.995238 | 1.743759  | 0.420379  |
| H | -3.476008 | 0.868801  | -0.488553 | C           | -0.835012 | 2.649608  | 0.400527  |
| H | -4.656156 | 3.438879  | -3.740571 | H           | -5.353083 | 4.071204  | 1.355539  |
| H | -4.915237 | 1.326771  | -2.468411 | H           | -0.615025 | 4.723339  | 0.946444  |
| C | 1.734345  | -1.972013 | -3.023262 | H           | -3.054795 | 5.038799  | 1.371637  |
| C | 0.765885  | -2.055092 | -2.011105 | C           | -4.950905 | 3.114924  | 1.033315  |
| C | 0.915270  | -3.009219 | -0.986382 | C           | -3.878621 | 0.655601  | 0.193013  |
| C | 2.020869  | -3.868804 | -1.009589 | C           | -5.235428 | 0.805556  | 0.381632  |
| C | 2.977114  | -3.783324 | -2.019699 | C           | -5.780331 | 2.041182  | 0.808799  |

|   |           |           |           |           |           |           |           |
|---|-----------|-----------|-----------|-----------|-----------|-----------|-----------|
| H | -3.470101 | -0.294069 | -0.138569 | C         | -1.197558 | -0.854892 | 1.860943  |
| H | -5.896994 | -0.035655 | 0.197743  | H         | -2.236353 | -1.163249 | 1.939341  |
| H | -6.851816 | 2.136452  | 0.953333  | H         | -0.928696 | 0.082732  | 2.339206  |
| N | -1.638467 | 1.593515  | 0.225875  | C         | 1.246515  | -1.494138 | 1.751942  |
| C | 2.707196  | 3.337649  | -0.038453 | H         | 1.863246  | -1.914175 | 0.953480  |
| H | 3.040269  | 4.058254  | -0.786282 | H         | 1.555924  | -1.990948 | 2.682055  |
| C | 2.626226  | 1.866619  | -0.557164 | H         | 1.457176  | -0.426647 | 1.831508  |
| H | 2.800604  | 1.766237  | -1.634404 |           |           |           |           |
| C | 3.594011  | 3.335913  | 1.228869  | <b>B3</b> |           |           |           |
| H | 4.365018  | 4.112879  | 1.179460  | Atom      | X         | Y         | Z         |
| H | 2.982821  | 3.554661  | 2.113452  | Pd        | -0.474006 | -0.114747 | 0.342930  |
| C | 4.188624  | 1.942476  | 1.263951  | C         | -1.469477 | 0.407275  | 3.105003  |
| C | 3.659974  | 1.124138  | 0.259033  | O         | -2.494094 | 0.888055  | 2.579620  |
| C | 5.172427  | 1.449895  | 2.122718  | O         | -0.439699 | -0.042934 | 2.473305  |
| C | 4.118513  | -0.181648 | 0.082472  | C         | -1.377493 | 0.288421  | 4.625778  |
| C | 5.620752  | 0.136648  | 1.960100  | H         | -1.481066 | -0.765685 | 4.909162  |
| H | 5.595607  | 2.079637  | 2.900992  | H         | -0.397181 | 0.622962  | 4.979935  |
| C | 5.102106  | -0.674270 | 0.943194  | H         | -2.170489 | 0.865982  | 5.106743  |
| H | 3.725754  | -0.802721 | -0.718710 | C         | 0.765716  | 2.701346  | 0.424285  |
| H | 6.390779  | -0.253863 | 2.619266  | O         | 0.536613  | 4.019426  | 0.619976  |
| H | 5.476069  | -1.686082 | 0.815708  | N         | -0.265784 | 1.950955  | 0.258075  |
| C | -1.150254 | -3.916875 | 2.375139  | C         | 3.125039  | 3.228019  | 1.050780  |
| C | -0.579968 | -3.208470 | 1.307104  | C         | 4.450419  | 2.871982  | 1.101949  |
| C | -0.222873 | -3.904366 | 0.136400  | C         | 4.863586  | 1.626686  | 0.568603  |
| C | -0.388059 | -5.293567 | 0.075865  | C         | 3.850858  | 0.789686  | -0.006358 |
| C | -0.940552 | -5.989699 | 1.149089  | C         | 2.198357  | 2.318785  | 0.466997  |
| C | -1.335114 | -5.297903 | 2.295375  | H         | 6.974351  | 1.818819  | 1.013854  |
| H | -1.411827 | -3.387333 | 3.287332  | H         | 2.775355  | 4.173623  | 1.445653  |
| H | -0.094590 | -5.807729 | -0.833267 | H         | 5.187090  | 3.536281  | 1.547204  |
| H | -1.071069 | -7.065814 | 1.087514  | C         | 6.210909  | 1.181207  | 0.574650  |
| H | -1.772442 | -5.831066 | 3.134331  | C         | 4.224211  | -0.464317 | -0.560904 |
| C | 0.237932  | -3.230443 | -1.115631 | C         | 5.539882  | -0.866830 | -0.539248 |
| O | 0.957666  | -3.793627 | -1.932266 | C         | 6.541221  | -0.040366 | 0.031960  |
| N | -0.378522 | -2.009891 | -1.397284 | H         | 3.445527  | -1.082804 | -0.992394 |
| C | -0.001394 | -1.177109 | -2.427992 | H         | 5.816490  | -1.828945 | -0.961012 |
| C | 1.273943  | -1.089894 | -3.051727 | H         | 7.574112  | -0.377320 | 0.040303  |
| C | -0.997142 | -0.185934 | -2.718899 | N         | 2.539930  | 1.150493  | -0.043727 |
| C | 1.531536  | -0.028520 | -3.894611 | C         | -0.901122 | 4.233595  | 0.572393  |
| H | 2.005129  | -1.866874 | -2.872943 | H         | -1.177896 | 4.684911  | 1.526854  |
| C | -0.679405 | 0.913108  | -3.550813 | C         | -1.484814 | 2.806795  | 0.357066  |
| H | -2.039693 | -0.425870 | -2.517614 | H         | -2.068113 | 2.412132  | 1.195488  |
| C | 0.572074  | 0.989762  | -4.128593 | C         | -1.299432 | 5.103044  | -0.642342 |
| H | 2.495668  | 0.031859  | -4.392409 | H         | -1.840811 | 6.002227  | -0.323932 |
| H | -1.443130 | 1.650252  | -3.780333 | H         | -0.400101 | 5.444165  | -1.169547 |
| H | 0.814349  | 1.806078  | -4.802591 | C         | -2.169262 | 4.194238  | -1.485462 |
| C | -0.221625 | -1.778053 | 1.538653  | C         | -2.290149 | 2.920233  | -0.919058 |

|           |           |           |           |   |           |           |           |
|-----------|-----------|-----------|-----------|---|-----------|-----------|-----------|
| C         | -2.849389 | 4.509097  | -2.662740 | O | 2.190451  | 0.880624  | 3.227008  |
| C         | -3.119593 | 1.959228  | -1.498644 | C | 2.945392  | -0.938115 | 4.615467  |
| C         | -3.658289 | 3.539526  | -3.260253 | H | 3.493858  | -1.830574 | 4.296337  |
| H         | -2.761310 | 5.498085  | -3.106384 | H | 3.636414  | -0.199041 | 5.026696  |
| C         | -3.799496 | 2.274715  | -2.677377 | H | 2.251291  | -1.253894 | 5.403618  |
| H         | -3.238087 | 0.986112  | -1.032009 | C | 1.401826  | -2.294709 | -0.966682 |
| H         | -4.194447 | 3.774765  | -4.175936 | O | 2.436581  | -2.941743 | -1.549393 |
| H         | -4.450233 | 1.537120  | -3.139475 | N | 1.696619  | -1.341044 | -0.154588 |
| C         | 1.634536  | -2.847564 | -2.746328 | C | -0.091313 | -3.577022 | -2.517823 |
| C         | 0.816787  | -2.704596 | -1.624616 | C | -1.346269 | -4.031305 | -2.845591 |
| C         | 1.228633  | -3.220752 | -0.398499 | C | -2.448866 | -3.718590 | -2.012129 |
| C         | 2.435649  | -3.905233 | -0.245692 | C | -2.187233 | -2.928735 | -0.843534 |
| C         | 3.243589  | -4.064220 | -1.369924 | C | 0.057222  | -2.792434 | -1.340733 |
| C         | 2.843210  | -3.536529 | -2.608482 | H | -3.972813 | -4.744010 | -3.160842 |
| H         | 1.340693  | -2.443245 | -3.711090 | H | 0.773291  | -3.801808 | -3.130553 |
| H         | 2.715418  | -4.301870 | 0.725541  | H | -1.503307 | -4.630321 | -3.739280 |
| H         | 4.185006  | -4.600994 | -1.292679 | C | -3.776457 | -4.145392 | -2.274680 |
| H         | 3.482276  | -3.670229 | -3.477410 | C | -3.261536 | -2.592356 | 0.025138  |
| C         | 0.183270  | -3.015949 | 0.621068  | C | -4.537588 | -3.020914 | -0.261264 |
| O         | 0.137372  | -3.449542 | 1.748018  | C | -4.797553 | -3.802435 | -1.416734 |
| N         | -0.882041 | -2.238793 | -0.006696 | H | -3.039724 | -1.992699 | 0.902187  |
| C         | -2.228629 | -2.673136 | 0.360956  | H | -5.358042 | -2.759482 | 0.400873  |
| C         | -2.562521 | -4.029336 | 0.237825  | H | -5.812600 | -4.130166 | -1.623042 |
| C         | -3.176166 | -1.765050 | 0.835020  | N | -0.940795 | -2.485912 | -0.532225 |
| C         | -3.845451 | -4.466427 | 0.559450  | C | 3.660481  | -2.288919 | -1.110001 |
| H         | -1.817503 | -4.744475 | -0.098199 | H | 4.303941  | -3.077056 | -0.716879 |
| C         | -4.463335 | -2.211063 | 1.151477  | C | 3.176024  | -1.272749 | -0.035151 |
| H         | -2.907074 | -0.726972 | 1.012371  | H | 3.421437  | -1.548929 | 0.994317  |
| C         | -4.804363 | -3.555225 | 1.009887  | C | 4.329313  | -1.481079 | -2.248185 |
| H         | -4.092743 | -5.519970 | 0.461597  | H | 5.315765  | -1.887514 | -2.500902 |
| H         | -5.188464 | -1.496719 | 1.530694  | H | 3.718546  | -1.545360 | -3.157589 |
| H         | -5.804365 | -3.896714 | 1.263372  | C | 4.412681  | -0.069698 | -1.702797 |
| C         | -0.531892 | -2.022155 | -1.526469 | C | 3.783227  | 0.045328  | -0.458106 |
| C         | -0.425995 | -0.496860 | -1.645613 | C | 5.037886  | 1.038377  | -2.275695 |
| H         | 0.518808  | -0.153839 | -2.073835 | C | 3.780890  | 1.250339  | 0.246562  |
| H         | -1.273063 | -0.054819 | -2.178158 | C | 5.025475  | 2.253689  | -1.585444 |
| C         | -1.561268 | -2.639737 | -2.475812 | H | 5.535413  | 0.959771  | -3.239484 |
| H         | -1.649687 | -3.723717 | -2.358454 | C | 4.407194  | 2.357590  | -0.333395 |
| H         | -1.243469 | -2.429938 | -3.503133 | H | 3.306631  | 1.317880  | 1.223847  |
| H         | -2.547446 | -2.190400 | -2.328777 | H | 5.513295  | 3.122684  | -2.019528 |
|           |           |           |           | H | 4.423010  | 3.304708  | 0.199087  |
| <b>B4</b> |           |           |           | C | -0.337752 | 3.320229  | -2.583765 |
| Atom      | X         | Y         | Z         | C | -1.089568 | 3.021836  | -1.448896 |
| Pd        | 0.477409  | -0.209833 | 1.111294  | C | -2.407641 | 3.450651  | -1.355496 |
| C         | 2.156807  | -0.346437 | 3.448137  | C | -3.029016 | 4.177805  | -2.369364 |
| O         | 1.468512  | -1.201552 | 2.765429  | C | -2.282651 | 4.471083  | -3.510048 |

|   |           |           |           |   |           |           |           |
|---|-----------|-----------|-----------|---|-----------|-----------|-----------|
| C | -0.950177 | 4.042611  | -3.612988 | H | -0.898899 | -3.266177 | 0.019575  |
| H | 0.697350  | 3.002537  | -2.676931 | H | -1.629588 | -5.631482 | -0.021827 |
| H | -4.061043 | 4.496616  | -2.257411 | H | -4.000676 | -6.211832 | -0.514706 |
| H | -2.730632 | 5.033423  | -4.324551 | N | -2.420837 | -1.181521 | -0.425056 |
| H | -0.382306 | 4.278137  | -4.509399 | C | -2.710608 | 3.329191  | -1.356569 |
| C | -2.987471 | 2.991266  | -0.077805 | H | -2.711069 | 3.542328  | -2.429014 |
| O | -4.130325 | 3.183220  | 0.312329  | C | -1.339321 | 2.861192  | -0.784198 |
| N | -1.970769 | 2.278913  | 0.586009  | H | -0.485856 | 3.112955  | -1.421297 |
| C | -2.188097 | 1.436408  | 1.689970  | C | -3.205922 | 4.497975  | -0.493369 |
| C | -1.099437 | 0.910364  | 2.438414  | H | -3.071702 | 5.444009  | -1.035038 |
| C | -3.493964 | 1.056468  | 2.063861  | H | -4.276573 | 4.401308  | -0.281692 |
| C | -1.340733 | 0.037302  | 3.519190  | C | -2.332168 | 4.435437  | 0.741668  |
| H | -0.104239 | 1.375942  | 2.397595  | C | -1.273867 | 3.533463  | 0.578218  |
| C | -3.698393 | 0.184358  | 3.129080  | C | -2.464775 | 5.156657  | 1.928376  |
| H | -4.337772 | 1.459701  | 1.525084  | C | -0.339249 | 3.334362  | 1.594904  |
| C | -2.630298 | -0.341498 | 3.863713  | C | -1.529764 | 4.961911  | 2.947860  |
| H | -0.489004 | -0.338916 | 4.071787  | H | -3.285037 | 5.857748  | 2.062310  |
| H | -4.719247 | -0.087489 | 3.387391  | C | -0.475440 | 4.056357  | 2.782917  |
| H | -2.805648 | -1.019406 | 4.693485  | H | 0.464942  | 2.616163  | 1.473930  |
| C | -0.675649 | 2.293521  | -0.175439 | H | -1.624516 | 5.515441  | 3.878171  |
| C | -0.228082 | 0.850953  | -0.483844 | H | 0.240907  | 3.908376  | 3.586055  |
| H | -1.062920 | 0.301080  | -0.934071 | C | 4.154142  | 1.413451  | -2.286837 |
| H | 0.591495  | 0.892603  | -1.210275 | C | 3.948631  | 0.462825  | -1.288482 |
| C | 0.405595  | 3.162557  | 0.511138  | C | 5.007242  | 0.053786  | -0.486332 |
| H | 0.007727  | 4.161728  | 0.718242  | C | 6.292590  | 0.570489  | -0.633481 |
| H | 1.259374  | 3.266869  | -0.166317 | C | 6.501268  | 1.526931  | -1.627555 |
| H | 0.786866  | 2.735129  | 1.439167  | C | 5.439556  | 1.941911  | -2.445932 |

### B5

| Atom | X         | Y         | Z         |   |           |           |           |
|------|-----------|-----------|-----------|---|-----------|-----------|-----------|
| Pd   | -0.173039 | -0.200805 | 0.015893  | H | 3.342597  | 1.743526  | -2.930742 |
| C    | -2.722512 | 1.126243  | -0.872233 | H | 7.093804  | 0.227032  | 0.014318  |
| O    | -3.554381 | 2.147806  | -1.167653 | H | 7.489793  | 1.954192  | -1.773365 |
| N    | -1.474419 | 1.391732  | -0.710883 | H | 5.619450  | 2.686739  | -3.217176 |
| C    | -4.633394 | -0.468783 | -1.130181 | C | 4.528617  | -0.954849 | 0.488376  |
| C    | -5.097831 | -1.761044 | -1.099961 | O | 5.209564  | -1.501818 | 1.348750  |
| C    | -4.210594 | -2.816117 | -0.778971 | N | 3.168749  | -1.131731 | 0.228295  |
| C    | -2.850167 | -2.479654 | -0.458518 | C | 2.268005  | -1.855519 | 1.059449  |
| C    | -3.279820 | -0.230162 | -0.790657 | C | 0.885416  | -1.546122 | 1.080393  |
| H    | -5.639449 | -4.422404 | -1.018768 | C | 2.782170  | -2.871790 | 1.889634  |
| H    | -5.268527 | 0.365450  | -1.403148 | C | 0.099829  | -2.217232 | 2.037729  |
| H    | -6.133793 | -1.986600 | -1.339808 | C | 1.960535  | -3.530486 | 2.800749  |
| C    | -4.606861 | -4.178378 | -0.782275 | H | 3.835188  | -3.108107 | 1.839849  |
| C    | -1.927530 | -3.527003 | -0.195298 | C | 0.612687  | -3.191598 | 2.897356  |
| C    | -2.345066 | -4.839003 | -0.221078 | H | -0.957843 | -1.968964 | 2.114164  |
| C    | -3.693240 | -5.170019 | -0.505367 | H | 2.385513  | -4.300897 | 3.439423  |
|      |           |           |           | H | -0.035309 | -3.678154 | 3.622953  |
|      |           |           |           | C | 2.683670  | -0.282841 | -0.894498 |
|      |           |           |           | C | 1.605254  | 0.687053  | -0.399402 |



|   |          |           |           |
|---|----------|-----------|-----------|
| H | 1.993636 | 1.243894  | 0.461479  |
| H | 1.368281 | 1.401928  | -1.199766 |
| C | 2.216696 | -1.162810 | -2.072382 |
| H | 3.040753 | -1.788368 | -2.431980 |
| H | 1.873585 | -0.531936 | -2.900526 |
| H | 1.385227 | -1.801346 | -1.764068 |

**B6**

| Atom | X         | Y         | Z         |
|------|-----------|-----------|-----------|
| Pd   | 0.653103  | -1.078958 | 0.011874  |
| C    | 2.625038  | 1.135272  | -1.056055 |
| O    | 3.752560  | 1.424297  | -1.757995 |
| N    | 2.362077  | -0.108629 | -0.847555 |
| C    | 2.380353  | 3.612988  | -0.761888 |
| C    | 1.644685  | 4.682574  | -0.311877 |
| C    | 0.382546  | 4.465075  | 0.295103  |
| C    | -0.068826 | 3.107544  | 0.404345  |
| C    | 1.843963  | 2.304605  | -0.600863 |
| H    | -0.096921 | 6.537303  | 0.704586  |
| H    | 3.349321  | 3.744795  | -1.227679 |
| H    | 2.021497  | 5.697441  | -0.414915 |
| C    | -0.441459 | 5.509301  | 0.788981  |
| C    | -1.329170 | 2.840766  | 1.006343  |
| C    | -2.102898 | 3.877283  | 1.477045  |
| C    | -1.657859 | 5.219999  | 1.367092  |
| H    | -1.648273 | 1.807475  | 1.083932  |
| H    | -3.063448 | 3.666029  | 1.938398  |
| H    | -2.284131 | 6.023745  | 1.744409  |
| N    | 0.667550  | 2.059364  | -0.049912 |
| C    | 4.331013  | 0.163791  | -2.193732 |
| H    | 4.214655  | 0.124627  | -3.280193 |
| C    | 3.486168  | -0.887992 | -1.415665 |
| H    | 3.076363  | -1.680428 | -2.048156 |
| C    | 5.794517  | 0.030491  | -1.735162 |
| H    | 6.404623  | -0.403640 | -2.538433 |
| H    | 6.220384  | 1.014705  | -1.509125 |
| C    | 5.725245  | -0.887846 | -0.532694 |
| C    | 4.441909  | -1.418439 | -0.362596 |
| C    | 6.753659  | -1.244456 | 0.340819  |
| C    | 4.164449  | -2.306282 | 0.676758  |
| C    | 6.480807  | -2.133993 | 1.382759  |
| H    | 7.753689  | -0.835682 | 0.216605  |
| C    | 5.194674  | -2.661299 | 1.550220  |
| H    | 3.156221  | -2.689314 | 0.809987  |
| H    | 7.273385  | -2.416741 | 2.070604  |
| H    | 4.995755  | -3.347975 | 2.368591  |

|   |           |           |           |
|---|-----------|-----------|-----------|
| C | -5.073417 | -1.554630 | -2.449346 |
| C | -4.481569 | -1.119190 | -1.266600 |
| C | -5.276498 | -0.642821 | -0.218545 |
| C | -6.666145 | -0.603853 | -0.308174 |
| C | -7.260190 | -1.053634 | -1.488328 |
| C | -6.469481 | -1.525768 | -2.545734 |
| H | -4.473913 | -1.918899 | -3.279758 |
| H | -7.255431 | -0.236570 | 0.526952  |
| H | -8.341722 | -1.040496 | -1.591642 |
| H | -6.949108 | -1.876756 | -3.455726 |
| C | -4.418737 | -0.290607 | 0.945291  |
| O | -4.759763 | 0.069681  | 2.061845  |
| N | -3.108044 | -0.502987 | 0.514934  |
| C | -2.053545 | -1.031883 | 1.286461  |
| C | -1.309455 | -1.959703 | 0.482606  |
| C | -1.813644 | -0.846123 | 2.633961  |
| C | -0.293708 | -2.735757 | 1.107588  |
| C | -0.786049 | -1.612633 | 3.232021  |
| H | -2.429185 | -0.170099 | 3.214724  |
| C | -0.045501 | -2.526448 | 2.500545  |
| H | 0.088467  | -3.636075 | 0.631322  |
| H | -0.585780 | -1.485390 | 4.292499  |
| H | 0.716847  | -3.125157 | 2.991925  |
| C | -3.018551 | -0.982894 | -0.895571 |
| C | -2.144776 | -2.263194 | -0.765700 |
| H | -2.779026 | -3.142587 | -0.584124 |
| H | -1.552928 | -2.448403 | -1.664747 |
| C | -2.331120 | 0.072989  | -1.783294 |
| H | -2.873298 | 1.022771  | -1.739175 |
| H | -2.314431 | -0.269892 | -2.824507 |
| H | -1.298379 | 0.231817  | -1.452294 |

**C-TS1**

| Atom | X        | Y         | Z         |
|------|----------|-----------|-----------|
| C    | 2.425184 | -0.062403 | -1.573134 |
| C    | 1.664538 | 0.354893  | -0.471513 |
| C    | 1.255089 | -0.621750 | 0.466181  |
| C    | 1.651841 | -1.956574 | 0.300970  |
| C    | 2.398118 | -2.352285 | -0.805666 |
| C    | 2.776265 | -1.400638 | -1.752317 |
| H    | 2.759696 | 0.686440  | -2.285215 |
| H    | 1.345698 | -2.681487 | 1.048721  |
| H    | 2.680350 | -3.394130 | -0.927701 |
| H    | 3.357966 | -1.693249 | -2.622295 |
| C    | 0.383770 | -0.326746 | 1.655978  |
| O    | 0.577113 | -0.858822 | 2.726438  |

|   |           |           |           |   |           |           |           |
|---|-----------|-----------|-----------|---|-----------|-----------|-----------|
| N | -0.746136 | 0.566115  | 1.477124  | H | -3.236053 | -4.777111 | -0.161956 |
| H | -0.467759 | 1.535036  | 1.363121  | H | -5.107051 | -2.020492 | -2.882389 |
| C | -1.765335 | 0.188479  | 0.579580  | H | -4.975821 | -4.294864 | -1.879340 |
| C | -2.467419 | 1.164869  | -0.146003 | C | -3.865660 | 0.078481  | 1.972240  |
| C | -2.143029 | -1.158062 | 0.446934  | C | -4.682241 | -0.972768 | 2.111890  |
| C | -3.517434 | 0.799489  | -0.985653 | H | -5.474624 | -1.180390 | 1.398776  |
| H | -2.187701 | 2.210719  | -0.045365 | H | -4.563835 | -1.675856 | 2.932474  |
| C | -3.184920 | -1.512461 | -0.407766 | C | -2.758652 | 0.373303  | 2.960954  |
| H | -1.635253 | -1.920708 | 1.030067  | H | -2.953687 | 1.318124  | 3.485499  |
| C | -3.880571 | -0.540984 | -1.129938 | H | -2.677934 | -0.423476 | 3.706706  |
| H | -4.050929 | 1.571263  | -1.534859 | H | -1.784272 | 0.485146  | 2.473575  |
| H | -3.461245 | -2.559843 | -0.498583 | C | 5.308333  | -1.743691 | 0.798118  |
| H | -4.696622 | -0.822989 | -1.788750 | C | 4.080370  | -1.067153 | 0.871137  |
| C | 1.427203  | 1.821947  | -0.288467 | C | 3.082038  | -1.407253 | -0.067031 |
| C | 0.750833  | 2.534765  | -1.198632 | C | 3.308589  | -2.429994 | -0.997795 |
| H | 0.290777  | 2.065671  | -2.063268 | C | 4.536931  | -3.084239 | -1.055612 |
| H | 0.631019  | 3.611183  | -1.100315 | C | 5.544790  | -2.729586 | -0.158705 |
| C | 2.092419  | 2.468430  | 0.909787  | H | 6.076178  | -1.497749 | 1.525773  |
| H | 1.806117  | 1.994318  | 1.857647  | H | 2.512459  | -2.697633 | -1.686416 |
| H | 3.183045  | 2.365509  | 0.840569  | H | 4.702170  | -3.866719 | -1.790907 |
| H | 1.851579  | 3.534210  | 0.972813  | H | 6.507600  | -3.232736 | -0.188914 |

### C-TS2

| Atom | X         | Y         | Z         |   |          |           |           |
|------|-----------|-----------|-----------|---|----------|-----------|-----------|
| C    | -5.308340 | 1.743651  | 0.798132  | O | 0.741593 | -1.531201 | 0.078866  |
| C    | -4.080379 | 1.067106  | 0.871117  | N | 1.547652 | 0.549580  | -0.325542 |
| C    | -3.082030 | 1.407276  | -0.067008 | H | 0.271671 | 1.053073  | -0.112975 |
| C    | -3.308567 | 2.430083  | -0.997702 | C | 2.519808 | 1.493633  | -0.731372 |
| C    | -4.536909 | 3.084333  | -1.055489 | C | 2.433405 | 2.785744  | -0.188584 |
| C    | -5.544781 | 2.729618  | -0.158623 | C | 3.483919 | 1.234050  | -1.717917 |
| H    | -6.076198 | 1.497653  | 1.525753  | C | 3.314522 | 3.784139  | -0.596908 |
| H    | -2.512427 | 2.697772  | -1.686292 | H | 1.670690 | 2.993318  | 0.556136  |
| H    | -4.702136 | 3.866866  | -1.790730 | C | 4.365161 | 2.238116  | -2.118188 |
| H    | -6.507591 | 3.232770  | -0.188811 | H | 3.534955 | 0.253297  | -2.177756 |
| C    | -1.746760 | 0.727190  | -0.114901 | C | 4.290201 | 3.515107  | -1.559387 |
| O    | -0.741594 | 1.531188  | 0.078962  | H | 3.236199 | 4.777109  | -0.161806 |
| N    | -1.547630 | -0.549537 | -0.325599 | H | 5.106903 | 2.020580  | -2.882534 |
| H    | -0.271648 | -1.053045 | -0.113078 | H | 4.975808 | 4.294907  | -1.879362 |
| C    | -2.519794 | -1.493584 | -0.731411 | C | 3.865642 | -0.078605 | 1.972330  |
| C    | -2.433314 | -2.785723 | -0.188701 | C | 4.682255 | 0.972605  | 2.112087  |
| C    | -3.483995 | -1.233977 | -1.717864 | H | 5.474648 | 1.180272  | 1.398997  |
| C    | -3.314439 | -3.784121 | -0.597000 | H | 4.563857 | 1.675625  | 2.932730  |
| H    | -1.670529 | -2.993316 | 0.555942  | C | 2.758570 | -0.373440 | 2.960969  |
| C    | -4.365242 | -2.238046 | -2.118113 | H | 1.784200 | -0.485196 | 2.473555  |
| H    | -3.535093 | -0.253207 | -2.177657 | H | 2.953561 | -1.318340 | 3.485391  |
| C    | -4.290206 | -3.515065 | -1.559382 | H | 2.677861 | 0.423243  | 3.706825  |

### C-TS3

| Atom | X         | Y         | Z         |
|------|-----------|-----------|-----------|
| C    | 4.927303  | -0.838893 | 1.161702  |
| C    | 3.542229  | -0.643207 | 1.047060  |
| C    | 2.875712  | -1.278078 | -0.023436 |
| C    | 3.577851  | -2.117793 | -0.899076 |
| C    | 4.953239  | -2.292327 | -0.767225 |
| C    | 5.630613  | -1.639137 | 0.262425  |
| H    | 5.446853  | -0.367835 | 1.990726  |
| H    | 3.036192  | -2.620794 | -1.694629 |
| H    | 5.487837  | -2.936335 | -1.459352 |
| H    | 6.703140  | -1.767849 | 0.380096  |
| C    | 1.414206  | -1.106643 | -0.279493 |
| O    | 0.753733  | -2.243424 | -0.233865 |
| N    | 0.800078  | 0.014086  | -0.534146 |
| H    | -0.522043 | 0.051565  | -0.600519 |
| C    | 1.418202  | 1.268950  | -0.786079 |
| C    | 0.790751  | 2.410586  | -0.267802 |
| C    | 2.544572  | 1.414393  | -1.607583 |
| C    | 1.306342  | 3.676562  | -0.536055 |
| H    | -0.099311 | 2.294759  | 0.342896  |
| C    | 3.055774  | 2.685338  | -1.867937 |
| H    | 3.009276  | 0.540782  | -2.050757 |
| C    | 2.445033  | 3.820153  | -1.331329 |
| H    | 0.812936  | 4.553034  | -0.125007 |
| H    | 3.929344  | 2.786564  | -2.506357 |
| H    | 2.844313  | 4.808023  | -1.543103 |
| C    | 2.836878  | 0.157938  | 2.094143  |
| C    | 3.199453  | 1.422637  | 2.340212  |
| H    | 3.959298  | 1.925751  | 1.749438  |
| H    | 2.726398  | 2.003282  | 3.127962  |
| C    | 1.780365  | -0.550121 | 2.914398  |
| H    | 0.979150  | -0.968078 | 2.295136  |
| H    | 2.219898  | -1.393824 | 3.462303  |
| H    | 1.327572  | 0.132167  | 3.640124  |
| C    | -2.294407 | -0.955484 | -0.862600 |
| O    | -1.699984 | 0.174500  | -0.671499 |
| C    | -3.796459 | -0.854067 | -1.184707 |
| O    | -4.169370 | -1.250689 | -2.275806 |
| C    | -4.728771 | -0.296443 | -0.165930 |
| C    | -4.290422 | 0.187702  | 1.075811  |
| C    | -6.100745 | -0.289073 | -0.466399 |
| C    | -5.213566 | 0.671129  | 2.002209  |
| H    | -3.230959 | 0.203314  | 1.307903  |
| C    | -7.018649 | 0.195103  | 0.459021  |
| H    | -6.418723 | -0.671290 | -1.431079 |
| C    | -6.575780 | 0.675202  | 1.696155  |

|   |           |           |           |
|---|-----------|-----------|-----------|
| H | -4.869852 | 1.047103  | 2.961902  |
| H | -8.079045 | 0.198282  | 0.221972  |
| H | -7.293248 | 1.052374  | 2.420261  |
| O | -1.761292 | -2.075994 | -0.855816 |
| H | -0.232601 | -2.151308 | -0.499898 |

#### C-TS4

| Atom | X         | Y         | Z         |
|------|-----------|-----------|-----------|
| C    | -2.492240 | -1.585651 | 0.072556  |
| C    | -1.552056 | -0.621162 | 0.465953  |
| C    | -1.515292 | 0.592905  | -0.257043 |
| C    | -2.424012 | 0.828450  | -1.298946 |
| C    | -3.343367 | -0.148084 | -1.673506 |
| C    | -3.368473 | -1.363621 | -0.989502 |
| H    | -2.542318 | -2.514560 | 0.632747  |
| H    | -2.388982 | 1.781676  | -1.817155 |
| H    | -4.036287 | 0.041930  | -2.488029 |
| H    | -4.082948 | -2.133569 | -1.268141 |
| C    | -0.529446 | 1.661142  | 0.018095  |
| O    | -0.888968 | 2.890467  | 0.218049  |
| N    | 0.790434  | 1.634024  | 0.104837  |
| H    | 0.419208  | 2.917597  | 0.295472  |
| C    | 1.755635  | 0.683840  | -0.260296 |
| C    | 3.000184  | 0.734843  | 0.386446  |
| C    | 1.554030  | -0.260568 | -1.281334 |
| C    | 4.014364  | -0.152773 | 0.035045  |
| H    | 3.153545  | 1.476302  | 1.165026  |
| C    | 2.571856  | -1.150336 | -1.619516 |
| H    | 0.607762  | -0.287428 | -1.811487 |
| C    | 3.805215  | -1.104243 | -0.965749 |
| H    | 4.971930  | -0.101005 | 0.546676  |
| H    | 2.402298  | -1.876338 | -2.410710 |
| H    | 4.596859  | -1.796024 | -1.239494 |
| C    | -0.696227 | -0.888012 | 1.662562  |
| C    | 0.084492  | -1.974360 | 1.708768  |
| H    | 0.174697  | -2.651845 | 0.864780  |
| H    | 0.681571  | -2.204186 | 2.587362  |
| C    | -0.826684 | 0.059109  | 2.835521  |
| H    | -0.593312 | 1.093789  | 2.563102  |
| H    | -1.855818 | 0.058645  | 3.217987  |
| H    | -0.157366 | -0.235766 | 3.649293  |

#### HOAc

| Atom | X         | Y        | Z         |
|------|-----------|----------|-----------|
| C    | -0.092247 | 0.125912 | 0.000314  |
| O    | -0.645376 | 1.202172 | -0.000084 |

|   |           |           |           |
|---|-----------|-----------|-----------|
| O | -0.778837 | -1.046773 | -0.000050 |
| H | -1.723458 | -0.802526 | -0.000131 |
| C | 1.397256  | -0.110034 | -0.000071 |
| H | 1.685315  | -0.690820 | 0.882235  |
| H | 1.684698  | -0.692973 | -0.881142 |
| H | 1.917095  | 0.847863  | -0.001347 |

### PGA

| Atom | X         | Y         | Z         |
|------|-----------|-----------|-----------|
| C    | -2.119453 | -0.384948 | -0.064965 |
| O    | -2.084659 | -1.438981 | -0.662526 |
| C    | -0.999834 | 0.676546  | -0.081673 |
| O    | -1.332908 | 1.845693  | -0.168920 |
| C    | 0.417884  | 0.235545  | -0.032621 |
| C    | 0.809000  | -1.107879 | 0.098088  |
| C    | 1.401111  | 1.240028  | -0.088408 |
| C    | 2.162539  | -1.433826 | 0.170082  |
| H    | 0.061337  | -1.890886 | 0.127061  |
| C    | 2.748713  | 0.908474  | -0.018997 |
| H    | 1.080088  | 2.271980  | -0.184773 |
| C    | 3.131697  | -0.430865 | 0.111267  |
| H    | 2.460366  | -2.473806 | 0.268872  |
| H    | 3.502821  | 1.689183  | -0.064087 |
| H    | 4.185494  | -0.690824 | 0.166793  |
| O    | -3.175406 | 0.035318  | 0.651402  |
| H    | -3.856259 | -0.660334 | 0.569851  |

### Qox

| Atom | X         | Y         | Z         |
|------|-----------|-----------|-----------|
| C    | -0.227921 | -0.655248 | -0.674466 |
| O    | -0.884779 | -1.814006 | -0.334644 |
| N    | -0.873218 | 0.253416  | -1.293595 |
| C    | 1.777571  | -1.735008 | 0.386532  |
| C    | 3.098436  | -1.674651 | 0.758328  |
| C    | 3.850494  | -0.504551 | 0.489055  |
| C    | 3.170753  | 0.570798  | -0.171488 |
| C    | 1.198073  | -0.609209 | -0.264293 |
| H    | 5.729093  | -1.169981 | 1.337660  |
| H    | 1.172877  | -2.613282 | 0.576455  |
| H    | 3.575003  | -2.515197 | 1.257634  |
| C    | 5.217929  | -0.351200 | 0.836459  |
| C    | 3.887157  | 1.764603  | -0.461002 |
| C    | 5.212387  | 1.882575  | -0.111017 |
| C    | 5.883774  | 0.817377  | 0.542603  |
| H    | 3.349674  | 2.563839  | -0.961301 |
| H    | 5.754498  | 2.797351  | -0.334597 |

|   |           |           |           |
|---|-----------|-----------|-----------|
| H | 6.930627  | 0.929019  | 0.811436  |
| N | 1.863013  | 0.500738  | -0.534658 |
| C | -2.227720 | -1.699910 | -0.868208 |
| H | -2.333267 | -2.472961 | -1.634477 |
| C | -2.255690 | -0.237101 | -1.417902 |
| H | -2.567699 | -0.169469 | -2.466823 |
| C | -3.294515 | -1.808641 | 0.240802  |
| H | -4.113859 | -2.466386 | -0.078531 |
| H | -2.864448 | -2.253578 | 1.145436  |
| C | -3.774400 | -0.386206 | 0.445896  |
| C | -3.214485 | 0.487080  | -0.492120 |
| C | -4.670212 | 0.093474  | 1.402362  |
| C | -3.531222 | 1.844657  | -0.484407 |
| C | -4.993892 | 1.452147  | 1.410419  |
| H | -5.110670 | -0.578287 | 2.135680  |
| C | -4.427289 | 2.323646  | 0.473126  |
| H | -3.074678 | 2.518604  | -1.204055 |
| H | -5.689371 | 1.835919  | 2.152359  |
| H | -4.683471 | 3.379586  | 0.493983  |

### R-2a

| Atom | X         | Y         | Z         |
|------|-----------|-----------|-----------|
| C    | -2.781116 | -1.415110 | -0.213460 |
| C    | -1.694804 | -0.584613 | 0.046669  |
| C    | -1.842854 | 0.804924  | -0.014939 |
| C    | -3.055568 | 1.400714  | -0.350903 |
| C    | -4.141950 | 0.568105  | -0.623266 |
| C    | -4.002905 | -0.824987 | -0.556231 |
| H    | -2.690747 | -2.497281 | -0.162998 |
| H    | -3.135587 | 2.482717  | -0.399301 |
| H    | -5.102926 | 0.998943  | -0.890143 |
| H    | -4.858390 | -1.458293 | -0.775681 |
| C    | -0.534171 | 1.464741  | 0.250806  |
| O    | -0.246282 | 2.647186  | 0.177267  |
| C    | 1.701021  | 0.341739  | 0.197362  |
| C    | 1.953295  | -0.906298 | -0.395006 |
| C    | 2.691876  | 1.306721  | 0.343981  |
| C    | 3.237424  | -1.215599 | -0.824335 |
| C    | 3.977623  | 0.984939  | -0.105773 |
| H    | 2.461492  | 2.271010  | 0.781409  |
| C    | 4.253670  | -0.261939 | -0.672712 |
| H    | 3.451649  | -2.177095 | -1.284801 |
| H    | 4.773884  | 1.717303  | -0.004146 |
| H    | 5.262170  | -0.493436 | -1.003740 |
| C    | -0.283014 | -0.925150 | 0.479967  |
| C    | 0.654064  | -1.686565 | -0.509600 |

|   |           |           |           |
|---|-----------|-----------|-----------|
| H | 0.266871  | -1.643462 | -1.535970 |
| H | 0.751745  | -2.742910 | -0.238235 |
| C | -0.268633 | -1.600773 | 1.863718  |
| H | -0.793015 | -0.983883 | 2.599203  |
| H | -0.760172 | -2.579046 | 1.813667  |
| H | 0.762416  | -1.749123 | 2.202387  |
| N | 0.342447  | 0.424568  | 0.568934  |

**S-2a**

| Atom | X         | Y         | Z         |
|------|-----------|-----------|-----------|
| C    | 2.781062  | -1.415111 | -0.213661 |
| C    | 1.694789  | -0.584620 | 0.046613  |
| C    | 1.842844  | 0.804923  | -0.014893 |
| C    | 3.055556  | 1.400722  | -0.350861 |
| C    | 4.141909  | 0.568118  | -0.623361 |
| C    | 4.002843  | -0.824975 | -0.556452 |
| H    | 2.690673  | -2.497284 | -0.163282 |
| H    | 3.135591  | 2.482727  | -0.399169 |
| H    | 5.102873  | 0.998967  | -0.890263 |
| H    | 4.858302  | -1.458273 | -0.776028 |
| C    | 0.534159  | 1.464737  | 0.250802  |
| O    | 0.246282  | 2.647188  | 0.177437  |
| N    | -0.342456 | 0.424529  | 0.568919  |
| C    | -1.701015 | 0.341692  | 0.197428  |
| C    | -1.953356 | -0.906408 | -0.394773 |
| C    | -2.691822 | 1.306789  | 0.343797  |
| C    | -3.237452 | -1.215625 | -0.824275 |
| C    | -3.977554 | 0.985027  | -0.105974 |
| H    | -2.461386 | 2.271127  | 0.781088  |
| C    | -4.253651 | -0.261895 | -0.672802 |
| H    | -3.451674 | -2.177106 | -1.284775 |
| H    | -4.773769 | 1.717462  | -0.004484 |
| H    | -5.262134 | -0.493366 | -1.003897 |
| C    | 0.283013  | -0.925155 | 0.479996  |
| C    | -0.654160 | -1.686743 | -0.509344 |
| H    | -0.267094 | -1.644019 | -1.535770 |
| H    | -0.751877 | -2.743001 | -0.237624 |
| C    | 0.268826  | -1.600635 | 1.863856  |
| H    | 0.793228  | -0.983596 | 2.599200  |
| H    | 0.760435  | -2.578875 | 1.813872  |
| H    | -0.762184 | -1.749016 | 2.202634  |

**TS1'**

| Atom | X         | Y         | Z         |
|------|-----------|-----------|-----------|
| Pd   | -0.267554 | -0.708250 | 0.912686  |
| C    | 0.678538  | -0.350872 | -2.127199 |

|   |           |           |           |
|---|-----------|-----------|-----------|
| O | 1.771012  | 0.338891  | -2.094014 |
| O | 0.107608  | -0.912220 | -1.162728 |
| C | 0.039623  | -0.470732 | -3.491903 |
| H | 0.792252  | -0.433885 | -4.282414 |
| H | -0.549335 | -1.387957 | -3.552643 |
| H | -0.643038 | 0.378438  | -3.618955 |
| C | -1.091510 | -1.598578 | 3.491548  |
| O | -1.439762 | -2.653005 | 2.960314  |
| O | -0.670977 | -0.525075 | 2.865765  |
| C | -1.097169 | -1.420841 | 5.005768  |
| H | -0.072841 | -1.534303 | 5.379296  |
| H | -1.442554 | -0.421391 | 5.285309  |
| H | -1.726812 | -2.185139 | 5.466299  |
| C | -2.919014 | 0.705558  | 0.270327  |
| O | -4.260434 | 0.600997  | 0.334455  |
| N | -2.250470 | -0.374142 | 0.483406  |
| C | -3.152635 | 3.181849  | 0.454735  |
| C | -2.740580 | 4.444129  | 0.103860  |
| C | -1.633538 | 4.603248  | -0.765306 |
| C | -0.976157 | 3.414055  | -1.224197 |
| C | -2.429261 | 2.068745  | -0.053663 |
| H | -1.668053 | 6.766884  | -0.854057 |
| H | -4.008371 | 3.020423  | 1.099672  |
| H | -3.261449 | 5.322893  | 0.475990  |
| C | -1.167249 | 5.868766  | -1.207177 |
| C | 0.126172  | 3.533226  | -2.114189 |
| C | 0.546254  | 4.775645  | -2.531902 |
| C | -0.102395 | 5.951797  | -2.075825 |
| H | 0.626832  | 2.625972  | -2.434600 |
| H | 1.387716  | 4.860993  | -3.213792 |
| H | 0.247196  | 6.922653  | -2.415874 |
| N | -1.382321 | 2.167669  | -0.853004 |
| C | -4.586162 | -0.765404 | 0.746611  |
| H | -4.985261 | -0.694056 | 1.761352  |
| C | -3.221561 | -1.495114 | 0.634997  |
| H | -2.932953 | -2.075498 | 1.514112  |
| C | -5.554895 | -1.415112 | -0.254794 |
| H | -6.297595 | -2.019727 | 0.282239  |
| H | -6.108403 | -0.650840 | -0.811969 |
| C | -4.663784 | -2.279473 | -1.122275 |
| C | -3.361664 | -2.346116 | -0.613666 |
| C | -5.009817 | -2.996385 | -2.268350 |
| C | -2.392028 | -3.138724 | -1.228861 |
| C | -4.039285 | -3.781986 | -2.894226 |
| H | -6.019610 | -2.948773 | -2.668966 |
| C | -2.740568 | -3.855564 | -2.375926 |

|             |           |           |           |    |           |           |           |
|-------------|-----------|-----------|-----------|----|-----------|-----------|-----------|
| H           | -1.384559 | -3.185587 | -0.829170 | H  | 1.292359  | -1.110180 | -1.970726 |
| H           | -4.296233 | -4.344990 | -3.787648 | H  | 2.969900  | -0.444146 | -3.648713 |
| H           | -1.998103 | -4.478286 | -2.867771 | H  | 5.398752  | -0.594591 | -3.098730 |
| C           | 5.177323  | -2.922592 | -1.346692 | C  | 1.733807  | -2.204560 | 0.505224  |
| C           | 4.580152  | -1.827682 | -0.700227 | O  | 1.818914  | -3.347534 | 0.908392  |
| C           | 3.334787  | -2.038360 | -0.050807 | C  | -0.243591 | -1.733749 | 1.971358  |
| C           | 2.768291  | -3.326249 | -0.042140 | C  | -0.797783 | -0.724858 | 2.788421  |
| C           | 3.385219  | -4.396123 | -0.681903 | C  | -0.677509 | -3.060547 | 2.146583  |
| C           | 4.592976  | -4.188646 | -1.348659 | C  | -1.774645 | -1.030660 | 3.733101  |
| H           | 6.134167  | -2.768417 | -1.836506 | H  | -0.434880 | 0.293112  | 2.711351  |
| H           | 1.824383  | -3.461687 | 0.473790  | C  | -1.649326 | -3.352834 | 3.102893  |
| H           | 2.925437  | -5.380426 | -0.663129 | H  | -0.240429 | -3.858763 | 1.569684  |
| H           | 5.089078  | -5.010923 | -1.858145 | C  | -2.209223 | -2.347054 | 3.894019  |
| C           | 2.540100  | -0.957647 | 0.605087  | H  | -2.178831 | -0.237691 | 4.355270  |
| O           | 1.634914  | -1.332749 | 1.445268  | H  | -1.961834 | -4.384775 | 3.235806  |
| N           | 2.758075  | 0.294717  | 0.216177  | H  | -2.960554 | -2.590243 | 4.639514  |
| H           | 2.310437  | 0.353429  | -1.096565 | C  | 4.619228  | -2.300742 | 1.156812  |
| C           | 2.373832  | 1.434986  | 0.952584  | C  | 4.521456  | -1.584450 | 2.281945  |
| C           | 2.531328  | 2.671343  | 0.294545  | H  | 4.056558  | -0.603864 | 2.310333  |
| C           | 1.970724  | 1.446201  | 2.304397  | H  | 4.901709  | -1.972042 | 3.223670  |
| C           | 2.279177  | 3.873270  | 0.949892  | C  | 5.252436  | -3.671465 | 1.107212  |
| H           | 2.878712  | 2.670531  | -0.734228 | H  | 4.512318  | -4.418664 | 0.795823  |
| C           | 1.734239  | 2.657241  | 2.955117  | H  | 6.074392  | -3.710078 | 0.380592  |
| H           | 1.833831  | 0.515477  | 2.837757  | H  | 5.645918  | -3.959085 | 2.086505  |
| C           | 1.877902  | 3.875588  | 2.288143  | Pd | -0.501956 | -0.108246 | -0.314469 |
| H           | 2.404672  | 4.810766  | 0.414200  | N  | 0.707255  | -1.295375 | 0.966385  |
| H           | 1.426673  | 2.641060  | 3.997815  | H  | 1.341957  | -0.310961 | 1.447170  |
| H           | 1.686254  | 4.812471  | 2.804572  | C  | -3.061734 | 0.619272  | -1.323860 |
| C           | 5.354111  | -0.544799 | -0.696122 | O  | -4.063446 | 1.389849  | -1.723128 |
| C           | 5.672051  | 0.057872  | -1.848908 | N  | -1.936069 | 1.186362  | -1.045019 |
| H           | 5.302618  | -0.302620 | -2.804994 | C  | -4.444116 | -1.449042 | -1.572396 |
| H           | 6.291861  | 0.950982  | -1.866377 | C  | -4.498458 | -2.824525 | -1.598503 |
| C           | 5.888671  | -0.064231 | 0.634351  | C  | -3.315801 | -3.571769 | -1.412831 |
| H           | 5.082059  | 0.130807  | 1.346887  | C  | -2.089669 | -2.867057 | -1.137272 |
| H           | 6.543848  | -0.823919 | 1.081532  | C  | -3.215648 | -0.835145 | -1.273100 |
| H           | 6.465563  | 0.857983  | 0.512631  | H  | -4.223824 | -5.506700 | -1.734470 |
| <b>TS2'</b> |           |           |           | H  | -5.310452 | -0.830166 | -1.773380 |
| Atom        | X         | Y         | Z         | H  | -5.433291 | -3.339906 | -1.799471 |
| C           | 5.050786  | -1.370084 | -1.121428 | C  | -3.290570 | -4.986114 | -1.539937 |
| C           | 4.118633  | -1.766614 | -0.151313 | C  | -0.885010 | -3.605340 | -1.075549 |
| C           | 2.743259  | -1.649709 | -0.461103 | C  | -0.892061 | -4.972539 | -1.235219 |
| C           | 2.348258  | -1.167792 | -1.718835 | C  | -2.104089 | -5.675071 | -1.449799 |
| C           | 3.293345  | -0.794182 | -2.672623 | H  | 0.044678  | -3.080984 | -0.923425 |
| C           | 4.651345  | -0.888589 | -2.367294 | H  | 0.046493  | -5.516541 | -1.192769 |
| H           | 6.108980  | -1.440038 | -0.885649 | H  | -2.088347 | -6.754718 | -1.560137 |
|             |           |           |           | N  | -2.083912 | -1.502645 | -0.992870 |

|             |           |           |           |   |           |           |           |
|-------------|-----------|-----------|-----------|---|-----------|-----------|-----------|
| C           | -3.520213 | 2.760792  | -1.849615 | H | -0.212832 | -6.524469 | -0.665034 |
| H           | -3.471468 | 2.957907  | -2.922166 | C | 2.237637  | -5.505925 | -1.219692 |
| C           | -2.132753 | 2.659118  | -1.135404 | C | 2.275990  | -2.691182 | -1.313191 |
| H           | -1.307579 | 3.087703  | -1.710314 | C | 3.398029  | -3.425166 | -1.625481 |
| C           | -4.387436 | 3.746669  | -1.061594 | C | 3.391498  | -4.840599 | -1.558940 |
| H           | -4.460142 | 4.694692  | -1.609891 | H | 2.275378  | -1.613514 | -1.382504 |
| H           | -5.408390 | 3.365354  | -0.951431 | H | 4.302434  | -2.910723 | -1.936274 |
| C           | -3.646250 | 3.920063  | 0.245748  | H | 4.293157  | -5.395506 | -1.798067 |
| C           | -2.367963 | 3.348247  | 0.199118  | N | -0.053333 | -2.626637 | -0.640303 |
| C           | -4.072005 | 4.601850  | 1.385470  | C | -4.547340 | -1.792426 | -0.579246 |
| C           | -1.492027 | 3.475951  | 1.277625  | H | -4.941581 | -1.861644 | -1.594141 |
| C           | -3.203891 | 4.711021  | 2.474438  | C | -3.628827 | -0.555834 | -0.320187 |
| H           | -5.061764 | 5.048840  | 1.425498  | H | -3.723663 | 0.223407  | -1.081033 |
| C           | -1.919727 | 4.157859  | 2.418578  | C | -5.611993 | -1.826195 | 0.522195  |
| H           | -0.487445 | 3.074150  | 1.247658  | H | -6.576944 | -1.502628 | 0.111539  |
| H           | -3.524955 | 5.240190  | 3.366949  | H | -5.753759 | -2.844855 | 0.899225  |
| H           | -1.241422 | 4.262316  | 3.259913  | C | -5.097366 | -0.852065 | 1.560332  |
| C           | 3.741039  | 3.598473  | 0.196163  | C | -4.004197 | -0.116875 | 1.085035  |
| C           | 4.666937  | 4.390653  | -0.475312 | C | -5.605588 | -0.611757 | 2.836904  |
| C           | 4.655083  | 4.455849  | -1.871253 | C | -3.410771 | 0.871845  | 1.871976  |
| C           | 3.714597  | 3.723254  | -2.606672 | C | -5.008246 | 0.370030  | 3.630516  |
| C           | 2.788763  | 2.926977  | -1.946981 | H | -6.455227 | -1.176969 | 3.210597  |
| C           | 2.789594  | 2.856933  | -0.536599 | C | -3.920040 | 1.108129  | 3.150948  |
| H           | 3.730166  | 3.569213  | 1.278548  | H | -2.568196 | 1.445318  | 1.498709  |
| H           | 5.395274  | 4.962802  | 0.090780  | H | -5.395007 | 0.565223  | 4.626533  |
| H           | 5.379747  | 5.077552  | -2.389479 | H | -3.471048 | 1.873760  | 3.777286  |
| H           | 3.712843  | 3.774651  | -3.691334 | C | 5.350173  | 2.546047  | 0.941259  |
| H           | 2.065598  | 2.342928  | -2.504818 | C | 3.993488  | 2.235506  | 0.742270  |
| C           | 1.824909  | 1.986070  | 0.133431  | C | 3.661671  | 1.439101  | -0.376485 |
| O           | 0.929639  | 1.420136  | -0.543476 | C | 4.658183  | 1.051136  | -1.287599 |
| C           | 1.838865  | 1.813215  | 1.658112  | C | 5.992933  | 1.380782  | -1.072474 |
| O           | 1.781723  | 2.844471  | 2.316658  | C | 6.339328  | 2.124483  | 0.056584  |
| O           | 1.862162  | 0.601452  | 2.093728  | H | 5.630643  | 3.160772  | 1.790396  |
| <b>TS3'</b> |           |           |           | H | 4.374291  | 0.483726  | -2.169061 |
| Atom        | X         | Y         | Z         | H | 6.752424  | 1.065754  | -1.781749 |
| Pd          | -0.323246 | -0.508627 | -0.341518 | H | 7.375618  | 2.394265  | 0.238443  |
| C           | -2.393969 | -2.432129 | -0.428929 | C | 2.281768  | 0.942487  | -0.708375 |
| N           | -2.270796 | -1.148587 | -0.419849 | O | 1.869039  | 1.309611  | -1.871757 |
| C           | -1.322716 | -4.694462 | -0.510317 | N | 1.600574  | 0.109798  | 0.065023  |
| C           | -0.177067 | -5.438935 | -0.679339 | C | 2.063224  | -0.369776 | 1.331862  |
| C           | 1.049250  | -4.785603 | -0.927275 | C | 3.281450  | -1.051193 | 1.473141  |
| C           | 1.078300  | -3.345235 | -0.935138 | C | 1.227474  | -0.220181 | 2.450878  |
| C           | -1.213178 | -3.294272 | -0.505115 | C | 3.656725  | -1.562187 | 2.715806  |
| H           | 2.206194  | -6.591358 | -1.196070 | H | 3.936896  | -1.170701 | 0.618822  |
| H           | -2.298220 | -5.149022 | -0.384481 | C | 1.603134  | -0.745633 | 3.686920  |
|             |           |           |           | H | 0.291815  | 0.320858  | 2.348104  |

|             |           |           |           |   |           |           |           |
|-------------|-----------|-----------|-----------|---|-----------|-----------|-----------|
| C           | 2.819911  | -1.417909 | 3.825051  | C | -2.689729 | 4.546069  | -0.634107 |
| H           | 4.606262  | -2.080674 | 2.813355  | C | -1.633207 | 3.679849  | -0.195480 |
| H           | 0.947547  | -0.620293 | 4.543894  | C | -3.098640 | 1.938916  | 0.154334  |
| H           | 3.114451  | -1.824027 | 4.788152  | H | -3.180766 | 6.528839  | -1.355405 |
| C           | 2.973384  | 2.810355  | 1.664952  | H | -5.209344 | 2.279769  | -0.249675 |
| C           | 1.883812  | 3.422518  | 1.178176  | H | -4.830897 | 4.640157  | -0.972613 |
| H           | 1.710282  | 3.534767  | 0.112164  | C | -2.378240 | 5.874680  | -1.023141 |
| H           | 1.150285  | 3.869991  | 1.843845  | C | -0.300474 | 4.172671  | -0.156225 |
| C           | 3.252043  | 2.746912  | 3.149934  | C | -0.033816 | 5.466689  | -0.541065 |
| H           | 4.137470  | 3.336294  | 3.418666  | C | -1.077040 | 6.323501  | -0.977515 |
| H           | 3.439970  | 1.718411  | 3.477443  | H | 0.482842  | 3.504456  | 0.183414  |
| H           | 2.408608  | 3.145202  | 3.721316  | H | 0.987042  | 5.836237  | -0.510369 |
| C           | -1.288031 | 1.212565  | -2.601982 | H | -0.843801 | 7.341726  | -1.276649 |
| O           | -0.183186 | 0.702580  | -3.004053 | N | -1.860944 | 2.396243  | 0.188547  |
| O           | -2.423401 | 1.041326  | -3.041834 | C | -4.631587 | -1.215383 | 1.158402  |
| H           | 0.870819  | 0.979426  | -2.340973 | H | -5.121742 | -1.270318 | 2.131845  |
| C           | -1.220295 | 2.074207  | -1.331466 | C | -3.130891 | -1.631179 | 1.179378  |
| O           | -0.881649 | 1.506900  | -0.254551 | H | -2.738596 | -1.913902 | 2.157469  |
| O           | -3.617902 | -2.939977 | -0.437747 | C | -5.345371 | -2.058110 | 0.076286  |
| C           | -1.610717 | 3.477529  | -1.339356 | H | -6.187053 | -2.615848 | 0.505135  |
| C           | -1.517532 | 4.241227  | -0.156213 | H | -5.763165 | -1.399690 | -0.695262 |
| C           | -2.052890 | 4.087213  | -2.532403 | C | -4.267532 | -2.982534 | -0.451459 |
| C           | -1.857523 | 5.587072  | -0.169429 | C | -3.039670 | -2.766659 | 0.184022  |
| H           | -1.168425 | 3.766823  | 0.754128  | C | -4.391421 | -3.987157 | -1.411892 |
| C           | -2.389725 | 5.436774  | -2.535531 | C | -1.927936 | -3.560417 | -0.099150 |
| H           | -2.152664 | 3.497662  | -3.436538 | C | -3.274276 | -4.768876 | -1.720669 |
| C           | -2.292240 | 6.185586  | -1.359107 | H | -5.342133 | -4.167961 | -1.908281 |
| H           | -1.783251 | 6.175857  | 0.739733  | C | -2.054493 | -4.561639 | -1.065457 |
| H           | -2.731954 | 5.904965  | -3.453023 | H | -0.996402 | -3.399748 | 0.434592  |
| H           | -2.555677 | 7.239418  | -1.366942 | H | -3.358361 | -5.554480 | -2.467295 |
| <b>TS1a</b> |           |           |           | H | -1.198109 | -5.184373 | -1.307249 |
| Atom        | X         | Y         | Z         | C | 6.206719  | -1.372772 | -0.255982 |
| Pd          | -0.366381 | -0.260857 | 0.437616  | C | 4.883923  | -1.247565 | -0.718083 |
| C           | -0.171991 | -1.278490 | 3.145381  | C | 3.848508  | -1.306912 | 0.241985  |
| O           | -0.567875 | -2.366591 | 2.724484  | C | 4.155499  | -1.497602 | 1.596492  |
| O           | -0.017115 | -0.189781 | 2.438459  | C | 5.472774  | -1.641085 | 2.024901  |
| C           | 0.196508  | -1.078001 | 4.614358  | C | 6.504241  | -1.578842 | 1.088796  |
| H           | 1.268497  | -0.867777 | 4.704191  | H | 7.021206  | -1.325943 | -0.972560 |
| H           | -0.338203 | -0.216991 | 5.028842  | H | 3.342448  | -1.535968 | 2.316001  |
| H           | -0.042868 | -1.977062 | 5.185521  | H | 5.688861  | -1.795134 | 3.078434  |
| C           | -3.312341 | 0.534385  | 0.576412  | H | 7.539201  | -1.687404 | 1.402251  |
| O           | -4.599023 | 0.195980  | 0.799369  | C | 2.374172  | -1.238790 | -0.076626 |
| N           | -2.430526 | -0.386899 | 0.753849  | O | 1.828569  | -2.324725 | -0.476708 |
| C           | -4.218025 | 2.715892  | -0.254221 | N | 1.673271  | -0.145066 | 0.171850  |
| C           | -4.002675 | 4.014189  | -0.649252 | C | 2.300272  | 1.121077  | 0.375012  |
|             |           |           |           | C | 2.289735  | 1.741072  | 1.633534  |



|             |           |           |           |   |           |           |           |
|-------------|-----------|-----------|-----------|---|-----------|-----------|-----------|
| C           | 2.888386  | 1.783113  | -0.713248 | H | -4.863050 | 4.772816  | 0.400405  |
| C           | 2.888060  | 2.990871  | 1.798718  | C | -2.505913 | 5.997638  | -0.286737 |
| H           | 1.796699  | 1.238595  | 2.457418  | C | -0.355227 | 4.174114  | -0.464187 |
| C           | 3.488996  | 3.031023  | -0.538701 | C | -0.162063 | 5.516641  | -0.698773 |
| H           | 2.868154  | 1.308715  | -1.689310 | C | -1.241165 | 6.433750  | -0.612811 |
| C           | 3.495389  | 3.638862  | 0.719057  | H | 0.457949  | 3.458198  | -0.522078 |
| H           | 2.880611  | 3.459873  | 2.779383  | H | 0.828903  | 5.882051  | -0.953021 |
| H           | 3.947380  | 3.529387  | -1.389272 | H | -1.063768 | 7.488604  | -0.804012 |
| H           | 3.966880  | 4.608422  | 0.856865  | N | -1.813042 | 2.362974  | 0.096130  |
| C           | 4.652744  | -1.010668 | -2.176862 | C | -4.292773 | -1.337261 | 1.466204  |
| C           | 3.750701  | -1.702717 | -2.888236 | H | -4.458245 | -1.410642 | 2.543150  |
| H           | 3.138190  | -2.478903 | -2.446704 | C | -2.860745 | -1.745375 | 1.014418  |
| H           | 3.614077  | -1.506764 | -3.949385 | H | -2.236088 | -2.157972 | 1.810183  |
| C           | 5.521853  | 0.041724  | -2.835659 | C | -5.308409 | -2.149116 | 0.638626  |
| H           | 6.580800  | -0.246285 | -2.841353 | H | -5.882118 | -2.822178 | 1.288380  |
| H           | 5.458745  | 0.997414  | -2.300934 | H | -6.031645 | -1.479246 | 0.158649  |
| H           | 5.219296  | 0.201264  | -3.875369 | C | -4.457668 | -2.922250 | -0.347121 |
| C           | -0.534255 | -1.108609 | -2.440269 | C | -3.090949 | -2.716529 | -0.127074 |
| O           | -0.788285 | -0.202558 | -1.601494 | C | -4.887306 | -3.796811 | -1.346308 |
| O           | 0.228090  | -2.119567 | -2.261321 | C | -2.135909 | -3.397777 | -0.882702 |
| C           | -1.213780 | -1.031076 | -3.788669 | C | -3.933808 | -4.466965 | -2.115998 |
| H           | -1.624032 | -0.034418 | -3.958498 | H | -5.948013 | -3.962027 | -1.520418 |
| H           | -0.511093 | -1.299557 | -4.581657 | C | -2.567215 | -4.272838 | -1.881755 |
| H           | -2.029939 | -1.763063 | -3.804833 | H | -1.076849 | -3.242300 | -0.703981 |
| H           | 0.875095  | -2.162874 | -1.311666 | H | -4.255897 | -5.151985 | -2.896048 |
|             |           |           |           | H | -1.834952 | -4.809100 | -2.479199 |
|             |           |           |           | C | 6.183272  | 0.698375  | 0.171103  |
|             |           |           |           | C | 4.803366  | 0.560572  | 0.400722  |
|             |           |           |           | C | 3.927982  | 0.792166  | -0.683960 |
|             |           |           |           | C | 4.444868  | 1.204238  | -1.922920 |
|             |           |           |           | C | 5.815983  | 1.326076  | -2.129053 |
|             |           |           |           | C | 6.691043  | 1.058244  | -1.075678 |
|             |           |           |           | H | 6.859115  | 0.540775  | 1.006349  |
|             |           |           |           | H | 3.749562  | 1.413849  | -2.730124 |
|             |           |           |           | H | 6.195704  | 1.632016  | -3.099992 |
|             |           |           |           | H | 7.764852  | 1.151699  | -1.215383 |
|             |           |           |           | C | 2.433858  | 0.641181  | -0.628145 |
|             |           |           |           | O | 1.768770  | 1.665691  | -1.042640 |
|             |           |           |           | N | 1.811076  | -0.458320 | -0.236589 |
|             |           |           |           | C | 2.421257  | -1.744280 | -0.170384 |
|             |           |           |           | C | 3.282062  | -2.193642 | -1.186251 |
|             |           |           |           | C | 2.081955  | -2.624367 | 0.870399  |
|             |           |           |           | C | 3.829093  | -3.475447 | -1.133603 |
|             |           |           |           | H | 3.519737  | -1.540829 | -2.018911 |
|             |           |           |           | C | 2.625797  | -3.907703 | 0.907713  |
|             |           |           |           | H | 1.379679  | -2.313105 | 1.636060  |
| <b>TS1b</b> |           |           |           |   |           |           |           |
| Atom        | X         | Y         | Z         |   |           |           |           |
| Pd          | -0.215595 | -0.350124 | 0.161475  |   |           |           |           |
| C           | -0.049586 | -0.587147 | 3.070810  |   |           |           |           |
| O           | -0.468566 | -1.747005 | 2.996081  |   |           |           |           |
| O           | 0.203707  | 0.204596  | 2.066842  |   |           |           |           |
| C           | 0.264484  | 0.046076  | 4.424137  |   |           |           |           |
| H           | 1.336321  | -0.059111 | 4.628627  |   |           |           |           |
| H           | 0.028119  | 1.113491  | 4.426636  |   |           |           |           |
| H           | -0.288783 | -0.470296 | 5.211947  |   |           |           |           |
| C           | -3.143270 | 0.471801  | 0.713363  |   |           |           |           |
| O           | -4.362017 | 0.082797  | 1.140554  |   |           |           |           |
| N           | -2.246555 | -0.447414 | 0.618379  |   |           |           |           |
| C           | -4.155471 | 2.756171  | 0.561030  |   |           |           |           |
| C           | -4.012084 | 4.100854  | 0.318291  |   |           |           |           |
| C           | -2.743042 | 4.621710  | -0.034476 |   |           |           |           |
| C           | -1.651869 | 3.693800  | -0.130308 |   |           |           |           |
| C           | -3.010562 | 1.921205  | 0.434346  |   |           |           |           |
| H           | -3.334994 | 6.697579  | -0.215257 |   |           |           |           |
| H           | -5.109120 | 2.327775  | 0.843119  |   |           |           |           |

|   |           |           |           |    |           |           |           |
|---|-----------|-----------|-----------|----|-----------|-----------|-----------|
| C | 3.508279  | -4.339448 | -0.085250 | C  | -0.542927 | -1.458582 | -1.918209 |
| H | 4.496942  | -3.801393 | -1.927021 | C  | -0.178433 | -0.102090 | -1.725664 |
| H | 2.353011  | -4.572754 | 1.722978  | H  | -0.968062 | 0.637863  | -1.849825 |
| H | 3.928695  | -5.340918 | -0.050689 | H  | 0.813324  | 0.206607  | -2.052775 |
| C | 4.352996  | 0.273117  | 1.796359  | C  | 0.385476  | -2.411029 | -2.619680 |
| C | 4.819722  | -0.798550 | 2.450918  | H  | 0.143399  | -3.456204 | -2.416414 |
| H | 5.456690  | -1.533501 | 1.967161  | H  | 0.284882  | -2.241379 | -3.702031 |
| H | 4.551095  | -0.988528 | 3.487111  | H  | 1.427294  | -2.223785 | -2.344218 |
| C | 3.446687  | 1.289369  | 2.455649  | Pd | -0.173947 | -0.258116 | 0.410003  |
| H | 2.432712  | 1.266441  | 2.042500  | C  | -1.285355 | -0.575479 | 3.057409  |
| H | 3.839354  | 2.305671  | 2.323428  | O  | -2.353768 | -0.235861 | 2.528437  |
| H | 3.366875  | 1.089655  | 3.529277  | O  | -0.121626 | -0.558693 | 2.477940  |
| H | 0.816330  | 1.364271  | -1.785049 | C  | -1.250244 | -1.088539 | 4.493499  |
| C | -0.528657 | 0.057907  | -2.763788 | H  | -1.220675 | -2.184223 | 4.469558  |
| O | -0.690624 | -0.757900 | -1.814489 | H  | -0.352370 | -0.743780 | 5.014633  |
| O | 0.124520  | 1.154458  | -2.716928 | H  | -2.148437 | -0.774134 | 5.030210  |
| C | -1.167323 | -0.280646 | -4.093040 | N  | -0.279932 | -2.330663 | 0.097005  |
| H | -1.694849 | -1.233526 | -4.037000 | C  | 0.795138  | 2.678339  | 0.625447  |
| H | -1.865853 | 0.516359  | -4.369300 | O  | 0.502834  | 3.930926  | 1.037682  |
| H | -0.396852 | -0.321048 | -4.869734 | N  | -0.147536 | 1.805321  | 0.711071  |

### TS2a

| Atom | X         | Y         | Z         | Atom | X         | Y         | Z         |
|------|-----------|-----------|-----------|------|-----------|-----------|-----------|
| C    | -2.857864 | -1.418552 | -2.940168 | C    | 2.979056  | 3.678072  | -0.064221 |
| C    | -2.002541 | -1.783236 | -1.894269 | C    | 4.256072  | 3.530137  | -0.547646 |
| C    | -2.519523 | -2.443756 | -0.773701 | C    | 4.750838  | 2.236685  | -0.844099 |
| C    | -3.879215 | -2.753128 | -0.694802 | C    | 3.870385  | 1.127831  | -0.614539 |
| C    | -4.729345 | -2.392197 | -1.738233 | C    | 2.181157  | 2.513234  | 0.119698  |
| C    | -4.216907 | -1.730899 | -2.860635 | H    | 6.718038  | 2.839541  | -1.520056 |
| H    | -2.466162 | -0.898058 | -3.810212 | H    | 2.572686  | 4.652598  | 0.174275  |
| H    | -4.240388 | -3.276770 | 0.184606  | H    | 4.893151  | 4.397095  | -0.704783 |
| H    | -5.788731 | -2.627120 | -1.683565 | C    | 6.055382  | 1.994981  | -1.347535 |
| H    | -4.878161 | -1.456309 | -3.678295 | C    | 4.331043  | -0.189025 | -0.891093 |
| C    | -1.545091 | -2.902869 | 0.258860  | C    | 5.602847  | -0.388573 | -1.378353 |
| O    | -1.826955 | -3.770368 | 1.076017  | C    | 6.471105  | 0.708961  | -1.610437 |
| C    | 0.863806  | -3.093604 | 0.434241  | H    | 3.660868  | -1.018801 | -0.692460 |
| C    | 2.010121  | -2.482274 | 0.971093  | H    | 5.950087  | -1.397010 | -1.584870 |
| C    | 0.910873  | -4.477951 | 0.163597  | H    | 7.470998  | 0.528969  | -1.995206 |
| C    | 3.164399  | -3.227938 | 1.220007  | N    | 2.605030  | 1.289153  | -0.139760 |
| H    | 1.979800  | -1.427216 | 1.218657  | C    | -0.887468 | 3.949713  | 1.467888  |
| C    | 2.061759  | -5.214678 | 0.426527  | H    | -0.881085 | 4.278921  | 2.508347  |
| H    | 0.031698  | -4.977786 | -0.227257 | C    | -1.356912 | 2.479514  | 1.268455  |
| C    | 3.200760  | -4.596190 | 0.950559  | H    | -1.641622 | 1.948185  | 2.178084  |
| H    | 4.033771  | -2.731073 | 1.643712  | C    | -1.743889 | 4.854433  | 0.552680  |
| H    | 2.068116  | -6.281494 | 0.217313  | H    | -2.280236 | 5.608958  | 1.141391  |
| H    | 4.097017  | -5.175615 | 1.154895  | H    | -1.098820 | 5.399588  | -0.147096 |
|      |           |           |           | C    | -2.698770 | 3.899615  | -0.133310 |
|      |           |           |           | C    | -2.509116 | 2.580578  | 0.292489  |
|      |           |           |           | C    | -3.713520 | 4.203559  | -1.041896 |

|   |           |          |           |
|---|-----------|----------|-----------|
| C | -3.345830 | 1.552468 | -0.143835 |
| C | -4.534513 | 3.173512 | -1.508490 |
| H | -3.872659 | 5.226238 | -1.375950 |
| C | -4.358057 | 1.860040 | -1.056585 |
| H | -3.216285 | 0.547878 | 0.246354  |
| H | -5.328710 | 3.398651 | -2.215815 |
| H | -5.016169 | 1.071800 | -1.410483 |

### TS2b

| Atom | X         | Y         | Z         |
|------|-----------|-----------|-----------|
| Pd   | -0.472076 | -0.175816 | 0.276044  |
| C    | -1.116825 | 0.308293  | 3.142894  |
| O    | -2.124207 | 0.949972  | 2.806874  |
| O    | -0.248223 | -0.227334 | 2.343279  |
| C    | -0.818820 | 0.049729  | 4.618264  |
| H    | -1.072826 | -0.990186 | 4.854298  |
| H    | 0.246700  | 0.180906  | 4.829119  |
| H    | -1.416269 | 0.713143  | 5.247704  |
| C    | 0.704562  | 2.670893  | 0.460406  |
| O    | 0.452352  | 3.981962  | 0.663510  |
| N    | -0.312679 | 1.904397  | 0.274360  |
| C    | 3.033078  | 3.181502  | 1.199495  |
| C    | 4.360092  | 2.835057  | 1.272779  |
| C    | 4.805513  | 1.632857  | 0.671199  |
| C    | 3.824427  | 0.826756  | 0.003840  |
| C    | 2.139792  | 2.304677  | 0.523546  |
| H    | 6.896328  | 1.814792  | 1.205290  |
| H    | 2.657999  | 4.094432  | 1.645218  |
| H    | 5.073292  | 3.474053  | 1.787687  |
| C    | 6.157022  | 1.201157  | 0.696355  |
| C    | 4.231759  | -0.383186 | -0.619103 |
| C    | 5.550506  | -0.773722 | -0.575397 |
| C    | 6.520861  | 0.022053  | 0.085532  |
| H    | 3.477546  | -0.980936 | -1.117297 |
| H    | 5.852589  | -1.703683 | -1.048416 |
| H    | 7.556556  | -0.305243 | 0.109492  |
| N    | 2.510884  | 1.178094  | -0.056648 |
| C    | -0.982852 | 4.177873  | 0.539490  |
| H    | -1.306058 | 4.686910  | 1.448608  |
| C    | -1.548591 | 2.737037  | 0.393485  |
| H    | -2.075657 | 2.356871  | 1.273498  |
| C    | -1.342472 | 4.959596  | -0.746918 |
| H    | -1.803188 | 5.926745  | -0.514196 |
| H    | -0.430902 | 5.171981  | -1.319627 |
| C    | -2.291659 | 4.038558  | -1.485354 |
| C    | -2.415393 | 2.800613  | -0.843460 |

|   |           |           |           |
|---|-----------|-----------|-----------|
| C | -3.029468 | 4.310292  | -2.638145 |
| C | -3.301993 | 1.834411  | -1.321817 |
| C | -3.897202 | 3.334448  | -3.135174 |
| H | -2.941491 | 5.271229  | -3.139479 |
| C | -4.039029 | 2.107039  | -2.477274 |
| H | -3.421909 | 0.890373  | -0.797487 |
| H | -4.479626 | 3.537148  | -4.030050 |
| H | -4.736181 | 1.366603  | -2.860156 |
| C | 1.695479  | -2.468580 | -2.939731 |
| C | 0.836542  | -2.424507 | -1.834100 |
| C | 1.194679  | -3.082645 | -0.651470 |
| C | 2.389168  | -3.804202 | -0.575824 |
| C | 3.234991  | -3.860941 | -1.681703 |
| C | 2.887178  | -3.193235 | -2.862268 |
| H | 1.427678  | -1.953223 | -3.858468 |
| H | 2.619888  | -4.322002 | 0.349884  |
| H | 4.160678  | -4.427931 | -1.631173 |
| H | 3.543378  | -3.239496 | -3.727341 |
| C | 0.191795  | -3.115241 | 0.456872  |
| O | 0.276496  | -3.929239 | 1.368772  |
| N | -0.874234 | -2.240668 | 0.251607  |
| C | -2.175158 | -2.637967 | 0.644519  |
| C | -2.578965 | -3.986507 | 0.522543  |
| C | -3.127921 | -1.696177 | 1.072597  |
| C | -3.883258 | -4.367615 | 0.818518  |
| H | -1.857501 | -4.737314 | 0.220116  |
| C | -4.438282 | -2.088932 | 1.355712  |
| H | -2.835180 | -0.663886 | 1.235324  |
| C | -4.827875 | -3.421409 | 1.229117  |
| H | -4.164401 | -5.413627 | 0.724099  |
| H | -5.148955 | -1.340586 | 1.697132  |
| H | -5.846291 | -3.723723 | 1.457566  |
| C | -0.468000 | -1.697381 | -1.889949 |
| C | -0.443093 | -0.284133 | -1.866603 |
| H | 0.521119  | 0.198725  | -2.019127 |
| H | -1.306514 | 0.244562  | -2.266431 |
| C | -1.654123 | -2.430917 | -2.452846 |
| H | -1.701205 | -3.469154 | -2.118581 |
| H | -1.561639 | -2.429008 | -3.549030 |
| H | -2.590379 | -1.929838 | -2.191054 |

### TS3a

| Atom | X        | Y         | Z        |
|------|----------|-----------|----------|
| C    | 1.559649 | -1.060582 | 3.552797 |
| C    | 2.171074 | -1.299956 | 2.323601 |
| C    | 3.482317 | -1.751450 | 2.275535 |

|    |           |           |           |             |           |           |           |
|----|-----------|-----------|-----------|-------------|-----------|-----------|-----------|
| C  | 4.236578  | -1.976332 | 3.425709  | H           | -4.302649 | 1.411663  | 2.146940  |
| C  | 3.632023  | -1.728726 | 4.657796  | H           | -5.397654 | -0.694135 | 2.925757  |
| C  | 2.305605  | -1.273761 | 4.716598  | C           | -4.893432 | -3.185207 | 1.882198  |
| H  | 0.531835  | -0.712855 | 3.616003  | C           | -2.963306 | -3.117024 | -0.177061 |
| H  | 5.259850  | -2.330931 | 3.345223  | C           | -3.550081 | -4.304813 | 0.197208  |
| H  | 4.186755  | -1.887150 | 5.578565  | C           | -4.519059 | -4.340683 | 1.233072  |
| H  | 1.849526  | -1.083746 | 5.684936  | H           | -2.217772 | -3.065451 | -0.964837 |
| C  | 3.898323  | -1.914752 | 0.867231  | H           | -3.269671 | -5.227652 | -0.302589 |
| O  | 4.997154  | -2.308160 | 0.495918  | H           | -4.967799 | -5.289746 | 1.512818  |
| C  | 2.859290  | -1.231356 | -1.308018 | N           | -2.728466 | -0.752523 | 0.082787  |
| C  | 1.723487  | -0.734352 | -2.023045 | C           | -2.410246 | 3.860738  | -0.150562 |
| C  | 4.090408  | -1.381217 | -1.985357 | H           | -3.064641 | 4.322299  | -0.892084 |
| C  | 1.944019  | -0.313500 | -3.362877 | C           | -1.143028 | 3.184488  | -0.757993 |
| H  | 0.550129  | -1.446728 | -2.150550 | H           | -1.083856 | 3.258970  | -1.849005 |
| C  | 4.237613  | -0.972588 | -3.305146 | C           | -1.944388 | 4.853447  | 0.937768  |
| H  | 4.932236  | -1.799944 | -1.456369 | H           | -2.316082 | 5.864927  | 0.733342  |
| C  | 3.168807  | -0.411674 | -4.006346 | H           | -2.350845 | 4.558228  | 1.912798  |
| H  | 1.090106  | 0.069789  | -3.913460 | C           | -0.432087 | 4.785886  | 0.887295  |
| H  | 5.206295  | -1.094425 | -3.784209 | C           | 0.018504  | 3.867565  | -0.067131 |
| H  | 3.283547  | -0.083110 | -5.035810 | C           | 0.483851  | 5.528344  | 1.634176  |
| C  | 1.601685  | -1.202841 | 0.916152  | C           | 1.382293  | 3.687540  | -0.301374 |
| C  | 1.078992  | 0.210124  | 0.621407  | C           | 1.850167  | 5.341911  | 1.411805  |
| H  | 1.906106  | 0.927109  | 0.676904  | H           | 0.142154  | 6.246241  | 2.375994  |
| H  | 0.342238  | 0.481914  | 1.387243  | C           | 2.297267  | 4.430170  | 0.448021  |
| C  | 0.537404  | -2.312481 | 0.769101  | H           | 1.723021  | 2.970763  | -1.043398 |
| H  | 0.962787  | -3.280119 | 1.057443  | H           | 2.572202  | 5.914844  | 1.987466  |
| H  | -0.311124 | -2.098891 | 1.426906  | H           | 3.362678  | 4.299758  | 0.280332  |
| H  | 0.160781  | -2.381956 | -0.251033 |             |           |           |           |
| Pd | 0.104525  | 0.340072  | -1.153087 | <b>TS3b</b> |           |           |           |
| C  | -1.262485 | -1.188034 | -3.204297 | Atom        | X         | Y         | Z         |
| O  | -0.487204 | -2.085309 | -2.711186 | Pd          | -0.351839 | -0.107277 | 1.104666  |
| O  | -1.156485 | 0.047388  | -2.972864 | C           | -1.472319 | -1.445277 | 3.467357  |
| C  | -2.383737 | -1.673564 | -4.101527 | O           | -1.530631 | -0.263463 | 3.023554  |
| H  | -3.207161 | -2.029777 | -3.470590 | O           | -0.649782 | -2.333867 | 3.048856  |
| H  | -2.754273 | -0.858969 | -4.727095 | C           | -2.407446 | -1.863336 | 4.586091  |
| H  | -2.047837 | -2.510636 | -4.718787 | H           | -1.825662 | -2.006251 | 5.503702  |
| N  | 2.803869  | -1.517380 | 0.076811  | H           | -3.172296 | -1.104051 | 4.759428  |
| C  | -2.439016 | 1.619693  | 0.190697  | H           | -2.873202 | -2.823715 | 4.345227  |
| O  | -3.155467 | 2.746904  | 0.413418  | C           | -1.937581 | 2.226338  | -0.219248 |
| N  | -1.315344 | 1.748747  | -0.420628 | O           | -3.130603 | 2.804414  | -0.487887 |
| C  | -4.052767 | 0.451554  | 1.711498  | N           | -1.956099 | 1.051216  | 0.304924  |
| C  | -4.654373 | -0.710122 | 2.132304  | C           | -0.850299 | 4.044800  | -1.564676 |
| C  | -4.311351 | -1.942245 | 1.521492  | C           | 0.269648  | 4.783514  | -1.863439 |
| C  | -3.327298 | -1.908150 | 0.478583  | C           | 1.480270  | 4.541863  | -1.166528 |
| C  | -3.080265 | 0.373462  | 0.676009  | C           | 1.467421  | 3.520194  | -0.160010 |
| H  | -5.638052 | -3.209152 | 2.674185  | C           | -0.749993 | 3.044744  | -0.558562 |

|   |           |           |           |             |           |           |           |
|---|-----------|-----------|-----------|-------------|-----------|-----------|-----------|
| H | 2.692357  | 6.027965  | -2.174833 | C           | 3.992207  | -0.860645 | 3.073357  |
| H | -1.792236 | 4.206336  | -2.075584 | H           | 4.601885  | -1.939081 | 1.325994  |
| H | 0.237950  | 5.553696  | -2.630279 | C           | 2.942450  | -0.251981 | 3.764682  |
| C | 2.683153  | 5.253590  | -1.411594 | H           | 0.834485  | 0.095960  | 3.770676  |
| C | 2.655994  | 3.242842  | 0.569309  | H           | 4.999068  | -0.852100 | 3.484403  |
| C | 3.806455  | 3.949925  | 0.302982  | H           | 3.110398  | 0.242938  | 4.717538  |
| C | 3.820458  | 4.961842  | -0.691662 | C           | 1.071027  | -1.893597 | -0.823445 |
| H | 2.620262  | 2.461593  | 1.322293  | C           | 0.495962  | -0.475177 | -0.700596 |
| H | 4.715950  | 3.733018  | 0.855817  | H           | 1.280423  | 0.259869  | -0.912717 |
| H | 4.739578  | 5.507827  | -0.885216 | H           | -0.306844 | -0.351811 | -1.437261 |
| N | 0.351800  | 2.798374  | 0.125511  | C           | 0.086352  | -3.017166 | -0.426919 |
| C | -4.171770 | 1.888945  | -0.045611 | H           | 0.544854  | -3.996102 | -0.605381 |
| H | -4.746115 | 2.423875  | 0.713034  | H           | -0.817905 | -2.943895 | -1.040257 |
| C | -3.375594 | 0.666037  | 0.505004  | H           | -0.206513 | -2.954063 | 0.621672  |
| H | -3.512798 | 0.484155  | 1.574803  |             |           |           |           |
| C | -5.042620 | 1.401351  | -1.224162 | <b>TS4a</b> |           |           |           |
| H | -6.105399 | 1.592637  | -1.030886 | Atom        | X         | Y         | Z         |
| H | -4.783333 | 1.951283  | -2.136810 | C           | 3.950093  | -2.990161 | -0.310803 |
| C | -4.749100 | -0.081196 | -1.322969 | C           | 3.808046  | -1.607035 | -0.385248 |
| C | -3.836426 | -0.497470 | -0.347588 | C           | 4.900761  | -0.808252 | -0.723806 |
| C | -5.297183 | -1.006488 | -2.212724 | C           | 6.158801  | -1.348385 | -0.980820 |
| C | -3.472720 | -1.839587 | -0.233718 | C           | 6.306605  | -2.733468 | -0.892309 |
| C | -4.925134 | -2.349114 | -2.110876 | C           | 5.211758  | -3.543593 | -0.557891 |
| H | -6.008977 | -0.691267 | -2.971952 | H           | 3.109904  | -3.631469 | -0.056585 |
| C | -4.021912 | -2.764476 | -1.125168 | H           | 6.989771  | -0.696640 | -1.234329 |
| H | -2.767110 | -2.156385 | 0.528405  | H           | 7.274314  | -3.190282 | -1.080783 |
| H | -5.347310 | -3.078404 | -2.797118 | H           | 5.345918  | -4.620012 | -0.487618 |
| H | -3.748784 | -3.813391 | -1.049688 | C           | 4.504060  | 0.622582  | -0.682423 |
| C | 0.820888  | -2.164307 | -3.438111 | O           | 5.221395  | 1.598511  | -0.849651 |
| C | 1.537669  | -2.180145 | -2.243058 | C           | 2.538109  | 1.593365  | 0.481221  |
| C | 2.873917  | -2.554633 | -2.237496 | C           | 1.500181  | 1.099265  | 1.316291  |
| C | 3.551122  | -2.917973 | -3.400133 | C           | 3.023980  | 2.898565  | 0.618822  |
| C | 2.840946  | -2.893755 | -4.600184 | C           | 1.151416  | 1.884124  | 2.440145  |
| C | 1.488569  | -2.518637 | -4.615064 | C           | 2.553739  | 3.699368  | 1.664713  |
| H | -0.228507 | -1.882594 | -3.465546 | H           | 3.802245  | 3.245847  | -0.048152 |
| H | 4.597128  | -3.206137 | -3.353777 | C           | 1.648024  | 3.183841  | 2.592782  |
| H | 3.332945  | -3.166065 | -5.529937 | H           | 0.467515  | 1.486569  | 3.185186  |
| H | 0.949647  | -2.504067 | -5.559068 | H           | 2.940566  | 4.708682  | 1.777916  |
| C | 3.403961  | -2.476976 | -0.860274 | H           | 1.325182  | 3.786273  | 3.438465  |
| O | 4.550160  | -2.750516 | -0.526338 | C           | 2.570652  | -0.735047 | -0.237199 |
| N | 2.349026  | -2.018957 | -0.049807 | C           | 1.832027  | -0.805470 | 1.107651  |
| C | 2.490780  | -1.511375 | 1.263497  | H           | 2.512009  | -0.849350 | 1.959931  |
| C | 1.381758  | -0.966859 | 1.983124  | H           | 1.209076  | -1.710347 | 1.152225  |
| C | 3.776030  | -1.484582 | 1.850883  | C           | 1.632704  | -1.009991 | -1.433454 |
| C | 1.669338  | -0.326196 | 3.218233  | H           | 2.178867  | -0.888612 | -2.374602 |
| H | 0.266753  | -1.714245 | 2.304545  | H           | 1.242698  | -2.032793 | -1.386186 |

|             |           |           |           |   |           |           |           |
|-------------|-----------|-----------|-----------|---|-----------|-----------|-----------|
| H           | 0.781965  | -0.319770 | -1.414495 | C | 3.672800  | 2.388803  | -1.691825 |
| Pd          | -0.223178 | 0.111536  | 0.906129  | C | 3.451799  | 3.742072  | -1.591470 |
| N           | 3.143633  | 0.632208  | -0.356228 | C | 2.304944  | 4.221665  | -0.911113 |
| C           | -3.259221 | -0.155190 | 0.372693  | C | 1.413105  | 3.248165  | -0.346617 |
| O           | -4.483690 | -0.726218 | 0.477800  | C | 2.729415  | 1.507827  | -1.101619 |
| N           | -2.243077 | -0.818939 | 0.795125  | H | 2.679161  | 6.336280  | -1.193200 |
| C           | -4.363993 | 1.794978  | -0.768892 | H | 4.538182  | 1.986613  | -2.205189 |
| C           | -4.252332 | 3.052300  | -1.313288 | H | 4.148708  | 4.451995  | -2.030328 |
| C           | -3.000232 | 3.715507  | -1.306363 | C | 2.002985  | 5.600395  | -0.764718 |
| C           | -1.886837 | 3.026882  | -0.716353 | C | 0.251398  | 3.684350  | 0.347093  |
| C           | -3.202324 | 1.195573  | -0.216639 | C | -0.009666 | 5.030334  | 0.467993  |
| H           | -3.646231 | 5.531303  | -2.294061 | C | 0.869067  | 5.994436  | -0.089766 |
| H           | -5.305404 | 1.258700  | -0.754828 | H | -0.409364 | 2.934298  | 0.767751  |
| H           | -5.116633 | 3.546564  | -1.750225 | H | -0.899322 | 5.358657  | 0.997367  |
| C           | -2.801841 | 5.012436  | -1.846751 | H | 0.642123  | 7.051436  | 0.018566  |
| C           | -0.614716 | 3.659666  | -0.681235 | N | 1.647478  | 1.913211  | -0.454753 |
| C           | -0.459709 | 4.918465  | -1.216061 | C | 3.954574  | -1.860911 | -1.803223 |
| C           | -1.556994 | 5.599678  | -1.802612 | H | 3.874259  | -2.141234 | -2.856603 |
| H           | 0.213785  | 3.126917  | -0.228000 | C | 2.677041  | -2.152163 | -0.955906 |
| H           | 0.514897  | 5.396725  | -1.186591 | H | 1.950430  | -2.795469 | -1.462801 |
| H           | -1.410474 | 6.592755  | -2.218304 | C | 5.153388  | -2.514549 | -1.090926 |
| N           | -2.014612 | 1.780463  | -0.185607 | H | 5.520117  | -3.370086 | -1.673380 |
| C           | -4.302968 | -1.997232 | 1.164405  | H | 5.985662  | -1.806411 | -1.008261 |
| H           | -4.811774 | -1.905490 | 2.127028  | C | 4.599855  | -2.952098 | 0.249691  |
| C           | -2.749218 | -2.126247 | 1.266370  | C | 3.214251  | -2.772485 | 0.319821  |
| H           | -2.387918 | -2.291416 | 2.286425  | C | 5.291593  | -3.498564 | 1.331682  |
| C           | -4.824225 | -3.171084 | 0.313928  | C | 2.500572  | -3.129445 | 1.464173  |
| H           | -5.416205 | -3.858468 | 0.932149  | C | 4.581297  | -3.858340 | 2.479568  |
| H           | -5.487317 | -2.805627 | -0.478473 | H | 6.368591  | -3.641574 | 1.286413  |
| C           | -3.571699 | -3.840347 | -0.211668 | C | 3.194928  | -3.674800 | 2.546382  |
| C           | -2.414271 | -3.279843 | 0.339663  | H | 1.427776  | -2.963578 | 1.515434  |
| C           | -3.479055 | -4.909843 | -1.103657 | H | 5.110232  | -4.282836 | 3.328730  |
| C           | -1.154602 | -3.785724 | 0.018450  | H | 2.655990  | -3.955508 | 3.447132  |
| C           | -2.218460 | -5.411969 | -1.434447 | C | -4.113598 | -3.023285 | -1.405670 |
| H           | -4.374578 | -5.349796 | -1.535910 | C | -4.012629 | -1.728614 | -0.903168 |
| C           | -1.062529 | -4.855404 | -0.874540 | C | -5.164330 | -0.980680 | -0.656756 |
| H           | -0.260700 | -3.347153 | 0.451368  | C | -6.439769 | -1.493263 | -0.882752 |
| H           | -2.134750 | -6.243511 | -2.128993 | C | -6.543725 | -2.796252 | -1.372169 |
| H           | -0.088169 | -5.258572 | -1.136790 | C | -5.390358 | -3.552119 | -1.627888 |
|             |           |           |           | H | -3.228514 | -3.619354 | -1.613293 |
|             |           |           |           | H | -7.315702 | -0.886361 | -0.673070 |
|             |           |           |           | H | -7.522171 | -3.231668 | -1.555809 |
|             |           |           |           | H | -5.489847 | -4.567114 | -2.004016 |
|             |           |           |           | C | -4.789762 | 0.335888  | -0.080109 |
|             |           |           |           | O | -5.540581 | 1.211777  | 0.324499  |
|             |           |           |           | N | -3.390915 | 0.351633  | -0.040652 |
| <b>TS4b</b> |           |           |           |   |           |           |           |
| Atom        | X         | Y         | Z         |   |           |           |           |
| Pd          | 0.170485  | -0.288798 | 0.240239  |   |           |           |           |
| C           | 2.907951  | 0.046017  | -1.182282 |   |           |           |           |
| O           | 4.044279  | -0.406487 | -1.766485 |   |           |           |           |
| N           | 2.068959  | -0.823582 | -0.744117 |   |           |           |           |

|   |           |           |           |
|---|-----------|-----------|-----------|
| C | -2.637667 | 0.934180  | 1.000981  |
| C | -1.443011 | 0.245525  | 1.341894  |
| C | -3.100097 | 2.009823  | 1.767084  |
| C | -0.874101 | 0.527013  | 2.605594  |
| C | -2.431403 | 2.349195  | 2.947932  |
| H | -4.004005 | 2.523271  | 1.466484  |
| C | -1.344161 | 1.591137  | 3.384635  |
| H | -0.042758 | -0.070355 | 2.970248  |
| H | -2.799442 | 3.176764  | 3.548725  |
| H | -0.858237 | 1.820625  | 4.329888  |
| C | -2.785467 | -0.873441 | -0.627369 |
| C | -1.777295 | -1.421642 | 0.392834  |
| H | -2.259967 | -1.892074 | 1.250955  |
| H | -1.142414 | -2.186956 | -0.077590 |
| C | -2.117654 | -0.528898 | -1.977079 |
| H | -2.852354 | -0.089547 | -2.659627 |
| H | -1.710539 | -1.435579 | -2.439531 |
| H | -1.294773 | 0.177682  | -1.823052 |
